# Supplementary material for: Seroprevalence of SARS-CoV-2-specific IgG antibodies in Kashmir, India, 7 months after the first reported local COVID-19 case: results of a population-based seroprevalence survey from October to November 2020
Source: PubMed Central journal article supplement — BMJ Open. 2021 Sep 23;11(9):e053791. doi: 10.1136/bmjopen-2021-053791 (PMC8461364; doi:10.1136/bmjopen-2021-053791), 2021-09-23
Supplement: bmjopen-2021-053791.draft_revisions.pdf [file bmjopen-2021-053791.draft_revisions.pdf]

# BMJ Open

BMJ Open is committed to open peer review. As part of this commitment we make the peer review history of every article we publish publicly available.

When an article is published we post the peer reviewers' comments and the authors' responses online. We also post the versions of the paper that were used during peer review. These are the versions that the peer review comments apply to.

The versions of the paper that follow are the versions that were submitted during the peer review process. They are not the versions of record or the final published versions. They should not be cited or distributed as the published version of this manuscript.

BMJ Open is an open access journal and the full, final, typeset and author-corrected version of record of the manuscript is available on our site with no access controls, subscription charges or pay-per-view fees (<http://bmjopen.bmj.com>).

If you have any questions on BMJ Open's open peer review process please email [info.bmjopen@bmj.com](mailto:info.bmjopen@bmj.com)

# BMJ Open

## Results of a population-based survey to estimate the seroprevalence of SARS-CoV-2 specific IgG antibodies in Kashmir, India, seven months after the appearance of the first COVID-19 case

|                               |                                                                                                                                                                                                                                                                                                                                                                                                                                                                                                                                                                                                                                                                                                                                                                                                                                                                                                                                                                                                                                                                                                                                                                                                                                                                                                                                                                                                                                                                                                                                                                                                                                                                                                                                                                                                                                                                                                                                                                                                               |
|-------------------------------|---------------------------------------------------------------------------------------------------------------------------------------------------------------------------------------------------------------------------------------------------------------------------------------------------------------------------------------------------------------------------------------------------------------------------------------------------------------------------------------------------------------------------------------------------------------------------------------------------------------------------------------------------------------------------------------------------------------------------------------------------------------------------------------------------------------------------------------------------------------------------------------------------------------------------------------------------------------------------------------------------------------------------------------------------------------------------------------------------------------------------------------------------------------------------------------------------------------------------------------------------------------------------------------------------------------------------------------------------------------------------------------------------------------------------------------------------------------------------------------------------------------------------------------------------------------------------------------------------------------------------------------------------------------------------------------------------------------------------------------------------------------------------------------------------------------------------------------------------------------------------------------------------------------------------------------------------------------------------------------------------------------|
| Journal:                      | <i>BMJ Open</i>                                                                                                                                                                                                                                                                                                                                                                                                                                                                                                                                                                                                                                                                                                                                                                                                                                                                                                                                                                                                                                                                                                                                                                                                                                                                                                                                                                                                                                                                                                                                                                                                                                                                                                                                                                                                                                                                                                                                                                                               |
| Manuscript ID                 | bmjopen-2021-053791                                                                                                                                                                                                                                                                                                                                                                                                                                                                                                                                                                                                                                                                                                                                                                                                                                                                                                                                                                                                                                                                                                                                                                                                                                                                                                                                                                                                                                                                                                                                                                                                                                                                                                                                                                                                                                                                                                                                                                                           |
| Article Type:                 | Original research                                                                                                                                                                                                                                                                                                                                                                                                                                                                                                                                                                                                                                                                                                                                                                                                                                                                                                                                                                                                                                                                                                                                                                                                                                                                                                                                                                                                                                                                                                                                                                                                                                                                                                                                                                                                                                                                                                                                                                                             |
| Date Submitted by the Author: | 24-May-2021                                                                                                                                                                                                                                                                                                                                                                                                                                                                                                                                                                                                                                                                                                                                                                                                                                                                                                                                                                                                                                                                                                                                                                                                                                                                                                                                                                                                                                                                                                                                                                                                                                                                                                                                                                                                                                                                                                                                                                                                   |
| Complete List of Authors:     | <p>Khan, S Muhammad; Government Medical College Srinagar, Community Medicine<br/>         Qurieshi, Mariya; Government Medical College Srinagar, Community Medicine<br/>         Haq, Inaamul; Government Medical College Srinagar, Community Medicine<br/>         Majid, Sabhiya; Government Medical College Srinagar, Biochemistry<br/>         Ahmad, Javid; Sher-i-Kashmir Institute of Medical Sciences, Community Medicine<br/>         Ayub, Taha; Government Medical College Srinagar, Community Medicine<br/>         Fazili, Anjum; Sher-i-Kashmir Institute of Medical Sciences, Community Medicine<br/>         Bhat, Ashfaq; SKIMS Medical College Srinagar, Community Medicine<br/>         Ganai, Abdul; Government Medical College Baramulla, Community Medicine<br/>         Jan, Yasmeen; SKIMS Medical College Srinagar, Community Medicine<br/>         Kaul, Rauf-ur-Rashid; Sher-i-Kashmir Institute of Medical Sciences, Community Medicine<br/>         Khan, Zahid; Government Medical College Baramulla, Community Medicine<br/>         Masoodi, Muneer; Government Medical College Anantnag, Community Medicine<br/>         Mushtaq, Beenish; SKIMS Medical College Srinagar, Community Medicine<br/>         Nazir, Fouzia; Government Medical College Anantnag, Community Medicine<br/>         Nazir, Muzamil; Government Medical College Baramulla, Community Medicine<br/>         Raja, Malik; Government Medical College Srinagar, Community Medicine<br/>         Rasool, Mahbooba; Government Medical College Anantnag, Community Medicine<br/>         Asma, Anjum; Government Medical College Srinagar, Community Medicine<br/>         Aziz, Munazza; Government of Jammu and Kashmir Directorate of Health Services<br/>         Ayoub, Shifana; Government Medical College Srinagar, Community Medicine<br/>         Bhat, Arif; Government Medical College Srinagar, Biochemistry<br/>         Chowdri, Iqra; Government Medical College Srinagar, Community</p> |

1  
2  
3  
4  
5  
6  
7  
8  
9  
10  
11  
12  
13  
14  
15  
16  
17  
18  
19  
20  
21  
22  
23  
24  
25  
26  
27  
28  
29  
30  
31  
32  
33  
34  
35  
36  
37  
38  
39  
40  
41  
42  
43  
44  
45  
46  
47  
48  
49  
50  
51  
52  
53  
54  
55  
56  
57  
58  
59  
60

|           |                                                                                                                                                                                                                                                                                                                                                                                                                                                                                                                                                                                                                                                                                                                                                                                                   |
|-----------|---------------------------------------------------------------------------------------------------------------------------------------------------------------------------------------------------------------------------------------------------------------------------------------------------------------------------------------------------------------------------------------------------------------------------------------------------------------------------------------------------------------------------------------------------------------------------------------------------------------------------------------------------------------------------------------------------------------------------------------------------------------------------------------------------|
|           | Medicine<br>Ismail, Shiasta; Government Medical College Srinagar, Community<br>Medicine<br>Kawoosa, Misbah; Government Medical College Srinagar, Community<br>Medicine<br>Khan, Mehvish; Government Medical College Srinagar, Community<br>Medicine<br>Kousar, Rafiya; Government Medical College Srinagar, Community<br>Medicine<br>Lone, Ab; Government Medical College Srinagar, Community Medicine<br>Nabi, Shahroz; Government Medical College Srinagar, Community<br>Medicine<br>Obaid, Mohammad; Government Medical College Srinagar, Biochemistry<br>Qazi, Tanzeela; Government Medical College Srinagar, Community<br>Medicine<br>Sabah, Iram; Government Medical College Srinagar, Community<br>Medicine<br>Sumji, Ishtiyag; Government Medical College Srinagar, Community<br>Medicine |
| Keywords: | COVID-19, EPIDEMIOLOGY, Epidemiology < INFECTIOUS DISEASES                                                                                                                                                                                                                                                                                                                                                                                                                                                                                                                                                                                                                                                                                                                                        |
|           |                                                                                                                                                                                                                                                                                                                                                                                                                                                                                                                                                                                                                                                                                                                                                                                                   |

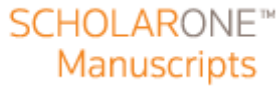

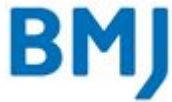

I, the Submitting Author has the right to grant and does grant on behalf of all authors of the Work (as defined in the below author licence), an exclusive licence and/or a non-exclusive licence for contributions from authors who are: i) UK Crown employees; ii) where BMJ has agreed a CC-BY licence shall apply, and/or iii) in accordance with the terms applicable for US Federal Government officers or employees acting as part of their official duties; on a worldwide, perpetual, irrevocable, royalty-free basis to BMJ Publishing Group Ltd ("BMJ") its licensees and where the relevant Journal is co-owned by BMJ to the co-owners of the Journal, to publish the Work in this journal and any other BMJ products and to exploit all rights, as set out in our [licence](#).

The Submitting Author accepts and understands that any supply made under these terms is made by BMJ to the Submitting Author unless you are acting as an employee on behalf of your employer or a postgraduate student of an affiliated institution which is paying any applicable article publishing charge ("APC") for Open Access articles. Where the Submitting Author wishes to make the Work available on an Open Access basis (and intends to pay the relevant APC), the terms of reuse of such Open Access shall be governed by a Creative Commons licence – details of these licences and which [Creative Commons](#) licence will apply to this Work are set out in our licence referred to above.

Other than as permitted in any relevant BMJ Author's Self Archiving Policies, I confirm this Work has not been accepted for publication elsewhere, is not being considered for publication elsewhere and does not duplicate material already published. I confirm all authors consent to publication of this Work and authorise the granting of this licence.

1  
2  
3 **Results of a population-based survey to estimate the seroprevalence of SARS-CoV-2 specific IgG**  
4 **antibodies in Kashmir, India, seven months after the appearance of the first COVID-19 case**  
5

6 S Muhammad Salim Khan,<sup>1</sup> Mariya Amin Qurieshi,<sup>1</sup> Inaamul Haq,<sup>1</sup> Sabhiya Majid,<sup>2</sup> Javid Ahmad,<sup>3\*</sup> Taha  
7 Ayub,<sup>1\*</sup> Anjum Bashir Fazili,<sup>3\*</sup> Ashfaq Ahmad Bhat,<sup>4\*</sup> Abdul Majeed Ganai,<sup>5\*</sup> Yasmeen Jan,<sup>4\*</sup> Rauf-ur-  
8 Rashid Kaul,<sup>3\*</sup> Zahid Ali Khan,<sup>5\*</sup> Muneer Ahmad Masoodi,<sup>6\*</sup> Beenish Mushtaq,<sup>4\*</sup> Fouzia Nazir,<sup>6\*</sup> Muzamil  
9 Nazir,<sup>5\*</sup> Malik Waseem Raja,<sup>1\*</sup> Mahbooba Rasool,<sup>6\*</sup> Anjum Asma,<sup>1†</sup> Munazza Aziz,<sup>7†</sup> Shifana Ayoub,<sup>1†</sup> Arif  
10 Akbar Bhat,<sup>2†</sup> Iqra Nisar Chowdri,<sup>1†</sup> Shaista Ismail,<sup>1†</sup> Misbah Ferooz Kawoosa,<sup>1†</sup> Mehvish Afzal Khan,<sup>1†</sup>  
11 Mosin Saleem Khan,<sup>2†</sup> Rafiya Kousar,<sup>1†</sup> Ab Aziz Lone,<sup>1†</sup> Shahroz Nabi,<sup>1†</sup> Mohammad Obaid,<sup>1†</sup> Tanzeela  
12 Bashir Qazi,<sup>1†</sup> Iram Sabah,<sup>1†</sup> Ishtiyag Ahmad Sumji<sup>1†</sup>  
13  
14

15 \*Authors in alphabetical order, Contributed equally

16 †Authors in alphabetical order, Contributed equally

17  
18 Corresponding author:

19  
20  
21 Dr. Inaamul Haq, Department of Community Medicine, Government Medical College, Srinagar, Jammu &  
22 Kashmir, 190010, India. Email: [haqinaam@yahoo.co.in](mailto:haqinaam@yahoo.co.in)  
23

24 Affiliation

25  
26 <sup>1</sup> Department of Community Medicine, Government Medical College Srinagar, Jammu & Kashmir, India

27  
28 <sup>2</sup> Department of Biochemistry, Government Medical College, Srinagar, Jammu & Kashmir, India

29  
30 <sup>3</sup> Department of Community Medical, Sher-i-Kashmir Institute of Medical Sciences, Srinagar, Jammu &  
31 Kashmir, India

32  
33 <sup>4</sup> Department of Community Medicine, SKIMS Medical College, Srinagar, Jammu & Kashmir, India

34  
35 <sup>5</sup> Department of Community Medicine, Government Medical College Baramulla, Jammu & Kashmir, India

36  
37 <sup>6</sup> Department of Community Medicine, Government Medical College Anantnag, Jammu & Kashmir, India  
38  
39

40 Word Count: 2913  
41  
42  
43  
44  
45  
46  
47  
48  
49  
50  
51  
52  
53  
54  
55  
56  
57

## ABSTRACT

**Objectives:** We designed a population-based survey in Kashmir to estimate the seroprevalence of SARS-CoV-2 specific IgG antibodies in the general population aged 18 years and above.

**Setting:** The survey was conducted among 110 villages and urban wards across ten districts in Kashmir from 17 Oct 2020 to 04 Nov 2020.

**Participants:** Individuals aged 18 years and above were eligible to be included in the survey. Serum samples were tested for the presence of SARS-CoV-2 specific IgG antibodies using the Abbott SARS-CoV-2 IgG assay.

**Primary and secondary outcome measures:** We labeled assay results equal to or above the cut-off index value of 1.4 as positive for SARS-CoV-2 specific IgG antibodies. Seroprevalence estimates were adjusted for the sampling design and assay characteristics.

**Results:** Out of 6397 eligible individuals enumerated, 6315 (98.7%) agreed to participate. The final analysis was done on 6230 participants. Seroprevalence adjusted for the sampling design and assay characteristics was 36.7% (95% CI 34.3%-39.2%). Seroprevalence was higher among the older population. Only one-half of symptomatic individuals reported having been tested. One out of every ten seropositive individuals reported a history of COVID-19 like symptoms. We estimated an infection fatality rate of 342 deaths per million infections.

**Conclusions:** During the first seven months of the COVID-19 epidemic in Kashmir valley, approximately 37% of individuals were infected. There is still a significant pool of susceptible people in Kashmir. The number of infections will continue to rise unless infection prevention measures are practiced by the population.

## ARTICLE SUMMARY

### Strengths and limitations of this study

- The findings of our study are based on a representative sample of the population.
- The laboratory test used for the detection of SARS-CoV-2 specific IgG antibodies in serum samples provides valid results.
- We report seroprevalence estimates adjusted for sampling design and test performance.
- Even though we adjusted the weighted seroprevalence estimates for test performance using manufacturer-provided sensitivity and specificity (100% and 99.63% respectively), we did not quantify the test validity in-house.
- Because of lack of age- and gender-specific mortality data we could not estimate age- and gender-specific infection fatality rate.

## INTRODUCTION

On 11 Feb 2020, the World Health Organization announced that the disease caused by the Severe Acute Respiratory Syndrome Coronavirus 2 (SARS-CoV-2) will be named coronavirus disease (COVID-19).[1] In Kashmir, the first case of COVID-19 was confirmed in Srinagar city on 18 Mar 2020.[2] The government imposed the first phase of the lockdown in Kashmir on 24 March 2020. During this phase, inter-state travel remained suspended. People were barred from moving outside except in an emergency. Except

1  
2  
3 for essential services, all government and private offices were advised to work from home. Universal  
4 masking was made mandatory. The lockdown was extended till 31 May 2020 and later relaxed in a  
5 phased manner.  
6

7 Mild or asymptomatic infections are common in Coronavirus disease 2019 (COVID-19) and are an  
8 important source of infection transmission.[3,4] Such cases are less likely to be detected by a  
9 surveillance system based on reverse-transcriptase polymerase chain reaction (RT-PCR) testing. The  
10 number of reported RT-PCR positive cases are an underestimate of the true number of infections in a  
11 population.  
12  
13

14 Seroprevalence surveys have been conducted in various countries at different stages of the current  
15 epidemic among various population groups.[5–14] Seroprevalence surveys provide a more accurate  
16 estimate of past infection, improve understanding of the infection transmission dynamics, and guide  
17 public health response.[15]  
18

19 We designed this survey to estimate the seroprevalence of severe acute respiratory syndrome  
20 coronavirus 2 (SARS-CoV-2) specific IgG antibodies in the adult population of Kashmir valley.  
21  
22

## 23 **METHODS**

24 We designed a population-based cross-sectional study. The study covered all the ten districts of  
25 Kashmir, a valley in northern India. We completed data collection in three weeks, from 17 Oct 2020 to  
26 04 Nov 2020.  
27  
28

## 29 **Ethics**

30 We obtained written informed consent from all study participants. The study was approved by the  
31 Institutional Ethics Committee of Government Medical College Srinagar. We used anonymized  
32 participant data for analysis.  
33  
34

## 35 **Patient and Public Involvement**

36 No patients were involved in this study.  
37  
38

## 39 **Sample size**

40 We calculated the minimum sample size based on an anticipated seroprevalence of 20%, an absolute  
41 error of 2%, and a design effect of 2. To obtain precise estimates for district Srinagar, sample size  
42 estimation was made for the district separately. We targeted a total sample size of 6400.  
43  
44

## 45 **Participants**

46 All adults  $\geq 18$  years of age were eligible to participate in the study. We selected eligible participants  
47 using a three-stage stratified cluster sampling technique. We listed all clusters in the valley using the  
48 Census 2011 data.[16] Within each of the ten districts in the valley, clusters were stratified into urban  
49 and rural clusters. We selected clusters within each of the 20 strata by probability proportionate to size  
50 (PPS) sampling. Except for district Srinagar which we oversampled to obtain precise seroprevalence  
51 estimates for, ten clusters were randomly selected from each district. We selected 20 clusters from  
52 district Srinagar. Within each selected cluster we identified four random locations and approached  
53 consecutive households to enroll at least ten eligible participants. We thus identified a total of 440  
54  
55  
56  
57

1  
2  
3 random locations within 110 clusters in ten districts. We invited all eligible adults in a household for  
4 participation.  
5

### 6 **Variables**

7  
8 The main outcome variable of interest was SARS-CoV-2 specific IgG antibodies. We obtained information  
9 from participants about their age, gender, history of COVID-19 like symptoms in the three months  
10 before the interview date, history of contact with a known COVID-19 patient, and history of COVID-19  
11 testing.  
12

### 13 **Procedure**

14  
15 We informed eligible adults about the purpose and the procedure of the study. Study participation was  
16 voluntary. Participants were interviewed by health personnel specifically trained for the interview.  
17 Interview responses were recorded in an Epicollect5 form.[17] Once the interview was completed, a  
18 trained phlebotomist collected 3-5 mL of venous blood from the antecubital vein under aseptic  
19 precautions into a red-top collection tube containing a clot activator. The tube was left standing,  
20 undisturbed, for at least 30 minutes for clot formation. The sample was later transported to a central  
21 facility for centrifugation. Centrifuged samples were transported to a central laboratory for further  
22 processing and analysis. Serum samples were tested for the presence of SARS-CoV-2 specific IgG  
23 antibodies using the Abbott SARS-CoV-2 IgG assay. The assay uses chemiluminescence to detect IgG  
24 antibodies against the SARS-CoV-2 nucleocapsid protein. The reported sensitivity and specificity of the  
25 assay are 100% and 99.63%, respectively.[18] As recommended by the manufacturer, we labeled assay  
26 results equal to or above the cut-off index value of 1.4 as positive for SARS-CoV-2 specific IgG antibodies.  
27  
28  
29  
30

### 31 **Statistical methods**

32  
33 We report unweighted seroprevalence estimates in percentages. We used the Agresti-Coull procedure  
34 to calculate a 95% confidence interval (CI) for seroprevalence estimates. A weighted estimate of  
35 seroprevalence is provided. To calculate survey weights (inverse of sampling probability) we used the  
36 estimated population of the districts. We used the census 2011 data and growth rates from Sample  
37 Registration System to estimate the population of the districts in 2020.[16,19] Survey weights so  
38 obtained was further adjusted for non-response and age and sex structure (post-stratification weights).  
39 We further adjusted the weighted seroprevalence estimates for test performance to calculate  
40 “weighted seroprevalence adjusted for test performance”. We did this using the formula:

41  
42 *Weighted seroprevalence adjusted for test performance* =  
43  $(\text{Weighted seroprevalence} + \text{Test specificity} - 1) / (\text{Test sensitivity} + \text{Test specificity} - 1)$ . [20]  
44

45 We used the manufacturer-provided sensitivity and specificity in the above formula.[18]  
46

47 We analyzed the difference in seroprevalence estimates across levels of a categorical variable using a  
48 Chi-square test adjusted for the sampling design.  
49

50 We estimated the number of SARS-CoV-2 infections by multiplying the weighted seroprevalence  
51 adjusted for test performance with the estimated population of the valley. To estimate the number of  
52 infections per reported case, we divided the estimated number of SARS-CoV-2 infections by the  
53 reported number of COVID-19 cases two weeks before the survey date. We calculated the infection  
54  
55  
56  
57



fatality rate by dividing the reported number of deaths by the number of estimated infections, assuming a three-week lag time from infection to death.[21]

We analyzed the data using Stata version 15 (StataCorp. 2017. Stata Statistical Software: Release 15. College Station, TX: StataCorp LP.).

## RESULTS

We enumerated 6 397 individuals  $\geq 18$  years from 3 077 households and 110 clusters (34 urban clusters and 76 rural clusters) between 17 Oct 2020 and 04 Nov 2020. Out of the 6 397 eligible individuals, 6 315 (98.7%) agreed to participate and were enrolled. The final analysis was done on a sample of 6 230 participants. (Figure 1)

Of the 6 230 participants, 1 513 (24.3%) were between 18 and 30 years of age, 2 672 (42.9%) were aged 30-49 years, 1 643 (26.4%) were aged 50-69 years, and 402 (6.4%) were 70 years and older. (Table 1). There was equal representation from males and females, and 3 364 (54.0%) resided in a rural area. Of the 3 104 females, 56 (1.8%) reported pregnant at the time of the survey. Four hundred seventy-four (7.6%) reported COVID-19 like symptoms in the three months preceding the survey and 439 (7.0%) reported to have ever come in contact with a known COVID-19 case. One thousand ninety-two (17.5%) reported having been tested for COVID-19 using RT-PCR or a Rapid Antigen Test (RAT) previously, of whom 176 (16.2%) reported to have tested positive for the disease.

**Table 1: Characteristics of study participants**

|                                                      | Frequency | Percent |
|------------------------------------------------------|-----------|---------|
| <b>Total</b>                                         | 6230      | ..      |
| <b>Age, years</b>                                    | ..        | ..      |
| 18-29                                                | 1513      | 24.3    |
| 30-49                                                | 2672      | 42.9    |
| 50-69                                                | 1643      | 26.4    |
| $\geq 70$                                            | 402       | 6.5     |
| <b>Gender</b>                                        | ..        | ..      |
| Male                                                 | 3126      | 50.2    |
| Female                                               | 3104      | 49.8    |
| <b>Residence</b>                                     | ..        | ..      |
| Urban                                                | 2866      | 46.0    |
| Rural                                                | 3364      | 54.0    |
| <b>Pregnant (n=3104)</b>                             | 56        | 1.8     |
| <b>Self-reported history of chronic disease</b>      | 1145      | 18.4    |
| <b>History of COVID-19 like symptoms</b>             | 474       | 7.6     |
| <b>History of contact with a known COVID-19 case</b> | 439       | 7.0     |
| <b>Ever tested for COVID-19 (RT-PCR)</b>             | 1092      | 17.5    |
| <b>RT-PCR result (n=1088*)</b>                       | ..        | ..      |
| Positive                                             | 176       | 16.2    |
| Negative                                             | 912       | 83.8    |

COVID-19: Coronavirus disease; RT-PCR: Reverse transcriptase polymerase chain reaction

\*RT-PCR result not known in four participants

We found an overall unweighted seroprevalence of 38.8% (95% CI 37.6 – 40.0). The seroprevalence ranged from 28.2% in district Kulgam to 41.7% in district Badgam. The overall weighted seroprevalence (adjusted for sampling design) was 36.9% (95% CI 34.5 – 39.4). The weighted seroprevalence adjusted for test performance was 36.7% (95% CI 34.3 – 39.2). (Table 1)

Seroprevalence was lowest among participants aged 18-29 years [33.5% (95% CI 29.8 – 37.4)] and was higher in older age groups. Seroprevalence was highest in those aged 70 years and above [45.1% (95% CI 37.6 – 52.8)]. Seroprevalence was not significantly different among males and females ( $p=0.34$ ). The seroprevalence among urban residents was 40.0% (95% CI 36.1 – 43.9), slightly but not significantly, higher than rural residents [35.3% (95% CI 32.2 – 38.5),  $p=0.07$ ]. (Table 2)

**Table 2: Seroprevalence of SARS-CoV-2 specific IgG antibodies by participant characteristics**

|                   | Number tested, n | Number seropositive, n | Unweighted seroprevalence, % (95% CI) | Weighted seroprevalence, % (95% CI) | Weighted seroprevalence adjusted for test performance, % (95% CI) | Design-based F, p-value |
|-------------------|------------------|------------------------|---------------------------------------|-------------------------------------|-------------------------------------------------------------------|-------------------------|
| <b>Total</b>      | 6230             | 2415                   | 38.8 (37.6-40.0)                      | 36.9 (34.5-39.4)                    | 36.7 (34.3-39.2)                                                  | ..                      |
| <b>Age, years</b> | ..               | ..                     | ..                                    | ..                                  | ..                                                                | ..                      |
| 18-29             | 1513             | 538                    | 35.6 (33.2-38.0)                      | 33.7 (30.1-37.6)                    | 33.5 (29.8-37.4)                                                  | 6.42, 0.0006            |
| 30-49             | 2672             | 1000                   | 37.4 (35.6-39.3)                      | 36.3 (33.5-39.3)                    | 36.1 (33.3-39.1)                                                  | ..                      |
| 50-69             | 1643             | 691                    | 42.1 (39.7-44.5)                      | 42.5 (38.8-46.2)                    | 42.3 (38.6-46.0)                                                  | ..                      |
| ≥70               | 402              | 186                    | 46.3 (41.5-51.2)                      | 45.3 (37.8-53.0)                    | 45.1 (37.6-52.8)                                                  | ..                      |
| <b>Gender</b>     | ..               | ..                     | ..                                    | ..                                  | ..                                                                | ..                      |
| Male              | 3126             | 1166                   | 37.3 (35.6-39.0)                      | 36.1 (33.5-38.9)                    | 35.9 (33.3-38.7)                                                  | 0.94, 0.34              |
| Female            | 3104             | 1249                   | 40.2 (38.5-42.0)                      | 37.8 (34.5-41.3)                    | 37.6 (34.3-41.1)                                                  | ..                      |
| <b>Residence</b>  | ..               | ..                     | ..                                    | ..                                  | ..                                                                | ..                      |
| Urban             | 2866             | 1180                   | 41.2 (39.4-43.0)                      | 40.2 (36.3-44.1)                    | 40.0 (36.1-43.9)                                                  | 3.43, 0.07              |
| Rural             | 3364             | 1235                   | 36.7 (35.1-38.4)                      | 35.5 (32.5-38.7)                    | 35.3 (32.2-38.5)                                                  | ..                      |

|                                                      |      |      |                  |                  |                  |                |
|------------------------------------------------------|------|------|------------------|------------------|------------------|----------------|
| <b>Self-reported history of chronic disease</b>      | ..   | ..   | ..               | ..               | ..               | ..             |
| Yes                                                  | 1145 | 495  | 43.2 (40.4-46.1) | 41.9 (37.4-46.6) | 41.7 (37.2-46.4) | 6.14, 0.02     |
| No                                                   | 5085 | 1920 | 37.8 (36.4-39.1) | 36.2 (33.7-38.9) | 36.0 (33.5-38.7) |                |
| <b>History of COVID-19 like symptoms</b>             | ..   | ..   | ..               | ..               | ..               | ..             |
| Yes                                                  | 474  | 247  | 52.1 (47.6-56.6) | 47.4 (37.9-57.1) | 47.2 (37.7-56.9) | 5.53, 0.02     |
| No                                                   | 5756 | 2168 | 37.7 (36.4-38.9) | 36.3 (33.9-38.8) | 36.1 (33.7-38.6) | ..             |
| <b>History of contact with a known COVID-19 case</b> | ..   | ..   | ..               | ..               | ..               | ..             |
| Yes                                                  | 439  | 219  | 49.9 (45.2-54.5) | 45.2 (38.3-52.2) | 45.0 (38.1-52.0) | 7.13, 0.01     |
| No                                                   | 5791 | 2196 | 37.9 (36.7-39.2) | 36.5 (34.1-39.0) | 36.3 (33.9-38.8) | ..             |
| <b>Ever tested for COVID-19 (RT-PCR)</b>             | ..   | ..   | ..               | ..               | ..               | ..             |
| Yes                                                  | 1092 | 485  | 44.4 (41.5-47.4) | 41.0 (35.4-46.9) | 40.8 (35.2-46.7) | 2.17, 0.14     |
| No                                                   | 5138 | 1930 | 37.6 (36.2-38.9) | 36.2 (33.5-39.0) | 36.0 (33.3-38.8) | ..             |
| <b>RT-PCR result (n=1088*)</b>                       | ..   | ..   | ..               | ..               | ..               | ..             |
| Positive                                             | 176  | 140  | 79.5 (73.0-84.9) | 81.8 (74.8-87.1) | 81.7 (74.7-87.1) | 74.93, <0.0001 |
| Negative                                             | 912  | 345  | 37.8 (34.7-41.0) | 38.8 (33.3-44.7) | 38.6 (33.1-44.5) | ..             |

COVID-19: Coronavirus disease; RT-PCR: Reverse transcriptase polymerase chain reaction

\*RT-PCR result not known in four participants

1  
2  
3 One in five participants (1145/6230, 18.4%) self-reported a history of at least one chronic disease (Table  
4 1). Hypertension (815/6230, 13.1%) and diabetes mellitus (314/6230, 5.0%) were the most commonly  
5 reported chronic diseases (Supplementary File 1). Seroprevalence was significantly higher in participants  
6 who self-reported history of chronic disease (41.7%, 95% CI 37.2 – 46.4) as compared to those who did  
7 not report a history of chronic disease (36.0%, 95% CI 33.5 - 38.7) (Table 2).  
8  
9

10 Among participants who reported a history of COVID-19 like symptoms, seroprevalence was 47.2% (95%  
11 CI 37.7 – 56.9) compared with 36.1% (95% CI 33.7 – 38.6) among participants who did not report such  
12 symptoms. Seroprevalence was higher among those who reported contact with a known COVID-19 case  
13 [45.0% (95% CI 38.1 – 52.0)] than participants who did not report any history of such contact [36.3%  
14 (95% CI 33.9 – 38.8)]. (Table 2)  
15

16 Seroprevalence was not significantly related to being tested for COVID-19 (RT-PCR). However, those who  
17 reported a positive RT-PCR COVID-19 test had significantly higher seroprevalence (81.7%, 95% CI 74.7 –  
18 87.1) as compared to those who reported a negative RT-PCR COVID-19 test (38.6%, 95% CI 33.1 – 44.5).  
19 (Table 2)  
20  
21

22 Among 2 415 seropositive individuals, only 247 (10.2%) reported a history of COVID-19 like symptoms.  
23 Among 474 who reported a history of COVID-19 like symptoms, 233 (49.2%) were tested for COVID-19  
24 (RT-PCR).  
25

26 Among 36 participants who reported a positive RT-PCR COVID-19 test but were seronegative, the  
27 duration between COVID-19 RT-PCR test and serological testing ranged from 9 days to 101 days. In only  
28 four of these 36 participants, the duration between the COVID-19 RT-PCR test and the serological test  
29 was 14 days or less. Of the remaining 32 participants, 21 did not report a history of COVID-19 like  
30 symptoms, nine did not report a history of contact with a known COVID-19 case, and eight reported  
31 neither a history of COVID-19 like symptoms nor a history of contact with a known COVID-19 case.  
32  
33

34 We estimated that there were 1 673 484 (95% CI 1 564 047 – 1 787 482) cumulative number of  
35 infections among adults aged  $\geq 18$  years in the valley by 03 Oct 2020, two weeks before the start of the  
36 survey. If we assume that the seroprevalence was similar to the overall seroprevalence in the population  
37 not included in our study ( $< 18$  years of age) then the estimated cumulative number of infections in the  
38 valley by 03 Oct 2020 was 2 791 933 (95% CI 2 609 354 – 2 982 119). Considering that the cumulative  
39 number of reported COVID-19 cases was 47 071 by 03 Oct 2020, we estimate the number of infections  
40 per reported case as 59.3 (95% CI 55.4 – 63.4). The number of reported COVID-19 deaths after a three-  
41 week lag period (on 24 Oct 2020) was 955. Thus, we estimated the infection fatality rate as 342.1 deaths  
42 per million infections (95% CI 320.2 – 366.0).  
43  
44  
45

## 46 DISCUSSION

47 The results of our study indicate that by the first week of October 2020, nearly seven months after the  
48 appearance of the first laboratory-confirmed COVID-19 case on 18 March 2020, close to 37% of the  
49 valley's population aged  $\geq 18$  years had been infected. Our results suggest that the cumulative number of  
50 SARS-CoV-2 infections by the first week of October 2020 was nearly 2.8 million with an estimated  
51 infection fatality rate of 342.1 deaths per million infections. Seroprevalence did not differ by gender but  
52 was higher in older age groups.  
53  
54  
55  
56  
57

1  
2  
3 The findings of our study are based on a representative sample of the population. The laboratory test  
4 used for the detection of SARS-CoV-2 specific IgG antibodies in serum samples provides valid  
5 results.[18,22] We report seroprevalence estimates adjusted for sampling design and test performance.  
6

7 The overall adjusted seroprevalence of around 37% indicates that a large proportion of the valley's  
8 population has been infected with the virus. Easing of lockdown, being fed up with the restrictions, and  
9 non-adherence to prevention norms are the possible reasons. Even though a large proportion of the  
10 population has been infected, the transmission of infection is expected to continue till most of the  
11 susceptible population becomes immune. Herd immunity in the context of COVID-19 is a matter of  
12 debate as reports of a second infection continue to pour in.[23] Several factors potentially influence the  
13 seroprevalence rates. These include population density, social and demographic structure of the  
14 population, governmental policies and the extent of their implementation, immunity level of the  
15 population, time since the start of infection transmission, adherence to infection prevention guidelines,  
16 quality of contact tracing and quarantine, and possibly the geography and environment of an area.  
17  
18  
19

20 The seroprevalence of SARS-CoV-2 IgG antibodies was higher in older age groups. During the early  
21 period of the pandemic, people were adherent to social distancing and other non-pharmaceutical  
22 interventions because of a fear of the disease and administrative restrictions. With time, administrative  
23 restrictions were relaxed, fear of the disease attenuated, and people became sort of fed up with the  
24 social restrictions. This not only led to an increase in the number of reported COVID-19 cases but also  
25 provided the population, including older age groups, an opportunity to contract the infection. That older  
26 people have an increased risk of symptomatic and more severe disease is now well known.[24,25]  
27 However, age-based differential susceptibility to SARS-CoV-2 infection antibody response and the  
28 reasons thereof are still a grey area and need further understanding. Existing literature might suggest  
29 that the young who are more mobile and socially active have a higher risk of infection.[6,7] However,  
30 this should not imply that the elderly have a decreased susceptibility to SARS-CoV-2 infection or a  
31 decreased antibody response.[26] On the contrary, several studies suggest that the seroprevalence of  
32 SARS-CoV-2 specific IgG antibodies is higher in the older age groups and particularly so in more dense  
33 population groups.[4,5,8–11,13] Furthermore, SARS-CoV-2 antibody levels have been reported to be  
34 higher in older people.[12]  
35  
36  
37  
38

39 The seroprevalence of SARS-CoV-2 specific IgG antibodies did not differ significantly by gender, though  
40 the figure was slightly higher for females. These findings are consistent with the available  
41 literature.[6,13] Difference in seroprevalence by gender has been suggested by some studies and  
42 females have been reported to have lower antibody levels.[5,7,9,11,12,14,27]  
43

44 Urban areas are more densely populated as compared to rural areas which accelerate the transmission  
45 of infections in the population. Seroprevalence of SARS-CoV-2 specific IgG antibodies is thus expected to  
46 be higher in urban areas especially during the early phases of an epidemic. As the epidemic progresses  
47 the seroprevalence gap between urban and rural areas will wane off. We estimated an adjusted  
48 seroprevalence of 40.0% (95% CI 36.1 – 43.9) in urban areas as compared to 35.3% (95% CI 32.2 – 38.5)  
49 in rural areas (p=0.07).  
50  
51

52 People with a chronic disease experience more severe COVID-19 symptoms and are more likely to die  
53 when compared to people with no chronic disease.[28] We found a higher proportion of symptomatic  
54 infection among participants with a self-reported history of chronic disease (78/1145, 6.8%) as  
55 compared to participants with no chronic disease (169/5085, 3.3%) (Supplementary File 2). Little is,  
56  
57  
58  
59

1  
2  
3 however, known about the risk of infection in chronic disease patients. We found a significantly higher  
4 seroprevalence among participants with a self-reported history of chronic disease (Table 2). This finding  
5 needs further research for corroboration and possible explanations.  
6

7  
8 People with a self-reported history of COVID-19 related symptoms, contact with a known COVID-19  
9 case, or a positive COVID-19 RT-PCR had a higher seroprevalence as compared to their complement.  
10 Among seropositive individuals, only 10·2% reported being symptomatic. The percentage of  
11 asymptomatic infections, thus, was 90%. However, only 49% of individuals with a history of COVID-19  
12 like symptoms were tested using RT-PCR. We also estimated that only one out of almost 59 infections  
13 gets reported. This reflects the necessity of improving the efficiency of RT-PCR testing so that more  
14 symptomatic individuals receive the test. Not all individuals with a known RT-PCR positive result showed  
15 the presence of IgG antibodies. Around 20% of RT-PCR positive individuals were seronegative and in a  
16 large majority of them (32 out of 36) the duration since RT-PCR positivity was more than two weeks. This  
17 may be attributed to a poor B cell response or a false negative antibody test.[29] Around 38% of RT-PCR  
18 negative individuals were seropositive suggesting a false-negative RT-PCR or infection acquisition at a  
19 date later than the RT-PCR test.  
20  
21

22  
23 We estimated an infection fatality rate of 342·1 per million infections (95% CI 320·2 – 366·0). In  
24 developed nations like the United States and many European countries, a higher infection fatality rate  
25 has been reported.[24,30] The infection fatality rate is, however, known to be lower in developing  
26 nations.[24,31]  
27

28  
29 One important limitation of our study is that even though we adjusted the weighted seroprevalence  
30 estimates for test performance using manufacturer-provided sensitivity and specificity (100% and  
31 99·63% respectively), we did not quantify the test validity in-house. Another limitation of our study  
32 estimates is that we excluded people <18 years of age. The results of our study may not thus be  
33 generalizable to this group of the population. Further, because of lack of age- and gender-specific  
34 mortality data we could not estimate age- and gender-specific infection fatality rate.  
35

## 36 **CONCLUSIONS**

37  
38 We conclude that nearly 37% of individuals aged 18 years and above were infected with SARS-CoV-2 in  
39 Kashmir by October 2020. The infection fatality rate in the valley is around 342 deaths per million  
40 infections. A majority of cases go unreported. Given the current adherence to COVID-19 prevention  
41 measures in the valley, the seroprevalence is going to increase. Since almost half of the symptomatic  
42 individuals go unreported, testing of symptomatic individuals and effective contact tracing needs to  
43 continue. We further recommend that adherence to COVID-19 prevention measures should be ensured  
44 at least till a large proportion of the population gets vaccinated.  
45  
46

## 47 **ACKNOWLEDGMENTS**

48  
49 We thank Prof. Samia Rashid for her support. We thank the following coordinating center teams and the  
50 laboratory support team for their support and coordination:  
51

52 Coordinating center teams: Dr. Sabira Aalia Dkhar, Dr. Kouser Sideeq, Dr. Uruj Qureshi, Dr. Mehraj u Din  
53 Sofi, Dr. Yasmin Kango, Dr. Suhail Manzoor Shah, Dr. Bashir Ahmad Khan, Dr. Nabeel Ishtiyayq, Dr.  
54 Tajamul Hussain Khan, Dr. Lahoot Hassan Khan, Dr. Muzaffer Ahmad, Dr. Ramesh Kumar Malla, Dr.  
55 Ruqaya Rasool Kapta, Dr. Mohammad Yousuf Naikoo, Dr. Khalid Abbass, Dr. Zarar Ahmad Bhat, Dr.  
56  
57

1  
2  
3 Sumair Rashid, Dr. Zubair Ahmad, Dr. Shalender Singh Bali, Dr. Abdul Rouf, Dr. Abdul Hamid, Dr. Khalid  
4 Bashir, Dr. Qazi Najeeb Ahmad, Dr. Syed Irtiza, Dr. P Sharik Shaheen Khaki, Dr. Sheikh Mohammad Shafi,  
5 Dr. Mohammad Yousuf Zagoo, Dr. Mukhtar Ahmad Shah, Dr. Imtiaz-ur-Rehman Bhat, Dr. Showkat  
6 Parray, Dr. Fazil Ali Kochak, Dr. Muzaffar Ahmad Zargar, Dr. Abdul Rashid Shah, Dr. Shagufta Saleem, Dr.  
7 Abdul Gani, Dr. Nighat Nasreen, Dr. Asima Nazeer, Dr. Zahoor Ahmad Lone.

8  
9  
10 Laboratory support team: Ishtiyaq Ahmad Handoo, Rahiba Makhdoomi, Iyman Wani, Romana Rasool,  
11 Asiya Rehman, Insha Rehman, Zahoor Ahmad, Gulzar Ahmad Wani, Javid Ahmad Bhat, M Saleem Malik,  
12 Naveed Manzoor, Mubeena.

### 13 14 **COMPETING INTERESTS**

15  
16 We declare no competing interests, financial or otherwise.

### 17 18 **FUNDING**

19  
20 The National Health Mission Jammu & Kashmir funded the study. The funding agency was not involved  
21 in study designing, implementation, analysis, or interpretation of the study findings.

### 22 23 **CONTRIBUTORS**

24  
25 S Muhammad Salim Khan: Conceptualization, Funding acquisition, Methodology, Writing-review &  
26 editing.

27  
28 Mariya Amin Qurieshi, Inaamul Haq, Sabhiya Majid: Formal analysis, Data curation, Methodology,  
29 Project administration, Writing-original draft, Writing-review & editing.

30  
31 Javid Ahmad, Taha Ayub, Anjum Bashir, Ashfaq Ahmad Bhat, Abdul Majeed Ganai, Yasmeen Jan, Rauf-  
32 ur-Rashid Kaul, Zahid Ali Khan, Muneer Ahmad Masoodi, Beenish Mushtaq, Fouzia Nazir, Muzamil Nazir,  
33 Malik Waseem Raja, Mahbooba Rasool: Project administration, Supervision, Investigation, Writing-  
34 review & editing.

35  
36 Anjum Asma, Munazza Aziz, Shifana Ayoub, Arif Akbar Bhat, Iqra Nisar Chowdri, Shaista Ismail, Misbah  
37 Ferooz Kawoosa, Mehvish Afzal Khan, Mosin Saleem Khan, Rafiya Kousar, Ab Aziz Lone, Shahroz Nabi,  
38 Mohammad Obaid, Tanzeela Bashir Qazi, Iram Sabah, Ishtiyaq Ahmad Sumji: Supervision, Investigation,  
39 Writing-review & editing.

40  
41 S Muhammad Salim Khan, Mariya Amin Qurieshi, Inaamul Haq, and Sabhiya Majid have verified the  
42 underlying data.

### 43 44 45 **DATA SHARING**

46  
47 Anonymized data collected for the study, including individual participant data and a data dictionary  
48 defining each field in the set, will be made available to interested researchers on request by Inaamul  
49 Haq ([haqinaam@yahoo.co.in](mailto:haqinaam@yahoo.co.in)) for two years from publication. The study protocol, statistical analysis  
50 plan, and informed consent forms are also available from Inaamul Haq.

## REFERENCES

- 1 Timeline of WHO's response to COVID-19. <https://www.who.int/emergencies/diseases/novel-coronavirus-2019/interactive-timeline#!> (accessed 26 Mar 2021).
- 2 Saleem S, Quansar R, Qurieshi M. COVID-19: Preparedness and response by union territory of Jammu and Kashmir for containment of pandemic. *Curr Med Issues* 2020;**18**:206. doi:10.4103/cmi.cmi\_56\_20
- 3 Peirlinck M, Linka K, Sahli Costabal F, *et al.* Visualizing the invisible: The effect of asymptomatic transmission on the outbreak dynamics of COVID-19. *Comput Methods Appl Mech Eng* 2020;**372**. doi:10.1016/j.cma.2020.113410
- 4 Borges LP, Martins AF, de Melo MS, *et al.* Seroprevalence of SARS-CoV-2 IgM and IgG antibodies in an asymptomatic population in Sergipe, Brazil. *Rev Panam Salud Publica/Pan Am J Public Heal* 2020;**44**. doi:10.26633/RPSP.2020.108
- 5 Malani A, Shah D, Kang G, *et al.* Seroprevalence of SARS-CoV-2 in slums versus non-slums in Mumbai, India. *Lancet Glob. Heal.* 2021;**9**:e110–1. doi:10.1016/S2214-109X(20)30467-8
- 6 Capai L, Ayhan N, Masse S, *et al.* Seroprevalence of SARS-CoV-2 IgG Antibodies in Corsica (France), April and June 2020. *J Clin Med* 2020;**9**:3569. doi:10.3390/jcm9113569
- 7 Mahajan S, Srinivasan R, Redlich CA, *et al.* Seroprevalence of SARS-CoV-2-Specific IgG Antibodies Among Adults Living in Connecticut: Post-Infection Prevalence (PIP) Study. *Am J Med* Published Online First: 2020. doi:10.1016/j.amjmed.2020.09.024
- 8 Goldstein E, Lipsitch M, Cevik M. On the Effect of Age on the Transmission of SARS-CoV-2 in Households, Schools, and the Community. *J Infect Dis* 2021;**223**:362–9. doi:10.1093/infdis/jiaa691
- 9 Pan Y, Li X, Yang G, *et al.* Seroprevalence of SARS-CoV-2 immunoglobulin antibodies in Wuhan, China: part of the city-wide massive testing campaign. *Clin Microbiol Infect* 2020;**27**. doi:10.1016/j.cmi.2020.09.044
- 10 Pagani G, Conti F, Giacomelli A, *et al.* Seroprevalence of SARS-CoV-2 significantly varies with age: Preliminary results from a mass population screening. *J. Infect.* 2020;**81**:e10–2. doi:10.1016/j.jinf.2020.09.021
- 11 Vena A, Berruti M, Adessi A, *et al.* Prevalence of Antibodies to SARS-CoV-2 in Italian Adults and Associated Risk Factors. *J Clin Med* 2020;**9**:2780. doi:10.3390/jcm9092780
- 12 Gudbjartsson DF, Norddahl GL, Melsted P, *et al.* Humoral Immune Response to SARS-CoV-2 in Iceland. *N Engl J Med* 2020;**383**:1724–34. doi:10.1056/nejmoa2026116
- 13 Pollán M, Pérez-Gómez B, Pastor-Barriuso R, *et al.* Prevalence of SARS-CoV-2 in Spain (ENE-COVID): a nationwide, population-based seroepidemiological study. *Lancet* 2020;**396**:535–44. doi:10.1016/S0140-6736(20)31483-5
- 14 Stringhini S, Wisniak A, Piumatti G, *et al.* Seroprevalence of anti-SARS-CoV-2 IgG antibodies in Geneva, Switzerland (SEROCoV-POP): a population-based study. *Lancet* 2020;**396**:313–9. doi:10.1016/S0140-6736(20)31304-0
- 15 Clapham H, Hay J, Routledge I, *et al.* Seroepidemiologic study designs for determining SARS-COV-



- 1  
2  
3 2 transmission and immunity. *Emerg. Infect. Dis.* 2020;**26**:1978–86. doi:10.3201/eid2609.201840  
4  
5 16 Census of India Website : Office of the Registrar General & Census Commissioner, India.  
6 <https://www.censusindia.gov.in/> (accessed 26 Mar 2021).  
7  
8 17 Epicollect5 - Free and easy-to-use mobile data-gathering platform. <https://five.epicollect.net/>  
9 (accessed 26 Mar 2021).  
10  
11 18 SARS-CoV-2 Immunoassay | Abbott Core Laboratory.  
12 <https://www.corelaboratory.abbott/us/en/offerings/segments/infectious-disease/sars-cov-2>  
13 (accessed 26 Mar 2021).  
14  
15 19 Census of India Website : Office of the Registrar General & Census Commissioner, India.  
16 [https://censusindia.gov.in/vital\\_statistics/SRS\\_Bulletins/Bulletins.html](https://censusindia.gov.in/vital_statistics/SRS_Bulletins/Bulletins.html) (accessed 26 Mar 2021).  
17  
18 20 Sempos CT, Tian L. Adjusting Coronavirus Prevalence Estimates for Laboratory Test Kit Error. *Am J*  
19 *Epidemiol* 2021;**190**:109–15. doi:10.1093/aje/kwaa174  
20  
21 21 Bendavid E, Mulaney B, Sood N, *et al.* COVID-19 antibody seroprevalence in Santa Clara County,  
22 California. *Int J Epidemiol* Published Online First: 2021. doi:10.1093/ije/dyab010  
23  
24 22 Bryan A, Pepper G, Wener MH, *et al.* Performance characteristics of the Abbott Architect SARS-  
25 CoV-2 IgG assay and seroprevalence in Boise, Idaho. *J Clin Microbiol* 2020;**58**.  
26 doi:10.1128/JCM.00941-20  
27  
28 23 Elzein F, Ibrahim A, Alshahrani F, *et al.* Reinfection, recurrence, or delayed presentation of  
29 COVID-19? Case series and review of the literature. *J Infect Public Health* 2021;**14**.  
30 doi:10.1016/j.jiph.2021.01.002  
31  
32 24 O’Driscoll M, Ribeiro Dos Santos G, Wang L, *et al.* Age-specific mortality and immunity patterns of  
33 SARS-CoV-2. *Nature* 2021;**590**:140–5. doi:10.1038/s41586-020-2918-0  
34  
35 25 Kadambari S, Klenerman P, Pollard AJ. Why the elderly appear to be more severely affected by  
36 COVID-19: The potential role of immunosenescence and CMV. *Rev. Med. Virol.* 2020;**30**.  
37 doi:10.1002/rmv.2144  
38  
39 26 Pawelec G, Weng NP. Can an effective SARS-CoV-2 vaccine be developed for the older  
40 population? *Immun. Ageing.* 2020;**17**. doi:10.1186/s12979-020-00180-2  
41  
42 27 Naranbhai V, Chang CC, Beltran WFG, *et al.* High seroprevalence of anti-SARS-CoV-2 antibodies in  
43 Chelsea, Massachusetts. *J Infect Dis* 2020;**222**:1955–9. doi:10.1093/infdis/jiaa579  
44  
45 28 Yang J, Zheng Y, Gou X, *et al.* Prevalence of comorbidities and its effects in coronavirus disease  
46 2019 patients: A systematic review and meta-analysis. *Int J Infect Dis* 2020;**94**:91–5.  
47 doi:10.1016/j.ijid.2020.03.017  
48  
49 29 Vabret N. Antibody responses to SARS-CoV-2 short-lived. *Nat Rev Immunol* 2020;**20**:519.  
50 doi:10.1038/s41577-020-0405-3  
51  
52 30 McCulloh I, Kiernan K, Kent T. Inferring True COVID19 Infection Rates From Deaths. *Front Big*  
53 *Data* 2020;**3**. doi:10.3389/fdata.2020.565589  
54  
55 31 Gu X, Mukherjee B, Das S, *et al.* COVID-19 prediction in South Africa: Understanding the  
56 unascertained cases - The hidden part of the epidemiological iceberg. medRxiv. 2020.  
57  
58 13

1  
2  
3 doi:10.1101/2020.12.10.20247361  
4  
5  
6  
7

8 **Figure 1 legend:**

9  
10 Figure 1: Participant flow.  
11  
12  
13  
14  
15  
16  
17  
18  
19  
20  
21  
22  
23  
24  
25  
26  
27  
28  
29  
30  
31  
32  
33  
34  
35  
36  
37  
38  
39  
40  
41  
42  
43  
44  
45  
46  
47  
48  
49  
50  
51  
52  
53  
54  
55  
56  
57

Figure 1: Participant flow

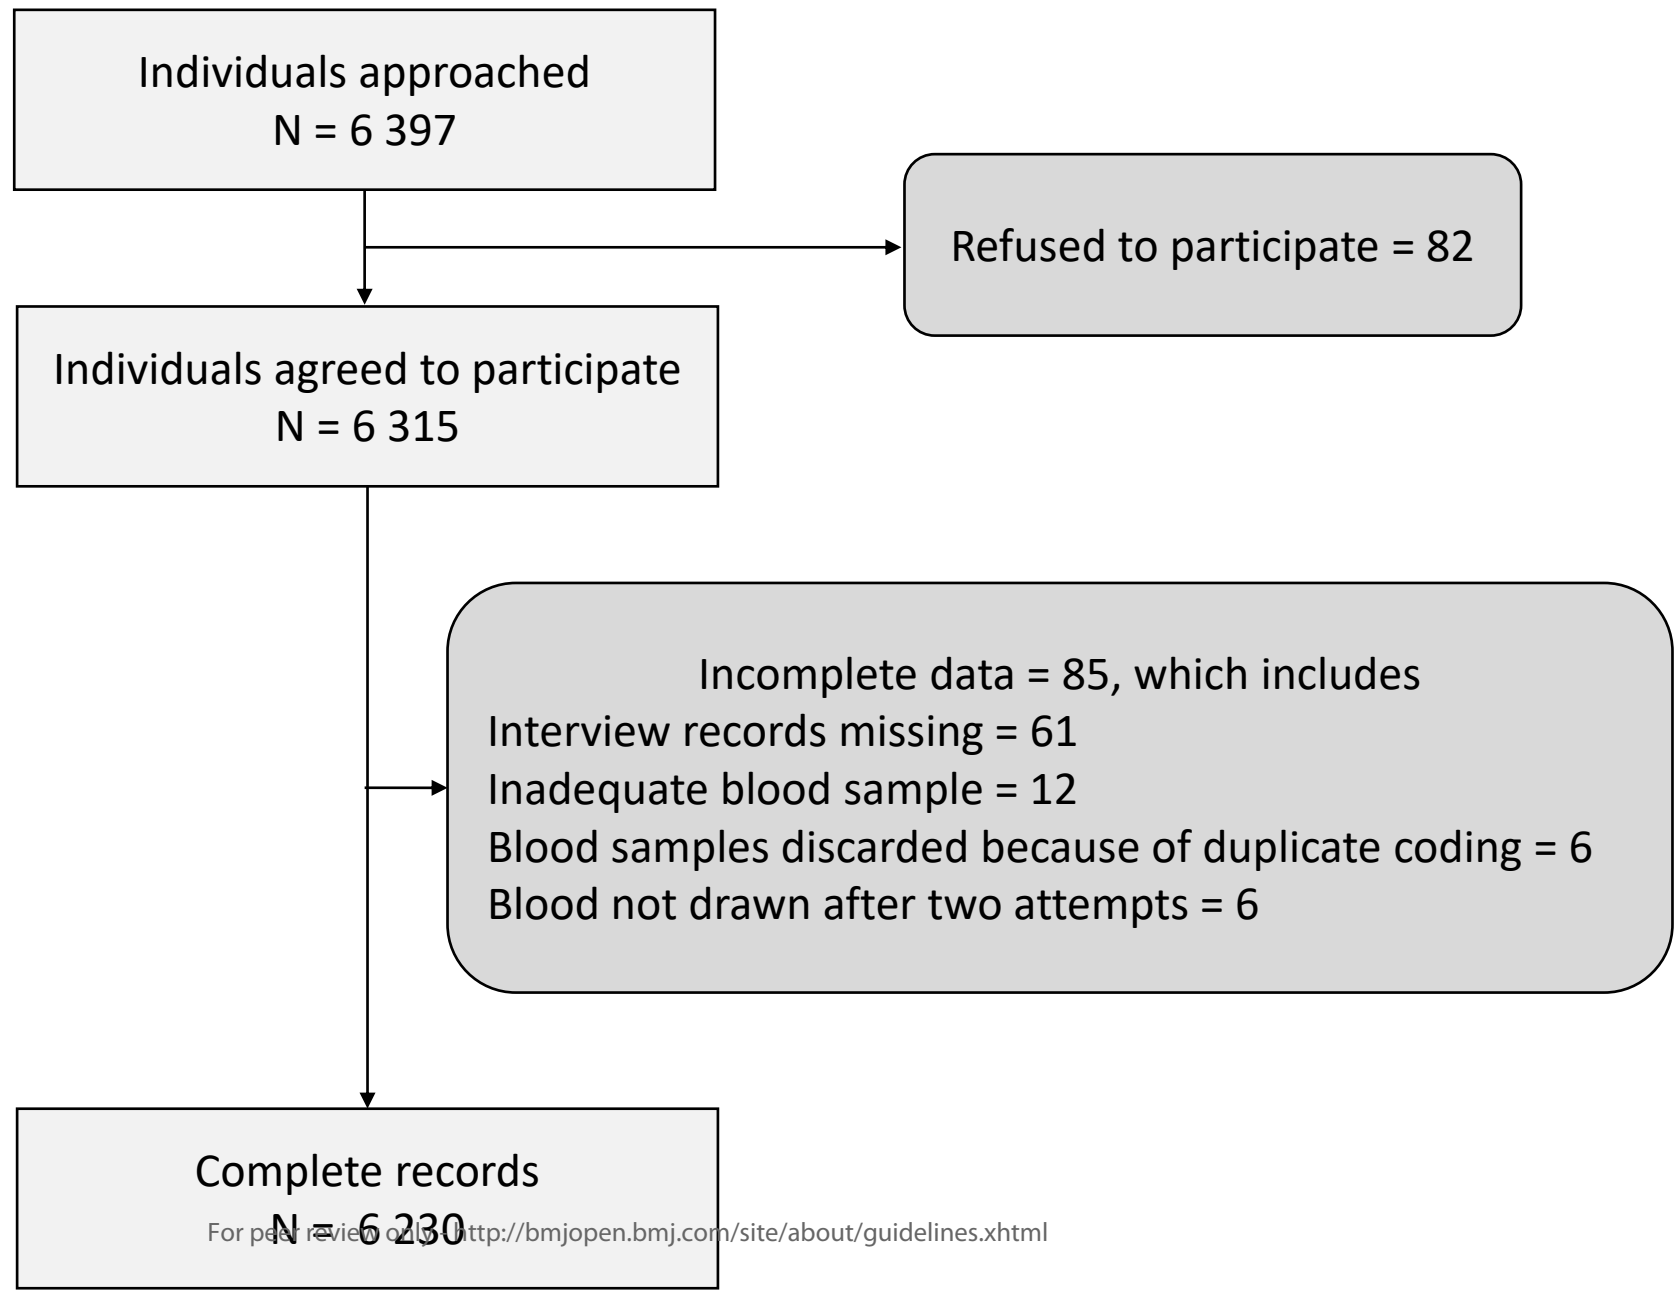

1  
2  
3  
4  
5  
6  
7  
8  
9  
10  
11  
12  
13  
14  
15  
16  
17  
18  
19  
20  
21  
22  
23  
24  
25  
26  
27  
28  
29  
30  
31  
32  
33  
34  
35  
36  
37  
38  
39  
40  
41

## Chronic disease and SARS-CoV-2 infection in the study population

Of the 6230 participants, 1145 reported a history of at least one chronic disease. Two hundred ninety-eight reported a history of more than one chronic disease.

**Supplementary Table 1: Chronic disease in the study population**

| Chronic disease (n = 1145)            | Number (%)  |
|---------------------------------------|-------------|
| Hypertension                          | 815 (13.1%) |
| Diabetes                              | 314 (5.0%)  |
| Chronic Obstructive Pulmonary Disease | 39 (0.6%)   |
| Coronary Heart Disease                | 35 (0.6%)   |
| Cerebrovascular Disease               | 16 (0.3%)   |
| Asthma                                | 15 (0.2%)   |
| Chronic Kidney Disease                | 10 (0.2%)   |
| Chronic Liver Disease                 | 5 (0.1%)    |
| Cancer                                | 4 (0.1%)    |

**Supplementary Table 2: History of COVID-19 like symptoms and seropositivity vis-à-vis history of chronic disease**

|                                                               |                     | History of COVID-19 like symptoms |      |
|---------------------------------------------------------------|---------------------|-----------------------------------|------|
|                                                               |                     | Yes                               | No   |
| ..                                                            | ..                  |                                   |      |
| <b>Reported history of chronic disease (n=1145)</b>           | <b>Seropositive</b> | 78                                | 417  |
| ..                                                            | <b>Seronegative</b> | 63                                | 587  |
| <b>Did not report any history of chronic disease (n=5085)</b> | <b>Seropositive</b> | 169                               | 1751 |
| ..                                                            | <b>Seronegative</b> | 164                               | 3001 |

Of the 1154 participants who reported a history of chronic disease 78 (6.8%) reported a history of COVID-19 like symptoms within three months of the interview date and were seropositive for SARS-CoV-2 specific IgG (symptomatic infection). The proportion of symptomatic infection among participants who did not report any history of chronic disease was 3.3% (169/5085).

STROBE Statement—Checklist of items that should be included in reports of *cross-sectional studies*

|                              | Item No | Recommendation                                                                                                                                                                                    | Page No              |
|------------------------------|---------|---------------------------------------------------------------------------------------------------------------------------------------------------------------------------------------------------|----------------------|
| <b>Title and abstract</b>    | 1       | (a) Indicate the study's design with a commonly used term in the title or the abstract                                                                                                            | 1, 3                 |
|                              |         | (b) Provide in the abstract an informative and balanced summary of what was done and what was found                                                                                               | 2                    |
| <b>Introduction</b>          |         |                                                                                                                                                                                                   |                      |
| Background/rationale         | 2       | Explain the scientific background and rationale for the investigation being reported                                                                                                              | 3                    |
| Objectives                   | 3       | State specific objectives, including any prespecified hypotheses                                                                                                                                  | 3                    |
| <b>Methods</b>               |         |                                                                                                                                                                                                   |                      |
| Study design                 | 4       | Present key elements of study design early in the paper                                                                                                                                           | 3                    |
| Setting                      | 5       | Describe the setting, locations, and relevant dates, including periods of recruitment, exposure, follow-up, and data collection                                                                   | 3                    |
| Participants                 | 6       | (a) Give the eligibility criteria, and the sources and methods of selection of participants                                                                                                       | 4                    |
| Variables                    | 7       | Clearly define all outcomes, exposures, predictors, potential confounders, and effect modifiers. Give diagnostic criteria, if applicable                                                          | 4                    |
| Data sources/<br>measurement | 8*      | For each variable of interest, give sources of data and details of methods of assessment (measurement). Describe comparability of assessment methods if there is more than one group              | 4                    |
| Bias                         | 9       | Describe any efforts to address potential sources of bias                                                                                                                                         | 4, 5                 |
| Study size                   | 10      | Explain how the study size was arrived at                                                                                                                                                         | 4                    |
| Quantitative variables       | 11      | Explain how quantitative variables were handled in the analyses. If applicable, describe which groupings were chosen and why                                                                      | 4                    |
| Statistical methods          | 12      | (a) Describe all statistical methods, including those used to control for confounding                                                                                                             | 4, 5                 |
|                              |         | (b) Describe any methods used to examine subgroups and interactions                                                                                                                               | 5                    |
|                              |         | (c) Explain how missing data were addressed                                                                                                                                                       | 5                    |
|                              |         | (d) If applicable, describe analytical methods taking account of sampling strategy                                                                                                                | 4, 5                 |
|                              |         | (e) Describe any sensitivity analyses                                                                                                                                                             | -                    |
| <b>Results</b>               |         |                                                                                                                                                                                                   |                      |
| Participants                 | 13*     | (a) Report numbers of individuals at each stage of study—eg numbers potentially eligible, examined for eligibility, confirmed eligible, included in the study, completing follow-up, and analysed | Figure 1, and page 5 |
|                              |         | (b) Give reasons for non-participation at each stage                                                                                                                                              | Figure 1             |
|                              |         | (c) Consider use of a flow diagram                                                                                                                                                                | Figure 1             |
| Descriptive data             | 14*     | (a) Give characteristics of study participants (eg demographic, clinical, social) and information on exposures and potential confounders                                                          | Table 1              |
|                              |         | (b) Indicate number of participants with missing data for each variable of interest                                                                                                               | Table 1, Figure 1    |
| Outcome data                 | 15*     | Report numbers of outcome events or summary measures                                                                                                                                              | Table 2              |

1  
2  
3  
4  
5  
6  
7  
8  
9  
10  
11  
12  
13  
14  
15  
16  
17  
18  
19  
20  
21  
22  
23  
24  
25  
26  
27  
28  
29  
30  
31  
32  
33  
34  
35  
36  
37  
38  
39  
40  
41  
42  
43  
44  
45  
46  
47  
48  
49  
50  
51  
52  
53  
54  
55  
56  
57  
58  
59  
60

|                          |    |                                                                                                                                                                                                              |            |
|--------------------------|----|--------------------------------------------------------------------------------------------------------------------------------------------------------------------------------------------------------------|------------|
| Main results             | 16 | (a) Give unadjusted estimates and, if applicable, confounder-adjusted estimates and their precision (eg, 95% confidence interval). Make clear which confounders were adjusted for and why they were included | Table 2    |
|                          |    | (b) Report category boundaries when continuous variables were categorized                                                                                                                                    | Table 1, 2 |
|                          |    | (c) If relevant, consider translating estimates of relative risk into absolute risk for a meaningful time period                                                                                             | -          |
| Other analyses           | 17 | Report other analyses done—eg analyses of subgroups and interactions, and sensitivity analyses                                                                                                               | Table 2    |
| <b>Discussion</b>        |    |                                                                                                                                                                                                              |            |
| Key results              | 18 | Summarise key results with reference to study objectives                                                                                                                                                     | 9          |
| Limitations              | 19 | Discuss limitations of the study, taking into account sources of potential bias or imprecision. Discuss both direction and magnitude of any potential bias                                                   | 10         |
| Interpretation           | 20 | Give a cautious overall interpretation of results considering objectives, limitations, multiplicity of analyses, results from similar studies, and other relevant evidence                                   | 9, 10      |
| Generalisability         | 21 | Discuss the generalisability (external validity) of the study results                                                                                                                                        | 9          |
| <b>Other information</b> |    |                                                                                                                                                                                                              |            |
| Funding                  | 22 | Give the source of funding and the role of the funders for the present study and, if applicable, for the original study on which the present article is based                                                | 11         |

\*Give information separately for exposed and unexposed groups.

# BMJ Open

## Seroprevalence of SARS-CoV-2 specific IgG antibodies in Kashmir, India, seven months after the first reported local COVID-19 case: results of a population-based seroprevalence survey from October-November, 2020

|                               |                                                                                                                                                                                                                                                                                                                                                                                                                                                                                                                                                                                                                                                                                                                                                                                                                                                                                                                                                                                                                                                                                                                                                                                                                                                                                                                                                                                                                                                                                                                                                                                                                                                                                                                                                                                                                                                                           |
|-------------------------------|---------------------------------------------------------------------------------------------------------------------------------------------------------------------------------------------------------------------------------------------------------------------------------------------------------------------------------------------------------------------------------------------------------------------------------------------------------------------------------------------------------------------------------------------------------------------------------------------------------------------------------------------------------------------------------------------------------------------------------------------------------------------------------------------------------------------------------------------------------------------------------------------------------------------------------------------------------------------------------------------------------------------------------------------------------------------------------------------------------------------------------------------------------------------------------------------------------------------------------------------------------------------------------------------------------------------------------------------------------------------------------------------------------------------------------------------------------------------------------------------------------------------------------------------------------------------------------------------------------------------------------------------------------------------------------------------------------------------------------------------------------------------------------------------------------------------------------------------------------------------------|
| Journal:                      | <i>BMJ Open</i>                                                                                                                                                                                                                                                                                                                                                                                                                                                                                                                                                                                                                                                                                                                                                                                                                                                                                                                                                                                                                                                                                                                                                                                                                                                                                                                                                                                                                                                                                                                                                                                                                                                                                                                                                                                                                                                           |
| Manuscript ID                 | bmjopen-2021-053791.R1                                                                                                                                                                                                                                                                                                                                                                                                                                                                                                                                                                                                                                                                                                                                                                                                                                                                                                                                                                                                                                                                                                                                                                                                                                                                                                                                                                                                                                                                                                                                                                                                                                                                                                                                                                                                                                                    |
| Article Type:                 | Original research                                                                                                                                                                                                                                                                                                                                                                                                                                                                                                                                                                                                                                                                                                                                                                                                                                                                                                                                                                                                                                                                                                                                                                                                                                                                                                                                                                                                                                                                                                                                                                                                                                                                                                                                                                                                                                                         |
| Date Submitted by the Author: | 14-Jul-2021                                                                                                                                                                                                                                                                                                                                                                                                                                                                                                                                                                                                                                                                                                                                                                                                                                                                                                                                                                                                                                                                                                                                                                                                                                                                                                                                                                                                                                                                                                                                                                                                                                                                                                                                                                                                                                                               |
| Complete List of Authors:     | <p>Khan, S Muhammad; Government Medical College Srinagar, Community Medicine</p> <p>Qurieshi, Mariya; Government Medical College Srinagar, Community Medicine</p> <p>Haq, Inaamul; Government Medical College Srinagar, Community Medicine</p> <p>Majid, Sabhiya; Government Medical College Srinagar, Biochemistry</p> <p>Ahmad, Javid; Sher-i-Kashmir Institute of Medical Sciences, Community Medicine</p> <p>Ayub, Taha; Government Medical College Srinagar, Community Medicine</p> <p>Bhat, Ashfaq; SKIMS Medical College Srinagar, Community Medicine</p> <p>Fazili, Anjum; Sher-i-Kashmir Institute of Medical Sciences, Community Medicine</p> <p>Ganai, Abdul; Government Medical College Baramulla, Community Medicine</p> <p>Jan, Yasmeen; SKIMS Medical College Srinagar, Community Medicine</p> <p>Kaul, Rauf-ur-Rashid; Sher-i-Kashmir Institute of Medical Sciences, Community Medicine</p> <p>Khan, Zahid; Government Medical College Baramulla, Community Medicine</p> <p>Masoodi, Muneer; Government Medical College Anantnag, Community Medicine</p> <p>Mushtaq, Beenish; SKIMS Medical College Srinagar, Community Medicine</p> <p>Nazir, Fouzia; Government Medical College Anantnag, Community Medicine</p> <p>Nazir, Muzamil; Government Medical College Baramulla, Community Medicine</p> <p>Raja, Malik; Government Medical College Srinagar, Community Medicine</p> <p>Rasool, Mahbooba; Government Medical College Anantnag, Community Medicine</p> <p>Asma, Anjum; Government Medical College Srinagar, Community Medicine</p> <p>Ayoub, Shifana; Government Medical College Srinagar, Community Medicine</p> <p>Aziz, Munazza; Government of Jammu and Kashmir Directorate of Health Services</p> <p>Bhat, Arif; Government Medical College Srinagar, Biochemistry</p> <p>Chowdri, Iqra; Government Medical College Srinagar, Community</p> |



|                                    |                                                                                                                                                                                                                                                                                                                                                                                                                                                                                                                                                                                                                                                                                                                                                                                                                                                                     |
|------------------------------------|---------------------------------------------------------------------------------------------------------------------------------------------------------------------------------------------------------------------------------------------------------------------------------------------------------------------------------------------------------------------------------------------------------------------------------------------------------------------------------------------------------------------------------------------------------------------------------------------------------------------------------------------------------------------------------------------------------------------------------------------------------------------------------------------------------------------------------------------------------------------|
|                                    | Medicine<br>Ismail, Shaista; Government Medical College Srinagar, Community<br>Medicine<br>Kawoosa, Misbah; Government Medical College Srinagar, Community<br>Medicine<br>Khan, Mehvish; Government Medical College Srinagar, Community<br>Medicine<br>Khan, Mosin; Government Medical College Srinagar, Biochemistry<br>Kousar, Rafiya; Government Medical College Srinagar, Community<br>Medicine<br>Lone, Ab; Government Medical College Srinagar, Community Medicine<br>Nabi, Shahroz; Government Medical College Srinagar, Community<br>Medicine<br>Obaid, Mohammad; Government Medical College Srinagar, Biochemistry<br>Qazi, Tanzeela; Government Medical College Srinagar, Community<br>Medicine<br>Sabah, Iram; Government Medical College Srinagar, Community<br>Medicine<br>Sumji, Ishtiyag; Government Medical College Srinagar, Community<br>Medicine |
| <b>Primary Subject<br>Heading</b>: | Infectious diseases                                                                                                                                                                                                                                                                                                                                                                                                                                                                                                                                                                                                                                                                                                                                                                                                                                                 |
| Secondary Subject Heading:         | Epidemiology                                                                                                                                                                                                                                                                                                                                                                                                                                                                                                                                                                                                                                                                                                                                                                                                                                                        |
| Keywords:                          | COVID-19, EPIDEMIOLOGY, Epidemiology < INFECTIOUS DISEASES                                                                                                                                                                                                                                                                                                                                                                                                                                                                                                                                                                                                                                                                                                                                                                                                          |
|                                    |                                                                                                                                                                                                                                                                                                                                                                                                                                                                                                                                                                                                                                                                                                                                                                                                                                                                     |

SCHOLARONE™  
Manuscripts

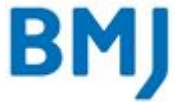

I, the Submitting Author has the right to grant and does grant on behalf of all authors of the Work (as defined in the below author licence), an exclusive licence and/or a non-exclusive licence for contributions from authors who are: i) UK Crown employees; ii) where BMJ has agreed a CC-BY licence shall apply, and/or iii) in accordance with the terms applicable for US Federal Government officers or employees acting as part of their official duties; on a worldwide, perpetual, irrevocable, royalty-free basis to BMJ Publishing Group Ltd ("BMJ") its licensees and where the relevant Journal is co-owned by BMJ to the co-owners of the Journal, to publish the Work in this journal and any other BMJ products and to exploit all rights, as set out in our [licence](#).

The Submitting Author accepts and understands that any supply made under these terms is made by BMJ to the Submitting Author unless you are acting as an employee on behalf of your employer or a postgraduate student of an affiliated institution which is paying any applicable article publishing charge ("APC") for Open Access articles. Where the Submitting Author wishes to make the Work available on an Open Access basis (and intends to pay the relevant APC), the terms of reuse of such Open Access shall be governed by a Creative Commons licence – details of these licences and which [Creative Commons](#) licence will apply to this Work are set out in our licence referred to above.

Other than as permitted in any relevant BMJ Author's Self Archiving Policies, I confirm this Work has not been accepted for publication elsewhere, is not being considered for publication elsewhere and does not duplicate material already published. I confirm all authors consent to publication of this Work and authorise the granting of this licence.

1  
2  
3 **Seroprevalence of SARS-CoV-2 specific IgG antibodies in Kashmir, India, seven months after the first**  
4 **reported local COVID-19 case: results of a population-based seroprevalence survey from October-**  
5 **November, 2020**  
6

7 S Muhammad Salim Khan,<sup>1</sup> Mariya Amin Qurieshi,<sup>1</sup> Inaamul Haq,<sup>1</sup> Sabhiya Majid,<sup>2</sup> Javid Ahmad,<sup>3\*</sup> Taha  
8 Ayub,<sup>1\*</sup> Ashfaq Ahmad Bhat,<sup>4\*</sup> Anjum Bashir Fazili,<sup>3\*</sup> Abdul Majeed Ganai,<sup>5\*</sup> Yasmeen Jan,<sup>4\*</sup> Rauf-ur-  
9 Rashid Kaul,<sup>3\*</sup> Zahid Ali Khan,<sup>5\*</sup> Muneer Ahmad Masoodi,<sup>6\*</sup> Beenish Mushtaq,<sup>4\*</sup> Fouzia Nazir,<sup>6\*</sup> Muzamil  
10 Nazir,<sup>5\*</sup> Malik Waseem Raja,<sup>1\*</sup> Mahbooba Rasool,<sup>6\*</sup> Anjum Asma,<sup>1†</sup> Shifana Ayoub,<sup>1†</sup> Munazza Aziz,<sup>7†</sup> Arif  
11 Akbar Bhat,<sup>2†</sup> Iqra Nisar Chowdri,<sup>1†</sup> Shaista Ismail,<sup>1†</sup> Misbah Ferooz Kawoosa,<sup>1†</sup> Mehvish Afzal Khan,<sup>1†</sup>  
12 Mosin Saleem Khan,<sup>2†</sup> Rafiya Kousar,<sup>1†</sup> Ab Aziz Lone,<sup>1†</sup> Shahroz Nabi,<sup>1†</sup> Mohammad Obaid,<sup>1†</sup> Tanzeela  
13 Bashir Qazi,<sup>1†</sup> Iram Sabah,<sup>1†</sup> Ishtiyah Ahmad Sumji<sup>1†</sup>  
14

15  
16 \*Authors in alphabetical order, Contributed equally

17  
18 †Authors in alphabetical order, Contributed equally

19  
20 Corresponding author:

21  
22 Dr. Inaamul Haq, Department of Community Medicine, Government Medical College, Srinagar, Jammu &  
23 Kashmir, 190010, India. Email: [haqinaam@yahoo.co.in](mailto:haqinaam@yahoo.co.in)  
24

25 Affiliation

26  
27 <sup>1</sup> Department of Community Medicine, Government Medical College Srinagar, Jammu & Kashmir, India

28  
29 <sup>2</sup> Department of Biochemistry, Government Medical College, Srinagar, Jammu & Kashmir, India

30  
31 <sup>3</sup> Department of Community Medicine, Sher-i-Kashmir Institute of Medical Sciences, Srinagar, Jammu &  
32 Kashmir, India

33  
34 <sup>4</sup> Department of Community Medicine, SKIMS Medical College, Srinagar, Jammu & Kashmir, India

35  
36 <sup>5</sup> Department of Community Medicine, Government Medical College Baramulla, Jammu & Kashmir, India

37  
38 <sup>6</sup> Department of Community Medicine, Government Medical College Anantnag, Jammu & Kashmir, India

39  
40 <sup>7</sup> Directorate of Health Services Kashmir, Government of Jammu & Kashmir, India

41  
42 Word Count: 3353 (excluding abstract, tables, and references)  
43  
44  
45  
46  
47  
48  
49  
50  
51  
52  
53  
54  
55  
56  
57  
58  
59  
60

## ABSTRACT

**Objectives:** We designed a population-based survey in Kashmir to estimate the seroprevalence of SARS-CoV-2 specific IgG antibodies in the general population aged 18 years and above.

**Setting:** The survey was conducted among 110 villages and urban wards across ten districts in Kashmir from 17 Oct 2020 to 04 Nov 2020.

**Participants:** Individuals aged 18 years and above were eligible to be included in the survey. Serum samples were tested for the presence of SARS-CoV-2 specific IgG antibodies using the Abbott SARS-CoV-2 IgG assay.

**Primary and secondary outcome measures:** We labeled assay results equal to or above the cut-off index value of 1.4 as positive for SARS-CoV-2 specific IgG antibodies. Seroprevalence estimates were adjusted for the sampling design and assay characteristics.

**Results:** Out of 6397 eligible individuals enumerated, 6315 (98.7%) agreed to participate. The final analysis was done on 6230 participants. Seroprevalence adjusted for the sampling design and assay characteristics was 36.7% (95% CI 34.3%-39.2%). Seroprevalence was higher among the older population. Among seropositive individuals, 10.2% (247/2415) reported a history of COVID-19 like symptoms. Out of 474 symptomatic individuals, 233 (49.2%) reported having been tested. We estimated an infection fatality rate of 0.034%.

**Conclusions:** During the first seven months of the COVID-19 epidemic in Kashmir valley, approximately 37% of individuals were infected. A large proportion of the population remains susceptible to the infection. The experience of a second wave of COVID-19 in April-June 2021, the appearance of virus variants, and the introduction of vaccination programs warrant robust surveillance of the epidemic.

## ARTICLE SUMMARY

### Strengths and limitations of this study

- The findings of our study are based on a representative sample of the population.
- The laboratory test used for the detection of SARS-CoV-2 specific IgG antibodies in serum samples provides valid results.
- We report seroprevalence estimates adjusted for sampling design and test performance.
- Even though we adjusted the weighted seroprevalence estimates for test performance using manufacturer-provided sensitivity and specificity (100% and 99.63% respectively), we did not quantify the test validity in-house.
- Because of lack of age- and gender-specific mortality data we could not estimate age- and gender-specific infection fatality rates.

## INTRODUCTION

On 11 Feb 2020, the World Health Organization announced that the disease caused by the Severe Acute Respiratory Syndrome Coronavirus 2 (SARS-CoV-2) will be named coronavirus disease (COVID-19).[1] In Kashmir, the first case of COVID-19 was confirmed in Srinagar city on 18 Mar 2020.[2] The government imposed the first phase of the lockdown in Kashmir on 24 March 2020. During this phase, inter-state travel remained suspended. People were barred from moving outside except in an emergency. Except

1  
2  
3 for essential services, all government and private offices were advised to work from home. Universal  
4 masking was made mandatory. The lockdown was extended till 31 May 2020 and later relaxed in a  
5 phased manner.  
6

7 Mild or asymptomatic infections are common in Coronavirus disease 2019 (COVID-19) and are an  
8 important source of infection transmission.[3,4] Such cases are less likely to be detected by a  
9 surveillance system based on reverse-transcriptase polymerase chain reaction (RT-PCR) testing. The  
10 number of reported RT-PCR positive cases are an underestimate of the true number of infections in a  
11 population.  
12  
13

14 Seroprevalence surveys have been conducted in various countries at different stages of the current  
15 epidemic among various population groups.[5–14] Seroprevalence surveys provide a more accurate  
16 estimate of past infection, improve understanding of the infection transmission dynamics, and guide  
17 public health response.[15]  
18

19 We designed this survey with the primary objective to estimate the seroprevalence of severe acute  
20 respiratory syndrome coronavirus 2 (SARS-CoV-2) specific IgG antibodies in the adult population of  
21 Kashmir valley.  
22  
23

## 24 **METHODS**

25  
26 We designed a population-based cross-sectional study. The study covered all the ten districts of  
27 Kashmir, a valley in northern India. (Figure 1) We completed data collection in three weeks, from 17 Oct  
28 2020 to 04 Nov 2020.  
29

### 30 **Ethics**

31  
32 We obtained written informed consent from all study participants. The study was approved by the  
33 Institutional Ethics Committee of Government Medical College Srinagar (reference number:  
34 1004/ETH/GMC). We used anonymized participant data for analysis.  
35

### 36 **Sample size**

37  
38 Based on the results of a previous study conducted in July 2020, we speculated that, by October 2020,  
39 the prevalence would have increased to around 20%.[16] We calculated the minimum sample size based  
40 on an anticipated seroprevalence of 20%, an absolute precision of 2%, and a design effect of 2. We used  
41 OpenEpi to make sample size calculations.[17] We adjusted the sample size for a possible non-response  
42 of 10% to obtain a minimum size of 3376. We decided to select 3600 individuals from nine of the ten  
43 districts (except district Srinagar). To obtain precise estimates for district Srinagar, sample size  
44 estimation was made for the district separately. We used a design effect of 1.5, an anticipated  
45 seroprevalence of 20%, and absolute precision of 2% to obtain a sample size of 2302 for the district,  
46 which was further increased to 2400 to account for non-response. We thus targeted a total sample size  
47 of 6000 (3600 + 2400).  
48  
49  
50

### 51 **Participants**

52  
53 All adults  $\geq 18$  years of age were eligible to participate in the study. We selected eligible participants  
54 using a three-stage stratified cluster sampling technique. We listed all clusters in the valley using the  
55 Census 2011 data.[18] Within each of the ten districts in the valley, clusters were stratified into urban  
56  
57

1  
2  
3 and rural clusters. We selected clusters within each of the 20 strata by probability proportionate to size  
4 (PPS) sampling. Except for district Srinagar which we oversampled to obtain precise seroprevalence  
5 estimates for, ten clusters were randomly selected from each district. We selected 20 clusters from  
6 district Srinagar. We divided each selected cluster into four equal areas and chose a central location  
7 within each of the four areas as the starting point. Thereafter, we approached consecutive households  
8 to enroll at least ten eligible participants. We thus identified a total of 440 random locations within 110  
9 clusters in ten districts. We invited all eligible adults in a household for participation.  
10  
11

## 12 **Variables**

13  
14 The main outcome variable of interest was SARS-CoV-2 specific IgG antibodies. We obtained information  
15 from participants about their age, gender, history of COVID-19 like symptoms in the three months  
16 before the interview date, history of contact with a known COVID-19 patient, and history of COVID-19  
17 testing.  
18

## 19 **Procedure**

20  
21 We informed eligible adults about the purpose and the procedure of the study. Study participation was  
22 voluntary. Participants were interviewed by health personnel specifically trained for the interview.  
23 Interview responses were recorded in an Epicollect5 form.[19] Once the interview was completed, a  
24 trained phlebotomist collected 3-5 mL of venous blood from the antecubital vein under aseptic  
25 precautions into a red-top collection tube containing a clot activator. The tube was left standing,  
26 undisturbed, for at least 30 minutes for clot formation. The sample was later transported to a central  
27 facility for centrifugation. Centrifuged samples were transported to a central laboratory for further  
28 processing and analysis. Serum samples were tested for the presence of SARS-CoV-2 specific IgG  
29 antibodies using the Abbott SARS-CoV-2 IgG assay. The assay uses chemiluminescence to detect IgG  
30 antibodies against the SARS-CoV-2 nucleocapsid protein. The reported sensitivity and specificity of the  
31 assay are 100% (95% CI 95.89-100.00) and 99.63% (99.05-99.90), respectively.[20] As recommended by  
32 the manufacturer, we labeled assay results equal to or above the cut-off index value of 1.4 as positive  
33 for SARS-CoV-2 specific IgG antibodies.  
34  
35  
36  
37

## 38 **Statistical methods**

39  
40 We report unweighted seroprevalence estimates in percentages. We used the Agresti-Coull procedure  
41 to calculate a 95% confidence interval (CI) for seroprevalence estimates.[21] A weighted estimate of  
42 seroprevalence is provided. To calculate survey weights (inverse of sampling probability) we used the  
43 estimated population of the districts. We used the census 2011 data and growth rates from Sample  
44 Registration System to estimate the population of the districts in 2020.[18,22] Survey weights so  
45 obtained were further adjusted for non-response and age and sex structure (post-stratification weights).  
46 We further adjusted the weighted seroprevalence estimates for test performance to calculate  
47 “weighted seroprevalence adjusted for test performance”. We did this using the formula:  
48 *Weighted seroprevalence adjusted for test performance* =  
49  $(\text{Weighted seroprevalence} + \text{Test specificity} - 1) / (\text{Test sensitivity} + \text{Test specificity} - 1)$ . [23]  
50  
51

52 We used the manufacturer-provided sensitivity and specificity in the above formula.[20] We used the  
53 lower and upper bounds of the manufacturer-provided test performance to report sensitivity analyses.  
54  
55  
56  
57

We analyzed the difference in seroprevalence estimates across levels of a categorical variable using a Chi-square test adjusted for the sampling design.

We estimated the number of SARS-CoV-2 infections by multiplying the weighted seroprevalence adjusted for test performance with the estimated population of the valley. To estimate the number of infections per reported case, we divided the estimated number of SARS-CoV-2 infections by the reported number of COVID-19 cases two weeks before the survey date. We calculated the infection fatality rate by dividing the reported number of deaths by the number of estimated infections, assuming a three-week lag time from infection to death.[24]

We analyzed the data using Stata version 15 (StataCorp. 2017. Stata Statistical Software: Release 15. College Station, TX: StataCorp LP.).

### Patient and Public Involvement

No patients or members of the public were involved in this study.

### RESULTS

We enumerated 6 397 individuals  $\geq 18$  years from 3 077 households and 110 clusters (34 urban clusters and 76 rural clusters) between 17 Oct 2020 and 04 Nov 2020. Out of the 6 397 eligible individuals, 6 315 (98.7%) agreed to participate and were enrolled. The final analysis was done on a sample of 6 230 participants. (Figure 2)

Of the 6 230 participants, 1 513 (24.3%) were between 18 and 30 years of age, 2 672 (42.9%) were aged 30-49 years, 1 643 (26.4%) were aged 50-69 years, and 402 (6.4%) were 70 years and older. (Table 1). There was equal representation from males and females, and 3 364 (54.0%) resided in a rural area. Of the 3 104 females, 56 (1.8%) reported pregnant at the time of the survey. Four hundred seventy-four (7.6%) reported COVID-19 like symptoms in the three months preceding the survey and 439 (7.0%) reported to have ever come in contact with a known COVID-19 case. One thousand ninety-two (17.5%) reported having been tested for COVID-19 using RT-PCR or a Rapid Antigen Test (RAT) previously, of whom 176 (16.2%) reported to have tested positive for the disease.

**Table 1: Characteristics of study participants**

|                   | Frequency | Percent |
|-------------------|-----------|---------|
| <b>Total</b>      | 6230      |         |
| <b>Age, years</b> |           |         |
| 18-29             | 1513      | 24.3    |
| 30-49             | 2672      | 42.9    |
| 50-69             | 1643      | 26.4    |
| $\geq 70$         | 402       | 6.5     |
| <b>Gender</b>     |           |         |
| Male              | 3126      | 50.2    |
| Female            | 3104      | 49.8    |
| <b>Residence</b>  |           |         |
| Urban             | 2866      | 46.0    |
| Rural             | 3364      | 54.0    |

|                                                      |      |      |
|------------------------------------------------------|------|------|
| <b>Pregnant (n=3104)</b>                             | 56   | 1.8  |
| <b>Self-reported history of chronic disease</b>      | 1145 | 18.4 |
| <b>History of COVID-19 like symptoms</b>             | 474  | 7.6  |
| <b>History of contact with a known COVID-19 case</b> | 439  | 7.0  |
| <b>Ever tested for COVID-19 (RT-PCR)</b>             | 1092 | 17.5 |
| <b>RT-PCR result (n=1088*)</b>                       |      |      |
| Positive                                             | 176  | 16.2 |
| Negative                                             | 912  | 83.8 |

COVID-19: Coronavirus disease; RT-PCR: Reverse transcriptase-polymerase chain reaction

\*RT-PCR result not known in four participants

We found an overall unweighted seroprevalence of 38.8% (95% CI 37.6 – 40.0). The seroprevalence ranged from 28.5% in district Kulgam to 43.1% in district Pulwama. (Figure 1 and online supplemental file 1) The overall weighted seroprevalence (adjusted for sampling design) was 36.9% (95% CI 34.5 – 39.4). The weighted seroprevalence adjusted for test performance was 36.7% (95% CI 34.3 – 39.2). (Table 2) Upon sensitivity analyses, the weighted seroprevalence adjusted for test performance ranged from 36.3% (95% CI 33.9 – 38.8) to 38.4% (95% CI 35.9 – 41.0). (Table 3)

**Table 2: Seroprevalence of SARS-CoV-2 specific IgG antibodies by participant characteristics**

|                   | Number tested | Number seropositive | Unweighted seroprevalence, % (95% CI) | Weighted seroprevalence, % (95% CI) | Weighted seroprevalence adjusted for test performance, % (95% CI) | Design-based F, p-value |
|-------------------|---------------|---------------------|---------------------------------------|-------------------------------------|-------------------------------------------------------------------|-------------------------|
| <b>Total</b>      | 6230          | 2415                | 38.8 (37.6-40.0)                      | 36.9 (34.5-39.4)                    | 36.7 (34.3-39.2)                                                  |                         |
| <b>Age, years</b> |               |                     |                                       |                                     |                                                                   |                         |
| 18-29             | 1513          | 538                 | 35.6 (33.2-38.0)                      | 33.7 (30.1-37.6)                    | 33.5 (29.8-37.4)                                                  | 6.42,<br>0.0006         |
| 30-49             | 2672          | 1000                | 37.4 (35.6-39.3)                      | 36.3 (33.5-39.3)                    | 36.1 (33.3-39.1)                                                  |                         |
| 50-69             | 1643          | 691                 | 42.1 (39.7-44.5)                      | 42.5 (38.8-46.2)                    | 42.3 (38.6-46.0)                                                  |                         |
| ≥70               | 402           | 186                 | 46.3 (41.5-51.2)                      | 45.3 (37.8-53.0)                    | 45.1 (37.6-52.8)                                                  |                         |
| <b>Gender</b>     |               |                     |                                       |                                     |                                                                   |                         |
| Male              | 3126          | 1166                | 37.3 (35.6-39.0)                      | 36.1 (33.5-38.9)                    | 35.9 (33.3-38.7)                                                  | 0.94,<br>0.34           |
| Female            | 3104          | 1249                | 40.2 (38.5-42.0)                      | 37.8 (34.5-41.3)                    | 37.6 (34.3-41.1)                                                  |                         |
| <b>Residence</b>  |               |                     |                                       |                                     |                                                                   |                         |
| Urban             | 2866          | 1180                | 41.2 (39.4-43.0)                      | 40.2 (36.3-44.1)                    | 40.0 (36.1-43.9)                                                  | 3.43,<br>0.07           |
| Rural             | 3364          | 1235                | 36.7 (35.1-38.4)                      | 35.5 (32.5-38.7)                    | 35.3 (32.2-38.5)                                                  |                         |



|                                                      |      |      |                  |                  |                  |                |
|------------------------------------------------------|------|------|------------------|------------------|------------------|----------------|
| <b>Self-reported history of chronic disease</b>      |      |      |                  |                  |                  |                |
| Yes                                                  | 1145 | 495  | 43.2 (40.4-46.1) | 41.9 (37.4-46.6) | 41.7 (37.2-46.4) | 6.14, 0.02     |
| No                                                   | 5085 | 1920 | 37.8 (36.4-39.1) | 36.2 (33.7-38.9) | 36.0 (33.5-38.7) |                |
| <b>History of COVID-19 like symptoms</b>             |      |      |                  |                  |                  |                |
| Yes                                                  | 474  | 247  | 52.1 (47.6-56.6) | 47.4 (37.9-57.1) | 47.2 (37.7-56.9) | 5.53, 0.02     |
| No                                                   | 5756 | 2168 | 37.7 (36.4-38.9) | 36.3 (33.9-38.8) | 36.1 (33.7-38.6) |                |
| <b>History of contact with a known COVID-19 case</b> |      |      |                  |                  |                  |                |
| Yes                                                  | 439  | 219  | 49.9 (45.2-54.5) | 45.2 (38.3-52.2) | 45.0 (38.1-52.0) | 7.13, 0.01     |
| No                                                   | 5791 | 2196 | 37.9 (36.7-39.2) | 36.5 (34.1-39.0) | 36.3 (33.9-38.8) |                |
| <b>Ever tested for COVID-19 (RT-PCR)</b>             |      |      |                  |                  |                  |                |
| Yes                                                  | 1092 | 485  | 44.4 (41.5-47.4) | 41.0 (35.4-46.9) | 40.8 (35.2-46.7) | 2.17, 0.14     |
| No                                                   | 5138 | 1930 | 37.6 (36.2-38.9) | 36.2 (33.5-39.0) | 36.0 (33.3-38.8) |                |
| <b>RT-PCR result (n=1088*)</b>                       |      |      |                  |                  |                  |                |
| Positive                                             | 176  | 140  | 79.5 (73.0-84.9) | 81.8 (74.8-87.1) | 81.7 (74.7-87.1) | 74.93, <0.0001 |
| Negative                                             | 912  | 345  | 37.8 (34.7-41.0) | 38.8 (33.3-44.7) | 38.6 (33.1-44.5) |                |

COVID-19: Coronavirus disease; RT-PCR: Reverse transcriptase-polymerase chain reaction

\*RT-PCR result not known in four participants

**Table 3: Sensitivity analyses for seroprevalence at extremes of test performance**

|                   | Weighted seroprevalence, % (95% CI) | Weighted seroprevalence adjusted for test performance, % (95% CI) [Sensitivity 100.00%, Specificity 99.63%] | Weighted seroprevalence adjusted for test performance, % (95% CI) [Sensitivity 95.89%, Specificity 99.90%] | Weighted seroprevalence adjusted for test performance, % (95% CI) [Sensitivity 100.00%, Specificity 99.05%] |
|-------------------|-------------------------------------|-------------------------------------------------------------------------------------------------------------|------------------------------------------------------------------------------------------------------------|-------------------------------------------------------------------------------------------------------------|
| <b>Overall</b>    | 36.9 (34.5-39.4)                    | 36.7 (34.3-39.2)                                                                                            | 38.4 (35.9-41.0)                                                                                           | 36.3 (33.9-38.8)                                                                                            |
| <b>Age, years</b> |                                     |                                                                                                             |                                                                                                            |                                                                                                             |
| 18-29             | 33.7 (30.1-37.6)                    | 33.5 (29.8-37.4)                                                                                            | 35.1 (31.3-39.1)                                                                                           | 33.1 (29.4-37.0)                                                                                            |
| 30-49             | 36.3 (33.5-39.3)                    | 36.1 (33.3-39.1)                                                                                            | 37.8 (34.9-40.9)                                                                                           | 35.7 (32.9-38.7)                                                                                            |

|                                                      |                   |                  |                  |                  |
|------------------------------------------------------|-------------------|------------------|------------------|------------------|
| 50-69                                                | 42.5 (938.8-46.2) | 42.3 (38.6-46.0) | 44.3 (40.4-48.1) | 41.9 (38.2-45.7) |
| ≥70                                                  | 45.3 (937.8-53.0) | 45.1 (37.6-52.8) | 47.2 (39.4-55.2) | 44.8 (37.2-52.5) |
| <b>Gender</b>                                        |                   |                  |                  |                  |
| Male                                                 | 36.1 (33.5-38.9)  | 35.9 (33.3-38.7) | 37.6 (34.9-40.5) | 35.5 (32.9-38.3) |
| Female                                               | 37.8 (34.5-41.3)  | 37.6 (34.3-41.1) | 39.4 (35.9-43.0) | 37.2 (33.9-40.7) |
| <b>Residence</b>                                     |                   |                  |                  |                  |
| Urban                                                | 40.2 (36.3-44.1)  | 40.0 (36.1-43.9) | 41.9 (37.8-45.9) | 39.6 (35.7-43.6) |
| Rural                                                | 35.5 (32.5-38.7)  | 35.3 (32.2-38.5) | 37.0 (33.8-40.3) | 34.9 (31.9-38.1) |
| <b>Self-reported history of chronic disease</b>      |                   |                  |                  |                  |
| Yes                                                  | 43.2 (40.4-46.1)  | 41.9 (37.4-46.6) | 43.6 (38.9-48.5) | 41.3 (36.8-46.1) |
| No                                                   | 37.8 (36.4-39.1)  | 36.2 (33.7-38.9) | 37.7 (35.1-40.5) | 35.6 (33.1-38.3) |
| <b>History of COVID-19 like symptoms</b>             |                   |                  |                  |                  |
| Yes                                                  | 52.1 (47.6-56.6)  | 47.4 (37.9-57.1) | 49.4 (39.5-59.5) | 46.9 (37.3-56.7) |
| No                                                   | 37.7 (36.4-38.9)  | 36.3 (33.9-38.8) | 37.8 (35.3-40.4) | 35.7 (33.3-38.2) |
| <b>History of contact with a known COVID-19 case</b> |                   |                  |                  |                  |
| Yes                                                  | 49.9 (45.2-54.5)  | 45.2 (38.3-52.2) | 47.1 (39.9-54.4) | 44.7 (37.7-51.7) |
| No                                                   | 37.9 (36.7-39.2)  | 36.5 (34.1-39.0) | 38.0 (35.5-40.6) | 35.9 (33.5-38.4) |
| <b>Ever tested for COVID-19 (RT-PCR)</b>             |                   |                  |                  |                  |
| Yes                                                  | 44.4 (41.5-47.4)  | 41.0 (35.4-46.9) | 42.7 (36.9-48.9) | 40.4 (34.8-46.4) |
| No                                                   | 37.6 (36.2-38.9)  | 36.2 (33.5-39.0) | 37.7 (34.9-40.6) | 35.6 (32.9-38.4) |
| <b>RT-PCR result (n=1088*)</b>                       |                   |                  |                  |                  |
| Positive                                             | 79.5 (73.0-84.9)  | 81.8 (74.8-87.1) | 85.3 (78.0-90.8) | 81.6 (74.6-87.0) |
| Negative                                             | 37.8 (34.7-41.0)  | 38.8 (33.3-44.7) | 40.4 (34.7-46.6) | 38.2 (32.7-44.2) |

Seroprevalence was lowest among participants aged 18-29 years [33.5% (95% CI 29.8 – 37.4)] and was higher in older age groups. Seroprevalence was highest in those aged 70 years and above [45.1% (95% CI 37.6 – 52.8)]. Seroprevalence was not significantly different among males and females ( $p=0.34$ ). The seroprevalence among urban residents was 40.0% (95% CI 36.1 – 43.9), slightly but not significantly, higher than rural residents [35.3% (95% CI 32.2 – 38.5),  $p=0.07$ ]. (Table 2)

One in five participants (1145/6230, 18.4%) self-reported a history of at least one chronic disease (Table 1). Hypertension (815/6230, 13.1%) and diabetes mellitus (314/6230, 5.0%) were the most commonly reported chronic diseases (online supplemental file 2). Seroprevalence was significantly higher in participants who self-reported history of chronic disease (41.7%, 95% CI 37.2 – 46.4) as compared to those who did not report a history of chronic disease (36.0%, 95% CI 33.5 - 38.7) (Table 2).

Among participants who reported a history of COVID-19 like symptoms, seroprevalence was 47.2% (95% CI 37.7 – 56.9) compared with 36.1% (95% CI 33.7 – 38.6) among participants who did not report such

1  
2  
3 symptoms. Seroprevalence was higher among those who reported contact with a known COVID-19 case  
4 [45.0% (95% CI 38.1 – 52.0)] than participants who did not report any history of such contact [36.3%  
5 (95% CI 33.9 – 38.8)]. (Table 2)  
6

7 Seroprevalence was not significantly related to being tested for COVID-19 (RT-PCR). However, those who  
8 reported a positive RT-PCR COVID-19 test had significantly higher seroprevalence (81.7%, 95% CI 74.7 –  
9 87.1) as compared to those who reported a negative RT-PCR COVID-19 test (38.6%, 95% CI 33.1 – 44.5).  
10 (Table 2)  
11

12  
13 Among 2 415 seropositive individuals, only 247 (10.2%) reported a history of COVID-19 like symptoms.  
14 Only 20.1% (485/2415) of the seropositive individuals were tested for COVID-19 (RT-PCR). Among 474  
15 who reported a history of COVID-19 like symptoms, 233 (49.2%) were tested for COVID-19 (RT-PCR).  
16 Among 4897 individuals who did not report a history of COVID-19 like symptoms and were never tested  
17 for COVID-19 (RT-PCR), 1825 (37.3%) were seropositive. (Figure 3)  
18

19  
20 Among 36 participants who reported a positive RT-PCR COVID-19 test but were seronegative, the  
21 duration between COVID-19 RT-PCR test and serological testing ranged from 9 days to 101 days. In only  
22 four of these 36 participants, the duration between the COVID-19 RT-PCR test and the serological test  
23 was 14 days or less. Of the remaining 32 participants, 21 did not report a history of COVID-19 like  
24 symptoms, nine did not report a history of contact with a known COVID-19 case, and eight reported  
25 neither a history of COVID-19 like symptoms nor a history of contact with a known COVID-19 case.  
26

27 We estimated that there were 1 673 484 (95% CI 1 564 047 – 1 787 482) cumulative number of  
28 infections among adults aged  $\geq 18$  years in the valley by 03 Oct 2020, two weeks before the start of the  
29 survey. If we assume that the seroprevalence was similar to the overall seroprevalence in the population  
30 not included in our study ( $< 18$  years of age) then the estimated cumulative number of infections in the  
31 valley by 03 Oct 2020 was 2 791 933 (95% CI 2 609 354 – 2 982 119). Considering that the cumulative  
32 number of reported COVID-19 cases was 47 071 by 03 Oct 2020 (Figure 4), we estimate the number of  
33 infections per reported case as 59.3 (95% CI 55.4 – 63.4). The number of reported COVID-19 deaths after  
34 a three-week lag period (on 24 Oct 2020) was 955. Thus, we estimated the infection fatality rate as  
35 0.034% (95% CI 0.032 – 0.037).  
36  
37  
38

## 39 DISCUSSION

40  
41 The results of our study indicate that by the first week of October 2020, nearly seven months after the  
42 appearance of the first laboratory-confirmed COVID-19 case on 18 March 2020, close to 37% of the  
43 valley's population aged  $\geq 18$  years had been infected. Our results suggest that the cumulative number of  
44 SARS-CoV-2 infections by the first week of October 2020 was nearly 2.8 million with an estimated  
45 infection fatality rate of 0.034%. Seroprevalence did not differ by gender but was higher in older age  
46 groups.  
47

48  
49 The findings of our study are based on a representative sample of the population. The laboratory test  
50 used for the detection of SARS-CoV-2 specific IgG antibodies in serum samples provides valid  
51 results.[20,25] We report seroprevalence estimates adjusted for sampling design and test performance.  
52

53 The overall adjusted seroprevalence of around 37% indicates that a large proportion of the valley's  
54 population has been infected with the virus. Easing of lockdown, being fed up with the restrictions, and  
55 non-adherence to prevention norms are the possible reasons. Even though a large proportion of the  
56  
57

1  
2  
3 population has been infected, the transmission of infection is expected to continue till most of the  
4 susceptible population becomes immune. Herd immunity in the context of COVID-19 is a matter of  
5 debate as reports of a second infection continue to pour in.[26] The emergence of several Variants of  
6 Concern and the introduction of COVID-19 vaccination will also influence population immunity. Several  
7 factors potentially influence the seroprevalence rates. These include population density, social and  
8 demographic structure of the population, governmental policies and the extent of their implementation,  
9 immunity level of the population, time since the start of infection transmission, adherence to infection  
10 prevention guidelines, quality of contact tracing and quarantine, and possibly the geography and  
11 environment of an area.  
12  
13

14  
15 Comparison with previous reports suggests that the seroprevalence has increased almost ten-fold since  
16 July 2020.[16,27] The second of the three nationwide seroprevalence surveys in India conducted in  
17 August-September 2020 reports an overall seroprevalence of 6.6% ranging from 5.2% in rural areas to  
18 16.9% in urban slums.[28] A nationwide survey conducted in December 2020-January 2021 reported an  
19 overall seroprevalence of 24.1% ranging from 4.9% - 44.4% across districts.[29] Kashmir is thus not a  
20 low-infection area. Being an oft-visited tourist area, Kashmir is at an increased risk of infection  
21 transmission. Adherence to COVID appropriate behavior (use of face masks in public, frequent  
22 handwashing, physical and social distancing) has been poor. With the introduction of the COVID-19  
23 vaccination program in January 2021 and the emergence of a 'second wave' in Kashmir in April 2021, the  
24 seroprevalence estimates are expected to increase in the future.  
25  
26

27  
28 The seroprevalence of SARS-CoV-2 IgG antibodies was higher in older age groups. During the early  
29 period of the pandemic, people were adherent to social distancing and other non-pharmaceutical  
30 interventions because of a fear of the disease and administrative restrictions. With time, administrative  
31 restrictions were relaxed, fear of the disease attenuated, and people became sort of fed up with the  
32 social restrictions. This not only led to an increase in the number of reported COVID-19 cases but also  
33 provided the population, including older age groups, an opportunity to contract the infection. That older  
34 people have an increased risk of symptomatic and more severe disease is now well known.[30,31]  
35 However, age-based differential susceptibility to SARS-CoV-2 infection antibody response and the  
36 reasons thereof are still a grey area and need further understanding. Existing literature might suggest  
37 that the young who are more mobile and socially active have a higher risk of infection.[6,7] However,  
38 this should not imply that the elderly have a decreased susceptibility to SARS-CoV-2 infection or a  
39 decreased antibody response.[32] On the contrary, several studies suggest that the seroprevalence of  
40 SARS-CoV-2 specific IgG antibodies is higher in the older age groups and particularly so in more dense  
41 population groups.[4,5,8-11,13] Furthermore, SARS-CoV-2 antibody levels have been reported to be  
42 higher in older people.[12]  
43  
44  
45

46  
47 The seroprevalence of SARS-CoV-2 specific IgG antibodies did not differ significantly by gender, though  
48 the figure was slightly higher for females. These findings are consistent with the available  
49 literature.[6,13] Difference in seroprevalence by gender has been suggested by some studies and  
50 females have been reported to have lower antibody levels.[5,7,9,11,12,14,33]  
51

52  
53 Urban areas are more densely populated as compared to rural areas which accelerate the transmission  
54 of infections in the population. The seroprevalence of SARS-CoV-2 specific IgG antibodies is thus  
55 expected to be higher in urban areas especially during the early phases of an epidemic. As the epidemic  
56 progresses the seroprevalence gap between urban and rural areas will wane off. We estimated an  
57

1  
2  
3 adjusted seroprevalence of 40.0% (95% CI 36.1 – 43.9) in urban areas as compared to 35.3% (95% CI  
4 32.2 – 38.5) in rural areas ( $p=0.07$ ).

6 People with a chronic disease experience more severe COVID-19 symptoms and are more likely to die  
7 when compared to people with no chronic disease.[34] We found a higher proportion of symptomatic  
8 infection among participants with a self-reported history of chronic disease (78/1145, 6.8%) as  
9 compared to participants with no chronic disease (169/5085, 3.3%) (online supplemental file 3). Little is,  
10 however, known about the risk of infection in chronic disease patients. We found a significantly higher  
11 seroprevalence among participants with a self-reported history of chronic disease (Table 2). This finding  
12 needs further research for corroboration and possible explanations.

15 People with a self-reported history of COVID-19 related symptoms, contact with a known COVID-19  
16 case, or a positive COVID-19 RT-PCR had a higher seroprevalence as compared to their complement.  
17 Among seropositive individuals, only 10.2% reported being symptomatic. The percentage of  
18 asymptomatic infections, thus, was 90%. However, only 49% of individuals with a history of COVID-19  
19 like symptoms were tested using RT-PCR. We also estimated that only one out of almost 59 infections  
20 gets reported. This reflects the necessity of improving the efficiency of RT-PCR testing so that more  
21 symptomatic individuals receive the test. Not all individuals with a known RT-PCR positive result showed  
22 the presence of IgG antibodies. Around 20% of RT-PCR positive individuals were seronegative and in a  
23 large majority of them (32 out of 36) the duration since RT-PCR positivity was more than two weeks. This  
24 may be attributed to a poor B cell response or a false negative antibody test.[35] Around 38% of RT-PCR  
25 negative individuals were seropositive suggesting a false-negative RT-PCR or infection acquisition at a  
26 date later than the RT-PCR test.

30 We estimated an infection fatality rate of 0.034% (95% CI 0.032 – 0.037). The infection fatality rate in  
31 SARS-CoV-2 infection has been reported to range from as low as 0.00% to 1.63%.[36] Our estimates of  
32 the infection fatality rate are low as compared to estimates from several Indian studies.[5,28,37] Under-  
33 reporting of COVID-19 deaths because of non-uniform definition for a 'COVID-19 death' may falsely  
34 lower the infection fatality rates.[38] The infection fatality rate is, however, known to be lower in  
35 developing nations.[30,39] In developed nations like the United States and many European countries, a  
36 higher infection fatality rate has been reported.[30,40]

### 39 Limitations

41 One important limitation of our study is that even though we adjusted the weighted seroprevalence  
42 estimates for test performance using manufacturer-provided sensitivity and specificity (100% and  
43 99.63% respectively), we did not quantify the test validity in-house. Another limitation of our study  
44 estimates is that we excluded people <18 years of age. The results of our study may not thus be  
45 generalizable to this group of the population.

48 Our estimated seroprevalence was much higher than we anticipated at the designing stage. This has  
49 impacted the precision of our estimates to some extent. However, we believe we still have been able to  
50 estimate the seroprevalence with reasonable precision.

52 Lack of reliable death counts is another potential limitation. This may have led to an underestimation of  
53 the infection fatality rate. We did not perform any adjustment for death counts. Further, because of lack  
54

of age- and gender-specific mortality data we could not estimate age- and gender-specific infection fatality rates.

## CONCLUSIONS

We conclude that nearly 37% of individuals aged 18 years and above were infected with SARS-CoV-2 in Kashmir by October 2020. The infection fatality rate in the valley is around 0.034%. A majority of cases go unreported. For every reported case there are 59 unreported infections in the population. Since almost half of the symptomatic individuals go unreported, testing of symptomatic individuals and effective contact tracing needs to continue. Given the emergence of mutant Variants of Concern, increasing the population immunity through augmented and sustained vaccination is needed. We further recommend that adherence to COVID-19 prevention measures should be ensured at least till a large proportion of the population gets vaccinated.

## ACKNOWLEDGMENTS

We thank Prof. Samia Rashid for her support. We acknowledge the help from Divisional COVID-19 Control Room Kashmir, especially from Dr. Rauf Hussain Rather. We thank the following coordinating center teams and the laboratory support team for their support and coordination:

Coordinating center teams: Dr. Sabira Aalia Dkhar, Dr. Kouser Sideeq, Dr. Uruj Qureshi, Dr. Mehraj u Din Sofi, Dr. Yasmin Kango, Dr. Suhail Manzoor Shah, Dr. Bashir Ahmad Khan, Dr. Nabeel Ishtiyag, Dr. Tajamul Hussain Khan, Dr. Lahoot Hassan Khan, Dr. Muzaffer Ahmad, Dr. Ramesh Kumar Malla, Dr. Ruqaya Rasool Kapta, Dr. Mohammad Yousuf Naikoo, Dr. Khalid Abbass, Dr. Zarar Ahmad Bhat, Dr. Sumair Rashid, Dr. Zubair Ahmad, Dr. Shalender Singh Bali, Dr. Abdul Rouf, Dr. Abdul Hamid, Dr. Khalid Bashir, Dr. Qazi Najeem Ahmad, Dr. Syed Irtiza, Dr. P Sharik Shaheen Khaki, Dr. Sheikh Mohammad Shafi, Dr. Mohammad Yousuf Zagoo, Dr. Mukhtar Ahmad Shah, Dr. Imtiyaz-ur-Rehman Bhat, Dr. Showkat Parray, Dr. Fazil Ali Kochak, Dr. Muzaffar Ahmad Zargar, Dr. Abdul Rashid Shah, Dr. Shagufta Saleem, Dr. Abdul Gani, Dr. Nighat Nasreen, Dr. Asima Nazeer, Dr. Zahoor Ahmad Lone.

Laboratory support team: Ishtiyag Ahmad Handoo, Rahiba Makhdoomi, Iyman Wani, Romana Rasool, Asiya Rehman, Insha Rehman, Zahoor Ahmad, Gulzar Ahmad Wani, Javid Ahmad Bhat, M Saleem Malik, Naveed Manzoor, Mubeena.

## COMPETING INTERESTS

We declare no competing interests, financial or otherwise.

## FUNDING

The National Health Mission Jammu & Kashmir funded the study. The funding agency was not involved in study designing, implementation, analysis, or interpretation of the study findings.

## CONTRIBUTORS

S Muhammad Salim Khan: Conceptualization, Funding acquisition, Methodology, Writing-review & editing.

Mariya Amin Qurieshi, Inaamul Haq, Sabhiya Majid: Formal analysis, Data curation, Methodology, Project administration, Writing-original draft, Writing-review & editing.

1  
2  
3 Javid Ahmad, Taha Ayub, Anjum Bashir, Ashfaq Ahmad Bhat, Abdul Majeed Ganai, Yasmeen Jan, Rauf-  
4 ur-Rashid Kaul, Zahid Ali Khan, Muneer Ahmad Masoodi, Beenish Mushtaq, Fouzia Nazir, Muzamil Nazir,  
5 Malik Waseem Raja, Mahbooba Rasool: Project administration, Supervision, Investigation, Writing-  
6 review & editing.

7  
8 Anjum Asma, Munazza Aziz, Shifana Ayoub, Arif Akbar Bhat, Iqra Nisar Chowdri, Shaista Ismail, Misbah  
9 Ferooz Kawoosa, Mehvish Afzal Khan, Mosin Saleem Khan, Rafiya Kousar, Ab Aziz Lone, Shahroz Nabi,  
10 Mohammad Obaid, Tanzeela Bashir Qazi, Iram Sabah, Ishtiyahq Ahmad Sumji: Supervision, Investigation,  
11 Writing-review & editing.

12  
13  
14 S Muhammad Salim Khan, Mariya Amin Qurieshi, Inaamul Haq, and Sabhiya Majid have verified the  
15 underlying data.

#### 16 17 **DATA SHARING**

18  
19 Anonymized data collected for the study, including individual participant data and a data dictionary  
20 defining each field in the set, will be made available to interested researchers on request by Inaamul  
21 Haq ([haqinaam@yahoo.co.in](mailto:haqinaam@yahoo.co.in)) for two years from publication. The study protocol, statistical analysis  
22 plan, and informed consent forms are also available from Inaamul Haq.  
23  
24  
25  
26  
27  
28  
29  
30  
31  
32  
33  
34  
35  
36  
37  
38  
39  
40  
41  
42  
43  
44  
45  
46  
47  
48  
49  
50  
51  
52  
53  
54  
55  
56  
57

## REFERENCES

- 1 Timeline of WHO's response to COVID-19. <https://www.who.int/emergencies/diseases/novel-coronavirus-2019/interactive-timeline#!> (accessed 26 Mar 2021).
- 2 Saleem S, Quansar R, Qurieshi M. COVID-19: Preparedness and response by union territory of Jammu and Kashmir for containment of pandemic. *Curr Med Issues* 2020;**18**:206. doi:10.4103/cmi.cmi\_56\_20
- 3 Peirlinck M, Linka K, Sahli Costabal F, *et al.* Visualizing the invisible: The effect of asymptomatic transmission on the outbreak dynamics of COVID-19. *Comput Methods Appl Mech Eng* 2020;**372**. doi:10.1016/j.cma.2020.113410
- 4 Borges LP, Martins AF, de Melo MS, *et al.* Seroprevalence of SARS-CoV-2 IgM and IgG antibodies in an asymptomatic population in Sergipe, Brazil. *Rev Panam Salud Publica/Pan Am J Public Heal* 2020;**44**:e108. doi:10.26633/RPSP.2020.108
- 5 Malani A, Shah D, Kang G, *et al.* Seroprevalence of SARS-CoV-2 in slums versus non-slums in Mumbai, India. *Lancet Glob. Heal.* 2021;**9**:e110–1. doi:10.1016/S2214-109X(20)30467-8
- 6 Capai L, Ayhan N, Masse S, *et al.* Seroprevalence of SARS-CoV-2 IgG Antibodies in Corsica (France), April and June 2020. *J Clin Med* 2020;**9**:3569. doi:10.3390/jcm9113569
- 7 Mahajan S, Srinivasan R, Redlich CA, *et al.* Seroprevalence of SARS-CoV-2-Specific IgG Antibodies Among Adults Living in Connecticut: Post-Infection Prevalence (PIP) Study. *Am J Med* 2021;**134**:526-534.e11. doi:10.1016/j.amjmed.2020.09.024
- 8 Goldstein E, Lipsitch M, Cevik M. On the Effect of Age on the Transmission of SARS-CoV-2 in Households, Schools, and the Community. *J Infect Dis* 2021;**223**:362–9. doi:10.1093/infdis/jiaa691
- 9 Pan Y, Li X, Yang G, *et al.* Seroprevalence of SARS-CoV-2 immunoglobulin antibodies in Wuhan, China: part of the city-wide massive testing campaign. *Clin Microbiol Infect* 2021;**27**:253–7. doi:10.1016/j.cmi.2020.09.044
- 10 Pagani G, Conti F, Giacomelli A, *et al.* Seroprevalence of SARS-CoV-2 significantly varies with age: Preliminary results from a mass population screening. *J. Infect.* 2020;**81**:e10–2. doi:10.1016/j.jinf.2020.09.021
- 11 Vena A, Berruti M, Adessi A, *et al.* Prevalence of Antibodies to SARS-CoV-2 in Italian Adults and Associated Risk Factors. *J Clin Med* 2020;**9**:2780. doi:10.3390/jcm9092780
- 12 Gudbjartsson DF, Norddahl GL, Melsted P, *et al.* Humoral Immune Response to SARS-CoV-2 in Iceland. *N Engl J Med* 2020;**383**:1724–34. doi:10.1056/nejmoa2026116
- 13 Pollán M, Pérez-Gómez B, Pastor-Barriuso R, *et al.* Prevalence of SARS-CoV-2 in Spain (ENE-COVID): a nationwide, population-based seroepidemiological study. *Lancet* 2020;**396**:535–44. doi:10.1016/S0140-6736(20)31483-5
- 14 Stringhini S, Wisniak A, Piumatti G, *et al.* Seroprevalence of anti-SARS-CoV-2 IgG antibodies in Geneva, Switzerland (SEROCoV-POP): a population-based study. *Lancet* 2020;**396**:313–9. doi:10.1016/S0140-6736(20)31304-0
- 15 Clapham H, Hay J, Routledge I, *et al.* Seroepidemiologic study designs for determining SARS-COV-

14



- 1  
2  
3 2 transmission and immunity. *Emerg. Infect. Dis.* 2020;**26**:1978–86. doi:10.3201/eid2609.201840  
4  
5 16 Khan SMS, Qurieshi MA, Haq I, *et al.* Seroprevalence of SARS-CoV-2 specific IgG antibodies in  
6 District Srinagar, northern India – A cross-sectional study. *PLoS One* 2020;**15**:e0239303.  
7 doi:10.1371/journal.pone.0239303  
8  
9 17 OpenEpi - Toolkit Shell for Developing New Applications.  
10 <http://www.openepi.com/SampleSize/SSPropor.htm> (accessed 5 Jul 2021).  
11  
12 18 Census of India Website : Office of the Registrar General & Census Commissioner, India.  
13 <https://www.censusindia.gov.in/> (accessed 26 Mar 2021).  
14  
15 19 Epicollect5 - Free and easy-to-use mobile data-gathering platform. <https://five.epicollect.net/>  
16 (accessed 26 Mar 2021).  
17  
18 20 SARS-CoV-2 Immunoassay | Abbott Core Laboratory.  
19 <https://www.corelaboratory.abbott/us/en/offerings/segments/infectious-disease/sars-cov-2>  
20 (accessed 26 Mar 2021).  
21  
22 21 Brown LD, Cai TT, Das Gupta A. Interval estimation for a binomial proportion. *Stat Sci*  
23 2001;**16**:101–17. doi:10.1214/ss/1009213286  
24  
25 22 Census of India Website : Office of the Registrar General & Census Commissioner, India.  
26 [https://censusindia.gov.in/vital\\_statistics/SRS\\_Bulletins/Bulletins.html](https://censusindia.gov.in/vital_statistics/SRS_Bulletins/Bulletins.html) (accessed 26 Mar 2021).  
27  
28 23 Sempos CT, Tian L. Adjusting Coronavirus Prevalence Estimates for Laboratory Test Kit Error. *Am J*  
29 *Epidemiol* 2021;**190**:109–15. doi:10.1093/aje/kwaa174  
30  
31 24 Bendavid E, Mulaney B, Sood N, *et al.* COVID-19 antibody seroprevalence in Santa Clara County,  
32 California. *Int J Epidemiol* 2021;**50**:410–9. doi:10.1093/ije/dyab010  
33  
34 25 Bryan A, Pepper G, Wener MH, *et al.* Performance characteristics of the abbott architect sars-  
35 cov-2 igg assay and seroprevalence in Boise, Idaho. *J Clin Microbiol* 2020;**58**:e00941-20.  
36 doi:10.1128/JCM.00941-20  
37  
38 26 Elzein F, Ibrahim A, Alshahrani F, *et al.* Reinfection, recurrence, or delayed presentation of  
39 COVID-19? Case series and review of the literature. *J Infect Public Health* 2021;**14**:474–7.  
40 doi:10.1016/j.jiph.2021.01.002  
41  
42 27 Khan MS, Haq I, Qurieshi MA, *et al.* SARS-CoV-2 Seroprevalence Among Healthcare Workers by  
43 Workplace Exposure Risk in Kashmir, India. *J Hosp Med* 2021;**16**:274–81. doi:10.12788/jhm.3609  
44  
45 28 Murhekar M V., Bhatnagar T, Selvaraju S, *et al.* SARS-CoV-2 antibody seroprevalence in India,  
46 August–September, 2020: findings from the second nationwide household serosurvey. *Lancet*  
47 *Glob Heal* 2021;**9**:e257–66. doi:10.1016/S2214-109X(20)30544-1  
48  
49 29 Murhekar M V., Bhatnagar T, Thangaraj JWV, *et al.* SARS-CoV-2 seroprevalence among the  
50 general population and healthcare workers in India, December 2020–January 2021. *Int J Infect*  
51 *Dis* 2021;**108**:145–55. doi:10.1016/j.ijid.2021.05.040  
52  
53 30 O’Driscoll M, Ribeiro Dos Santos G, Wang L, *et al.* Age-specific mortality and immunity patterns of  
54 SARS-CoV-2. *Nature* 2021;**590**:140–5. doi:10.1038/s41586-020-2918-0  
55  
56 31 Kadambari S, Klenerman P, Pollard AJ. Why the elderly appear to be more severely affected by  
57  
58 15  
59  
60

- 1  
2  
3 COVID-19: The potential role of immunosenescence and CMV. *Rev. Med. Virol.* 2020;**30**:e2144.  
4 doi:10.1002/rmv.2144  
5
- 6 32 Pawelec G, Weng NP. Can an effective sars-cov-2 vaccine be developed for the older population?  
7 *Immun. Ageing.* 2020;**17**. doi:10.1186/s12979-020-00180-2  
8
- 9 33 Naranbhai V, Chang CC, Beltran WFG, *et al.* High seroprevalence of anti-SARS-CoV-2 antibodies in  
10 Chelsea, Massachusetts. *J Infect Dis* 2020;**222**:1955–9. doi:10.1093/infdis/jiaa579  
11
- 12 34 Yang J, Zheng Y, Gou X, *et al.* Prevalence of comorbidities and its effects in coronavirus disease  
13 2019 patients: A systematic review and meta-analysis. *Int J Infect Dis* 2020;**94**:91–5.  
14 doi:10.1016/j.ijid.2020.03.017  
15
- 16 35 Vabret N. Antibody responses to SARS-CoV-2 short-lived. *Nat Rev Immunol* 2020;**20**:519.  
17 doi:10.1038/s41577-020-0405-3  
18
- 19 36 Ioannidis JPA. Infection fatality rate of COVID-19 inferred from seroprevalence data. *Bull World*  
20 *Health Organ* 2021;**99**:19-33F. doi:10.2471/BLT.20.265892  
21
- 22 37 Murhekar M V., Bhatnagar T, Selvaraju S, *et al.* Prevalence of SARS-CoV-2 infection in India:  
23 Findings from the national serosurvey, May-June 2020. *Indian J Med Res* 2020;**152**:48–60.  
24 doi:10.4103/ijmr.IJMR\_3290\_20  
25
- 26 38 Pulla P. What counts as a covid-19 death? *BMJ* 2020;**370**:m2859. doi:10.1136/bmj.m2859  
27
- 28 39 Gu X, Mukherjee B, Das S, *et al.* COVID-19 prediction in South Africa: Understanding the  
29 unascertained cases - The hidden part of the epidemiological iceberg. medRxiv. 2020.  
30 doi:10.1101/2020.12.10.20247361  
31
- 32 40 McCulloh I, Kiernan K, Kent T. Inferring True COVID19 Infection Rates From Deaths. *Front Big*  
33 *Data* 2020;**3**. doi:10.3389/fdata.2020.565589  
34  
35  
36  
37

### Figure 1 legend:

38  
39  
40 Figure 1: Location of the ten districts and seroprevalence (%) by district. Figures in parentheses indicate  
41 a 95% Confidence Interval for seroprevalence.  
42

### Figure 2 legend:

43  
44  
45 Figure 2: Participant flow.  
46

### Figure 3 legend:

47  
48  
49 Figure 3: A. Seropositivity by the history of COVID-19 like symptoms, RT-PCR testing, and test result. B.  
50 History of COVID-19 like symptoms by seropositivity, RT-PCR testing, and test result.  
51

### Figure 4 legend:

52  
53  
54 Figure 4: A. Daily cases and deaths in Kashmir since the start of the COVID-19 pandemic; B. Cumulative  
55 number of cases and deaths in Kashmir.  
56  
57

1  
2  
3  
4  
5  
6  
7  
8  
9  
10  
11  
12  
13  
14  
15  
16  
17  
18  
19  
20  
21  
22  
23  
24  
25  
26  
27  
28  
29  
30  
31  
32  
33  
34  
35  
36  
37  
38  
39  
40

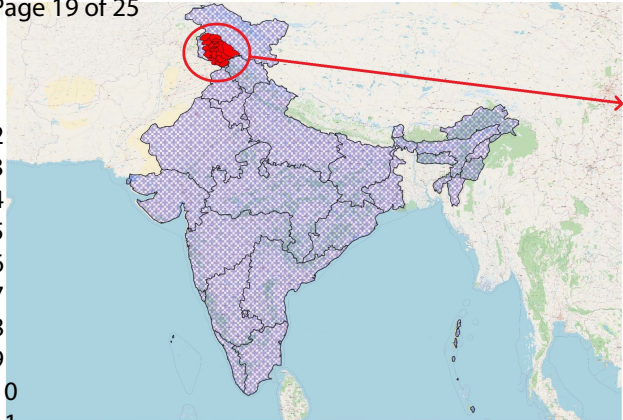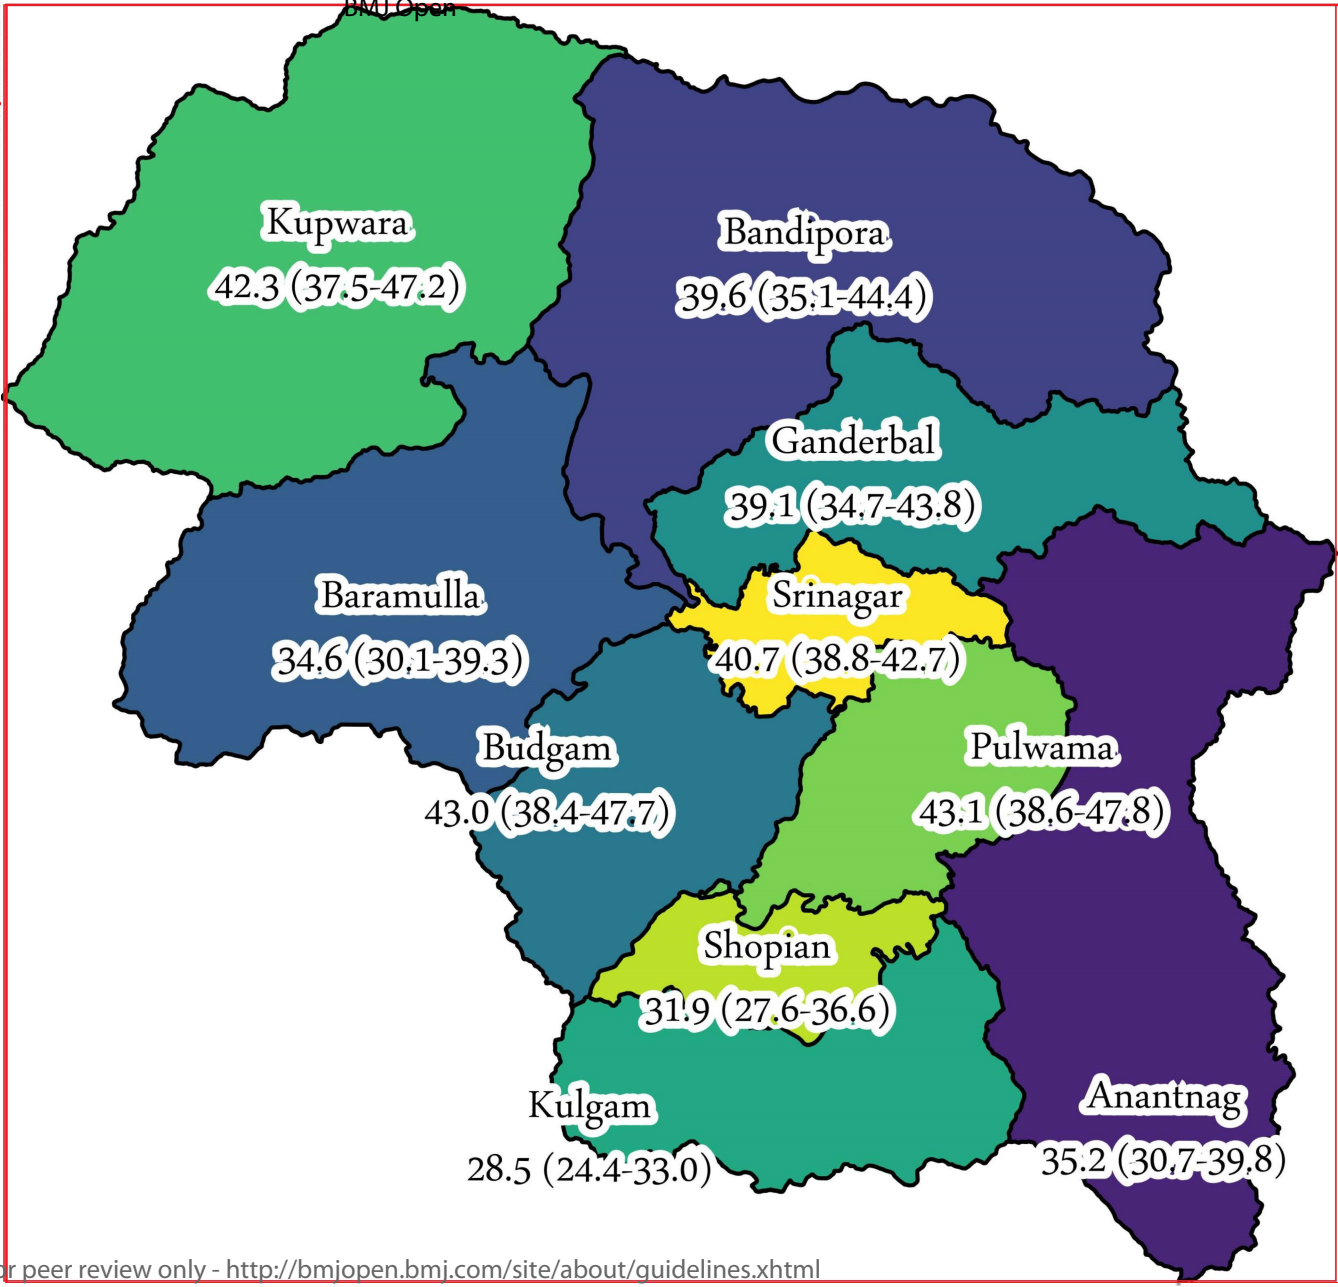

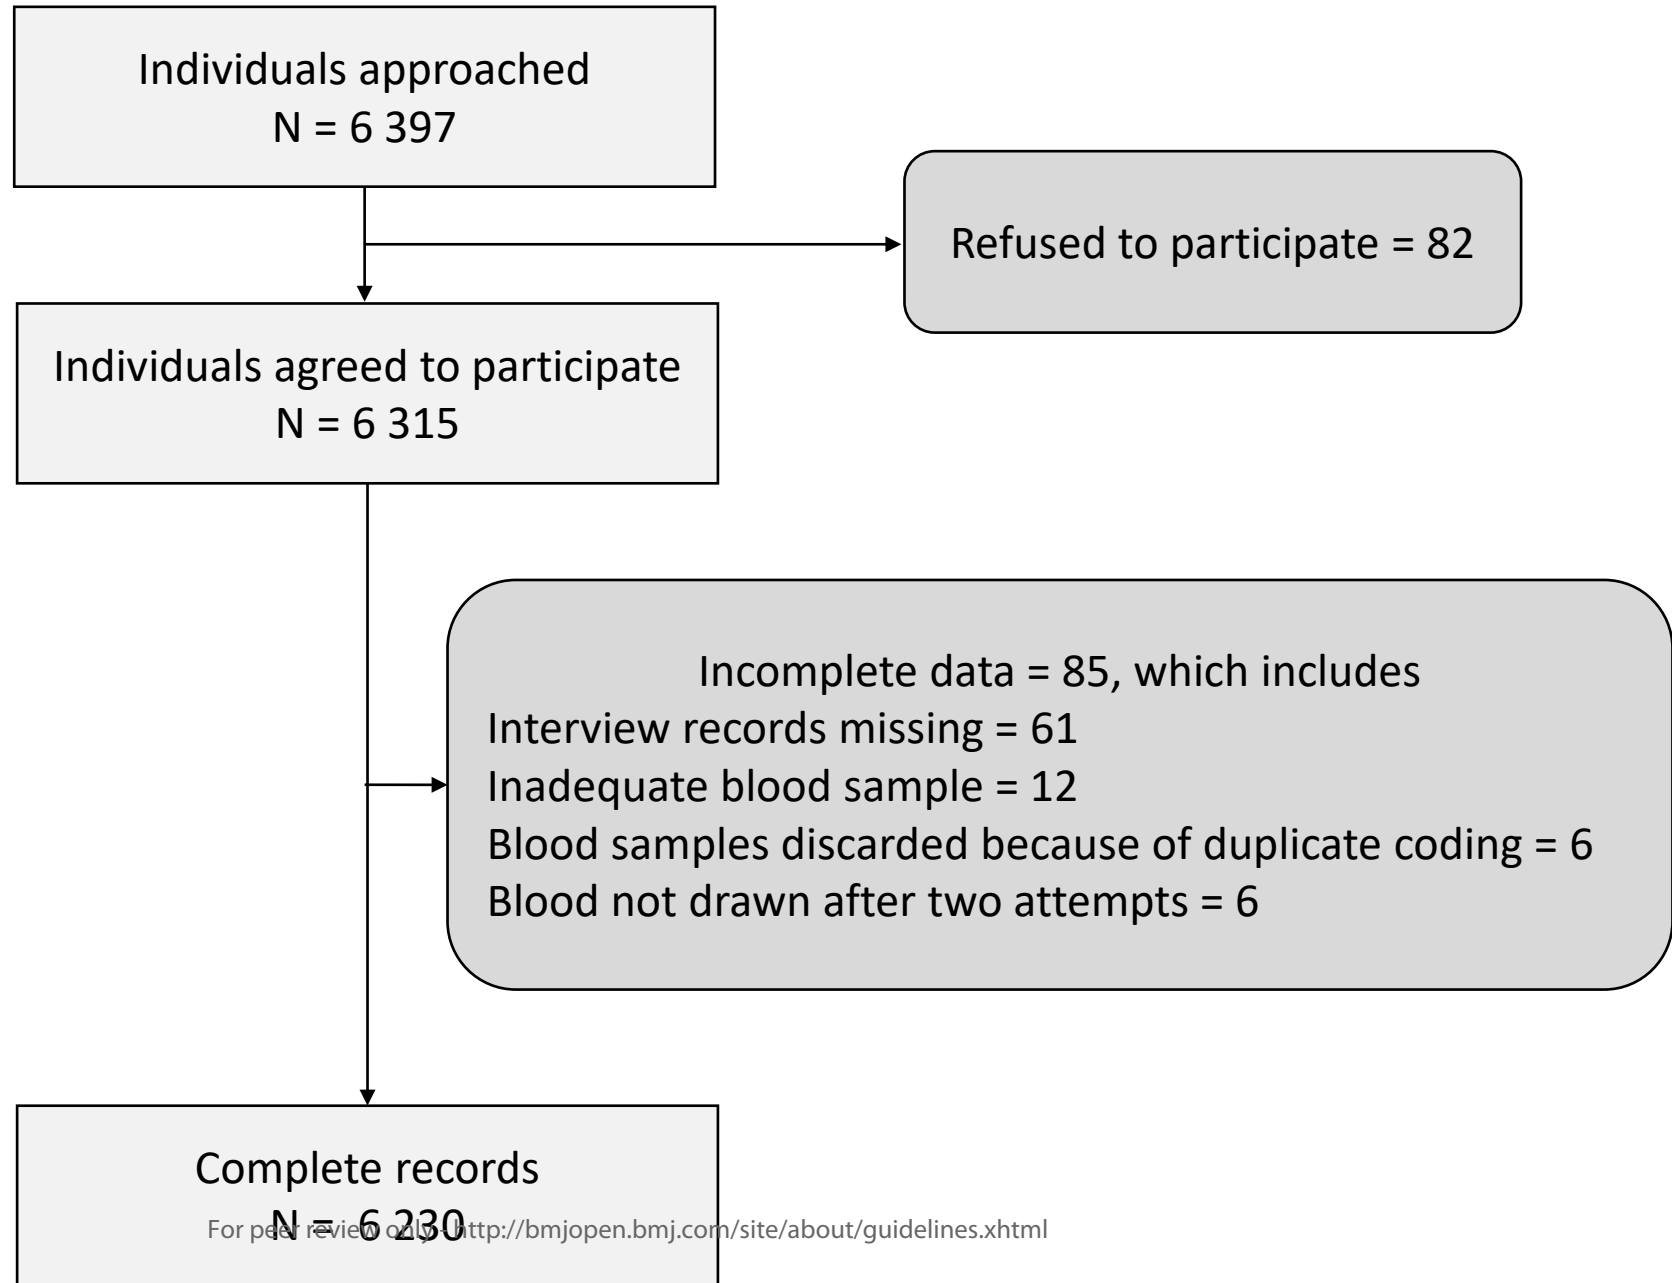

1  
2  
3  
4  
5  
6  
7  
8  
9  
10  
11  
12  
13  
14  
15  
16  
17  
18  
19  
20  
21  
22  
23  
24  
25  
26  
27  
28  
29  
30  
31  
32  
33  
34  
35  
36  
37  
38  
39  
40  
41

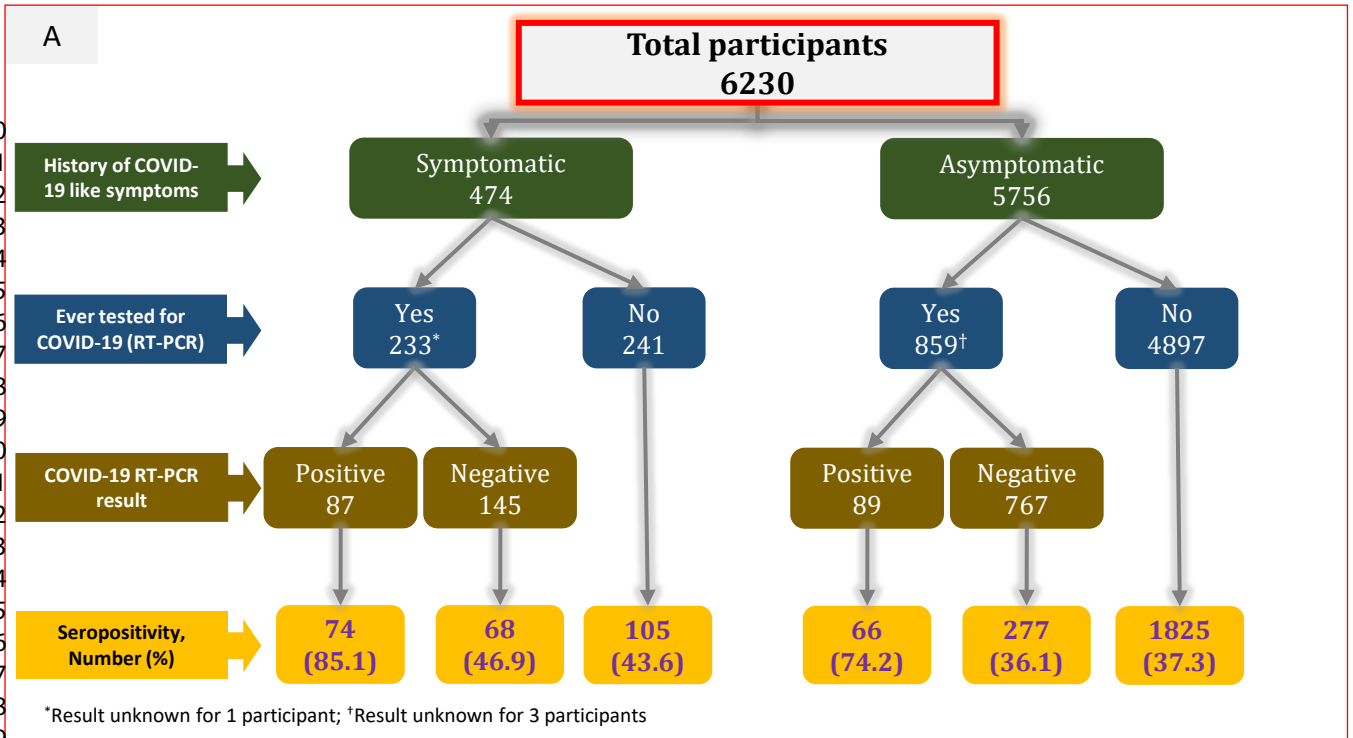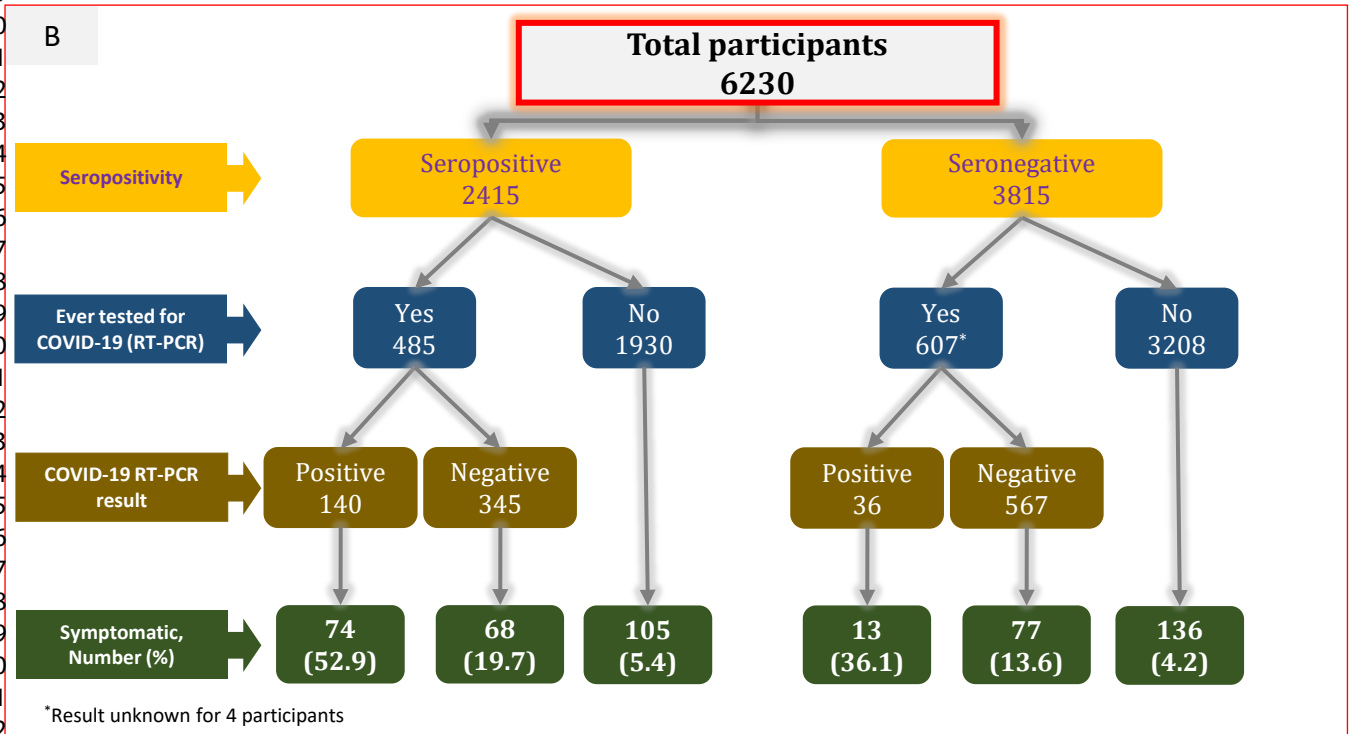

### BMJ Open

A

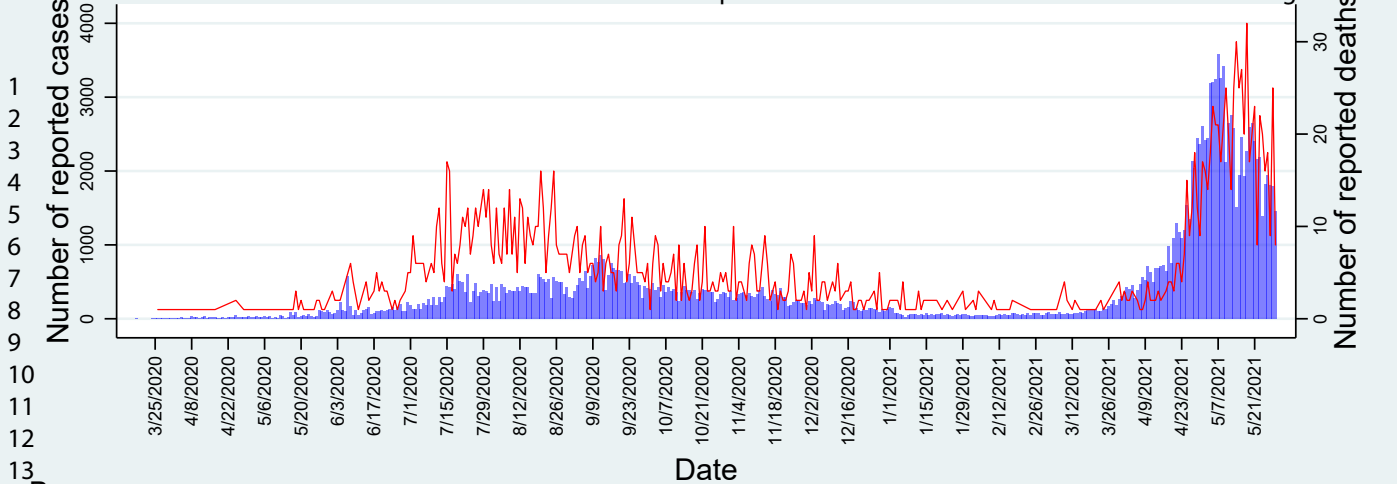

B

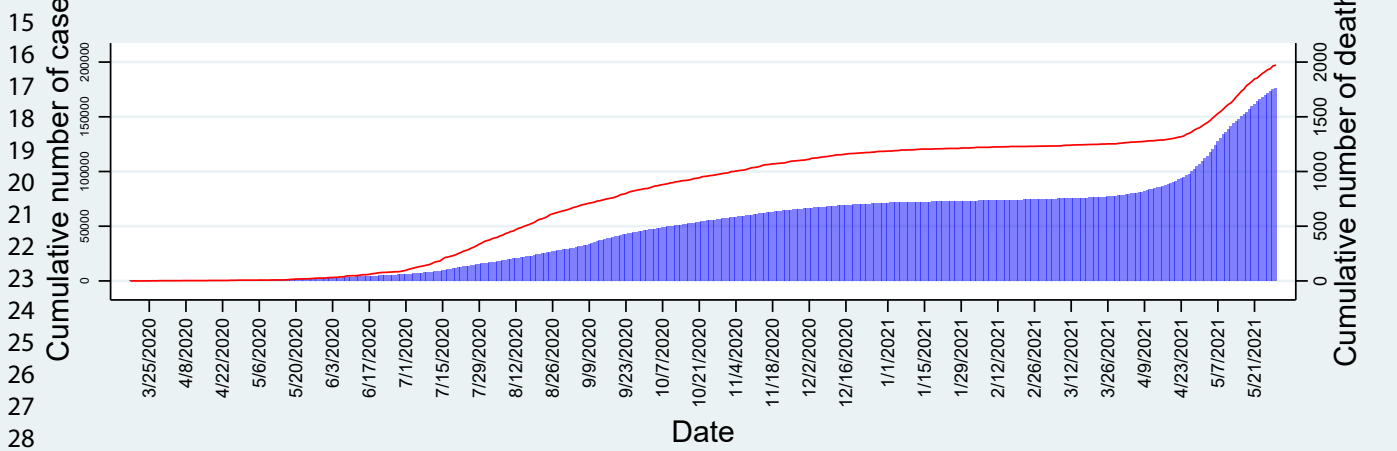

For peer review only - <http://open.bmj.com/site/defining/cases.html>

32

Supplemental Table 1: Participant characteristics by district

| District  | Total | Age (years) |       |       |     | Gender |      | Residence |       |
|-----------|-------|-------------|-------|-------|-----|--------|------|-----------|-------|
|           |       | <30         | 30-49 | 50-69 | 70+ | Female | Male | Rural     | Urban |
| Anantnag  | 421   | 84          | 197   | 113   | 27  | 214    | 207  | 295       | 126   |
| Budgam    | 442   | 113         | 190   | 105   | 34  | 263    | 179  | 354       | 88    |
| Bandipora | 424   | 106         | 174   | 114   | 30  | 227    | 197  | 341       | 83    |
| Baramulla | 405   | 113         | 176   | 98    | 18  | 214    | 191  | 325       | 80    |
| Ganderbal | 442   | 92          | 210   | 123   | 17  | 233    | 209  | 346       | 96    |
| Kulgam    | 428   | 102         | 194   | 113   | 19  | 257    | 171  | 346       | 82    |
| Kupwara   | 400   | 81          | 171   | 105   | 43  | 215    | 185  | 360       | 40    |
| Pulwama   | 443   | 102         | 176   | 126   | 39  | 218    | 225  | 396       | 47    |
| Shopiyan  | 407   | 119         | 152   | 90    | 46  | 211    | 196  | 368       | 39    |
| Srinagar  | 2418  | 601         | 1032  | 656   | 129 | 1052   | 1366 | 233       | 2185  |
| Total     | 6230  | 1513        | 2672  | 1643  | 402 | 3104   | 3126 | 3364      | 2866  |

Supplemental Table 2: Seroprevalence (unadjusted) by district and participant characteristics

| District  | Overall          | Age (years)      |                  |                  |                  | Gender           |                  | Residence        |                  |
|-----------|------------------|------------------|------------------|------------------|------------------|------------------|------------------|------------------|------------------|
|           |                  | <30              | 30-49            | 50-69            | 70+              | Male             | Female           | Urban            | Rural            |
| Anantnag  | 35.2 (30.7-39.8) | 29.8 (21-40.4)   | 34.5 (28.2-41.4) | 38.9 (30.4-48.2) | 40.7 (24.2-59.7) | 36.2 (30-43)     | 34.1 (28.1-40.7) | 42.9 (34.5-51.6) | 31.9 (26.8-37.4) |
| Budgam    | 43 (38.4-47.7)   | 44.2 (35.4-53.5) | 37.9 (31.3-45)   | 48.6 (39.2-58.1) | 50 (33.8-66.2)   | 41.9 (34.9-49.3) | 43.7 (37.8-49.8) | 38.6 (29.1-49.2) | 44.1 (39-49.3)   |
| Bandipora | 39.6 (35.1-44.4) | 37.7 (29-47.3)   | 42 (34.8-49.4)   | 40.4 (31.8-49.6) | 30 (16.4-48.3)   | 37.6 (31.1-44.5) | 41.4 (35.2-47.9) | 55.4 (44.6-65.7) | 35.8 (30.9-41)   |
| Baramulla | 34.6 (30.1-39.3) | 27.4 (20-36.4)   | 32.4 (25.9-39.6) | 44.9 (35.4-54.8) | 44.4 (24-67)     | 39.3 (32.6-46.4) | 30.4 (24.6-36.9) | 36.3 (26.5-47.3) | 34.2 (29.2-39.5) |
| Ganderbal | 39.1 (34.7-43.8) | 34.8 (25.8-45)   | 40.5 (34-47.3)   | 39.8 (31.6-48.7) | 41.2 (21-64.8)   | 39.2 (32.8-46)   | 39.1 (33-45.5)   | 42.7 (33.2-52.8) | 38.2 (33.2-43.4) |
| Kulgam    | 28.5 (24.4-33)   | 27.5 (19.7-36.9) | 26.8 (21-33.5)   | 31 (23.1-40.1)   | 36.8 (18.7-59.7) | 25.1 (19.2-32.2) | 30.7 (25.4-36.6) | 37.8 (28-48.7)   | 26.3 (21.9-31.2) |
| Kupwara   | 42.3 (37.5-47.2) | 33.3 (24-44.2)   | 39.8 (32.7-47.3) | 50.5 (41-59.9)   | 48.8 (34.4-63.4) | 41.6 (34.7-48.9) | 42.8 (36.3-49.5) | 50 (35-65)       | 41.4 (36.4-46.6) |
| Pulwama   | 43.1 (38.6-47.8) | 35.3 (26.7-45)   | 42.6 (35.5-50)   | 45.2 (36.8-54)   | 59 (43.2-73.1)   | 39.6 (33.4-46.1) | 46.8 (40.3-53.4) | 40.4 (27.5-54.9) | 43.4 (38.6-48.4) |
| Shopiyan  | 31.9 (27.6-36.6) | 28.6 (21.2-37.3) | 29.6 (22.9-37.3) | 41.1 (31.4-51.5) | 30.4 (18.9-45.1) | 31.1 (25-37.9)   | 32.7 (26.7-39.3) | 38.5 (24.7-54.4) | 31.3 (26.7-36.2) |
| Srinagar  | 40.7 (38.8-42.7) | 39.1 (35.3-43.1) | 39.2 (36.3-42.3) | 41.9 (38.2-45.7) | 53.5 (44.9-61.9) | 37.7 (35.2-40.3) | 44.6 (41.6-47.6) | 40.8 (38.7-42.9) | 39.9 (33.8-46.3) |

### Chronic disease and SARS-CoV-2 infection in the study population

Of the 6230 participants, 1145 reported a history of at least one chronic disease. Two hundred ninety-eight reported a history of more than one chronic disease.

#### Supplementary Table 3: Chronic disease in the study population

| Chronic disease (n = 1145)            | Number (%)  |
|---------------------------------------|-------------|
| Hypertension                          | 815 (13.1%) |
| Diabetes                              | 314 (5.0%)  |
| Chronic Obstructive Pulmonary Disease | 39 (0.6%)   |
| Coronary Heart Disease                | 35 (0.6%)   |
| Cerebrovascular Disease               | 16 (0.3%)   |
| Asthma                                | 15 (0.2%)   |
| Chronic Kidney Disease                | 10 (0.2%)   |
| Chronic Liver Disease                 | 5 (0.1%)    |
| Cancer                                | 4 (0.1%)    |



**Supplementary Table 4: History of COVID-19 like symptoms and seropositivity vis-à-vis history of chronic disease**

|                                                        |              | History of COVID-19 like symptoms |      |
|--------------------------------------------------------|--------------|-----------------------------------|------|
|                                                        |              | Yes                               | No   |
| Reported history of chronic disease (n=1145)           | Seropositive | 78                                | 417  |
|                                                        | Seronegative | 63                                | 587  |
| Did not report any history of chronic disease (n=5085) | Seropositive | 169                               | 1751 |
|                                                        | Seronegative | 164                               | 3001 |

Of the 1154 participants who reported a history of chronic disease 78 (6.8%) reported a history of COVID-19 like symptoms within three months of the interview date and were seropositive for SARS-CoV-2 specific IgG (symptomatic infection). The proportion of symptomatic infection among participants who did not report any history of chronic disease was 3.3% (169/5085).

STROBE Statement—Checklist of items that should be included in reports of *cross-sectional studies*

|                              | Item No | Recommendation                                                                                                                                                                                    | Page No              |
|------------------------------|---------|---------------------------------------------------------------------------------------------------------------------------------------------------------------------------------------------------|----------------------|
| <b>Title and abstract</b>    | 1       | (a) Indicate the study's design with a commonly used term in the title or the abstract                                                                                                            | 1, 3                 |
|                              |         | (b) Provide in the abstract an informative and balanced summary of what was done and what was found                                                                                               | 2                    |
| <b>Introduction</b>          |         |                                                                                                                                                                                                   |                      |
| Background/rationale         | 2       | Explain the scientific background and rationale for the investigation being reported                                                                                                              | 3                    |
| Objectives                   | 3       | State specific objectives, including any prespecified hypotheses                                                                                                                                  | 3                    |
| <b>Methods</b>               |         |                                                                                                                                                                                                   |                      |
| Study design                 | 4       | Present key elements of study design early in the paper                                                                                                                                           | 3                    |
| Setting                      | 5       | Describe the setting, locations, and relevant dates, including periods of recruitment, exposure, follow-up, and data collection                                                                   | 3 and Figure 1       |
| Participants                 | 6       | (a) Give the eligibility criteria, and the sources and methods of selection of participants                                                                                                       | 3, 4                 |
| Variables                    | 7       | Clearly define all outcomes, exposures, predictors, potential confounders, and effect modifiers. Give diagnostic criteria, if applicable                                                          | 4                    |
| Data sources/<br>measurement | 8*      | For each variable of interest, give sources of data and details of methods of assessment (measurement). Describe comparability of assessment methods if there is more than one group              | 4                    |
| Bias                         | 9       | Describe any efforts to address potential sources of bias                                                                                                                                         | 4, 5                 |
| Study size                   | 10      | Explain how the study size was arrived at                                                                                                                                                         | 3                    |
| Quantitative variables       | 11      | Explain how quantitative variables were handled in the analyses. If applicable, describe which groupings were chosen and why                                                                      | 4                    |
| Statistical methods          | 12      | (a) Describe all statistical methods, including those used to control for confounding                                                                                                             | 4, 5                 |
|                              |         | (b) Describe any methods used to examine subgroups and interactions                                                                                                                               | 5                    |
|                              |         | (c) Explain how missing data were addressed                                                                                                                                                       | 5                    |
|                              |         | (d) If applicable, describe analytical methods taking account of sampling strategy                                                                                                                | 4, 5                 |
|                              |         | (e) Describe any sensitivity analyses                                                                                                                                                             | 6, Table 3           |
| <b>Results</b>               |         |                                                                                                                                                                                                   |                      |
| Participants                 | 13*     | (a) Report numbers of individuals at each stage of study—eg numbers potentially eligible, examined for eligibility, confirmed eligible, included in the study, completing follow-up, and analysed | Figure 2, and page 5 |
|                              |         | (b) Give reasons for non-participation at each stage                                                                                                                                              | Figure 2             |
|                              |         | (c) Consider use of a flow diagram                                                                                                                                                                | Figure 2             |
| Descriptive data             | 14*     | (a) Give characteristics of study participants (eg demographic, clinical, social) and information on exposures and potential confounders                                                          | Table 1              |
|                              |         | (b) Indicate number of participants with missing data for each variable of interest                                                                                                               | Table 1, Figure 2    |
| Outcome data                 | 15*     | Report numbers of outcome events or summary measures                                                                                                                                              | Table 2              |

|    |                          |    |                                                                         |
|----|--------------------------|----|-------------------------------------------------------------------------|
| 1  |                          |    |                                                                         |
| 2  | Main results             | 16 | (a) Give unadjusted estimates and, if applicable, confounder-adjusted   |
| 3  |                          |    | estimates and their precision (eg, 95% confidence interval). Make       |
| 4  |                          |    | clear which confounders were adjusted for and why they were             |
| 5  |                          |    | included                                                                |
| 6  |                          |    |                                                                         |
| 7  |                          |    | (b) Report category boundaries when continuous variables were           |
| 8  |                          |    | categorized                                                             |
| 9  |                          |    |                                                                         |
| 10 |                          |    | (c) If relevant, consider translating estimates of relative risk into   |
| 11 |                          |    | absolute risk for a meaningful time period                              |
| 12 | Other analyses           | 17 | Report other analyses done—eg analyses of subgroups and                 |
| 13 |                          |    | interactions, and sensitivity analyses                                  |
| 14 |                          |    |                                                                         |
| 15 | <b>Discussion</b>        |    |                                                                         |
| 16 | Key results              | 18 | Summarise key results with reference to study objectives                |
| 17 |                          |    |                                                                         |
| 18 | Limitations              | 19 | Discuss limitations of the study, taking into account sources of        |
| 19 |                          |    | potential bias or imprecision. Discuss both direction and magnitude     |
| 20 |                          |    | of any potential bias                                                   |
| 21 | Interpretation           | 20 | Give a cautious overall interpretation of results considering           |
| 22 |                          |    | objectives, limitations, multiplicity of analyses, results from similar |
| 23 |                          |    | studies, and other relevant evidence                                    |
| 24 |                          |    |                                                                         |
| 25 | Generalisability         | 21 | Discuss the generalisability (external validity) of the study results   |
| 26 |                          |    |                                                                         |
| 27 | <b>Other information</b> |    |                                                                         |
| 28 | Funding                  | 22 | Give the source of funding and the role of the funders for the present  |
| 29 |                          |    | study and, if applicable, for the original study on which the present   |
| 30 |                          |    | article is based                                                        |
| 31 |                          |    |                                                                         |

\*Give information separately for exposed and unexposed groups.

# BMJ Open

## Seroprevalence of SARS-CoV-2 specific IgG antibodies in Kashmir, India, seven months after the first reported local COVID-19 case: results of a population-based seroprevalence survey from October-November, 2020

|                               |                                                                                                                                                                                                                                                                                                                                                                                                                                                                                                                                                                                                                                                                                                                                                                                                                                                                                                                                                                                                                                                                                                                                                                                                                                                                                                                                                                                                                                                                                                                                                                                                                                                                                                                                                                                                                                                                                                                                                                                                               |
|-------------------------------|---------------------------------------------------------------------------------------------------------------------------------------------------------------------------------------------------------------------------------------------------------------------------------------------------------------------------------------------------------------------------------------------------------------------------------------------------------------------------------------------------------------------------------------------------------------------------------------------------------------------------------------------------------------------------------------------------------------------------------------------------------------------------------------------------------------------------------------------------------------------------------------------------------------------------------------------------------------------------------------------------------------------------------------------------------------------------------------------------------------------------------------------------------------------------------------------------------------------------------------------------------------------------------------------------------------------------------------------------------------------------------------------------------------------------------------------------------------------------------------------------------------------------------------------------------------------------------------------------------------------------------------------------------------------------------------------------------------------------------------------------------------------------------------------------------------------------------------------------------------------------------------------------------------------------------------------------------------------------------------------------------------|
| Journal:                      | <i>BMJ Open</i>                                                                                                                                                                                                                                                                                                                                                                                                                                                                                                                                                                                                                                                                                                                                                                                                                                                                                                                                                                                                                                                                                                                                                                                                                                                                                                                                                                                                                                                                                                                                                                                                                                                                                                                                                                                                                                                                                                                                                                                               |
| Manuscript ID                 | bmjopen-2021-053791.R2                                                                                                                                                                                                                                                                                                                                                                                                                                                                                                                                                                                                                                                                                                                                                                                                                                                                                                                                                                                                                                                                                                                                                                                                                                                                                                                                                                                                                                                                                                                                                                                                                                                                                                                                                                                                                                                                                                                                                                                        |
| Article Type:                 | Original research                                                                                                                                                                                                                                                                                                                                                                                                                                                                                                                                                                                                                                                                                                                                                                                                                                                                                                                                                                                                                                                                                                                                                                                                                                                                                                                                                                                                                                                                                                                                                                                                                                                                                                                                                                                                                                                                                                                                                                                             |
| Date Submitted by the Author: | 14-Aug-2021                                                                                                                                                                                                                                                                                                                                                                                                                                                                                                                                                                                                                                                                                                                                                                                                                                                                                                                                                                                                                                                                                                                                                                                                                                                                                                                                                                                                                                                                                                                                                                                                                                                                                                                                                                                                                                                                                                                                                                                                   |
| Complete List of Authors:     | <p>Khan, S Muhammad; Government Medical College Srinagar, Community Medicine<br/>         Qurieshi, Mariya; Government Medical College Srinagar, Community Medicine<br/>         Haq, Inaamul; Government Medical College Srinagar, Community Medicine<br/>         Majid, Sabhiya; Government Medical College Srinagar, Biochemistry<br/>         Ahmad, Javid; Sher-i-Kashmir Institute of Medical Sciences, Community Medicine<br/>         Ayub, Taha; Government Medical College Srinagar, Community Medicine<br/>         Bhat, Ashfaq; SKIMS Medical College Srinagar, Community Medicine<br/>         Fazili, Anjum; Sher-i-Kashmir Institute of Medical Sciences, Community Medicine<br/>         Ganai, Abdul; Government Medical College Baramulla, Community Medicine<br/>         Jan, Yasmeen; SKIMS Medical College Srinagar, Community Medicine<br/>         Kaul, Rauf-ur-Rashid; Sher-i-Kashmir Institute of Medical Sciences, Community Medicine<br/>         Khan, Zahid; Government Medical College Baramulla, Community Medicine<br/>         Masoodi, Muneer; Government Medical College Anantnag, Community Medicine<br/>         Mushtaq, Beenish; SKIMS Medical College Srinagar, Community Medicine<br/>         Nazir, Fouzia; Government Medical College Anantnag, Community Medicine<br/>         Nazir, Muzamil; Government Medical College Baramulla, Community Medicine<br/>         Raja, Malik; Government Medical College Srinagar, Community Medicine<br/>         Rasool, Mahbooba; Government Medical College Anantnag, Community Medicine<br/>         Asma, Anjum; Government Medical College Srinagar, Community Medicine<br/>         Ayoub, Shifana; Government Medical College Srinagar, Community Medicine<br/>         Aziz, Munazza; Government of Jammu and Kashmir Directorate of Health Services<br/>         Bhat, Arif; Government Medical College Srinagar, Biochemistry<br/>         Chowdri, Iqra; Government Medical College Srinagar, Community</p> |

|                                    |                                                                                                                                                                                                                                                                                                                                                                                                                                                                                                                                                                                                                                                                                                                                                                                                                                                                     |
|------------------------------------|---------------------------------------------------------------------------------------------------------------------------------------------------------------------------------------------------------------------------------------------------------------------------------------------------------------------------------------------------------------------------------------------------------------------------------------------------------------------------------------------------------------------------------------------------------------------------------------------------------------------------------------------------------------------------------------------------------------------------------------------------------------------------------------------------------------------------------------------------------------------|
|                                    | Medicine<br>Ismail, Shaista; Government Medical College Srinagar, Community<br>Medicine<br>Kawoosa, Misbah; Government Medical College Srinagar, Community<br>Medicine<br>Khan, Mehvish; Government Medical College Srinagar, Community<br>Medicine<br>Khan, Mosin; Government Medical College Srinagar, Biochemistry<br>Kousar, Rafiya; Government Medical College Srinagar, Community<br>Medicine<br>Lone, Ab; Government Medical College Srinagar, Community Medicine<br>Nabi, Shahroz; Government Medical College Srinagar, Community<br>Medicine<br>Obaid, Mohammad; Government Medical College Srinagar, Biochemistry<br>Qazi, Tanzeela; Government Medical College Srinagar, Community<br>Medicine<br>Sabah, Iram; Government Medical College Srinagar, Community<br>Medicine<br>Sumji, Ishtiyag; Government Medical College Srinagar, Community<br>Medicine |
| <b>Primary Subject<br>Heading</b>: | Infectious diseases                                                                                                                                                                                                                                                                                                                                                                                                                                                                                                                                                                                                                                                                                                                                                                                                                                                 |
| Secondary Subject Heading:         | Epidemiology                                                                                                                                                                                                                                                                                                                                                                                                                                                                                                                                                                                                                                                                                                                                                                                                                                                        |
| Keywords:                          | COVID-19, EPIDEMIOLOGY, Epidemiology < INFECTIOUS DISEASES                                                                                                                                                                                                                                                                                                                                                                                                                                                                                                                                                                                                                                                                                                                                                                                                          |
|                                    |                                                                                                                                                                                                                                                                                                                                                                                                                                                                                                                                                                                                                                                                                                                                                                                                                                                                     |

SCHOLARONE™  
Manuscripts



I, the Submitting Author has the right to grant and does grant on behalf of all authors of the Work (as defined in the below author licence), an exclusive licence and/or a non-exclusive licence for contributions from authors who are: i) UK Crown employees; ii) where BMJ has agreed a CC-BY licence shall apply, and/or iii) in accordance with the terms applicable for US Federal Government officers or employees acting as part of their official duties; on a worldwide, perpetual, irrevocable, royalty-free basis to BMJ Publishing Group Ltd ("BMJ") its licensees and where the relevant Journal is co-owned by BMJ to the co-owners of the Journal, to publish the Work in this journal and any other BMJ products and to exploit all rights, as set out in our [licence](#).

The Submitting Author accepts and understands that any supply made under these terms is made by BMJ to the Submitting Author unless you are acting as an employee on behalf of your employer or a postgraduate student of an affiliated institution which is paying any applicable article publishing charge ("APC") for Open Access articles. Where the Submitting Author wishes to make the Work available on an Open Access basis (and intends to pay the relevant APC), the terms of reuse of such Open Access shall be governed by a Creative Commons licence – details of these licences and which [Creative Commons](#) licence will apply to this Work are set out in our licence referred to above.

Other than as permitted in any relevant BMJ Author's Self Archiving Policies, I confirm this Work has not been accepted for publication elsewhere, is not being considered for publication elsewhere and does not duplicate material already published. I confirm all authors consent to publication of this Work and authorise the granting of this licence.

1  
2  
3 **Seroprevalence of SARS-CoV-2 specific IgG antibodies in Kashmir, India, seven months after the first**  
4 **reported local COVID-19 case: results of a population-based seroprevalence survey from October-**  
5 **November, 2020**  
6

7 S Muhammad Salim Khan,<sup>1</sup> Mariya Amin Qurieshi,<sup>1</sup> Inaamul Haq,<sup>1</sup> Sabhiya Majid,<sup>2</sup> Javid Ahmad,<sup>3\*</sup> Taha  
8 Ayub,<sup>1\*</sup> Ashfaq Ahmad Bhat,<sup>4\*</sup> Anjum Bashir Fazili,<sup>3\*</sup> Abdul Majeed Ganai,<sup>5\*</sup> Yasmeen Jan,<sup>4\*</sup> Rauf-ur-  
9 Rashid Kaul,<sup>3\*</sup> Zahid Ali Khan,<sup>5\*</sup> Muneer Ahmad Masoodi,<sup>6\*</sup> Beenish Mushtaq,<sup>4\*</sup> Fouzia Nazir,<sup>6\*</sup> Muzamil  
10 Nazir,<sup>5\*</sup> Malik Waseem Raja,<sup>1\*</sup> Mahbooba Rasool,<sup>6\*</sup> Anjum Asma,<sup>1†</sup> Shifana Ayoub,<sup>1†</sup> Munazza Aziz,<sup>7†</sup> Arif  
11 Akbar Bhat,<sup>2†</sup> Iqra Nisar Chowdri,<sup>1†</sup> Shaista Ismail,<sup>1†</sup> Misbah Ferooz Kawoosa,<sup>1†</sup> Mehvish Afzal Khan,<sup>1†</sup>  
12 Mosin Saleem Khan,<sup>2†</sup> Rafiya Kousar,<sup>1†</sup> Ab Aziz Lone,<sup>1†</sup> Shahroz Nabi,<sup>1†</sup> Mohammad Obaid,<sup>1†</sup> Tanzeela  
13 Bashir Qazi,<sup>1†</sup> Iram Sabah,<sup>1†</sup> Ishtiyah Ahmad Sumji<sup>1†</sup>  
14

15  
16 \*Authors in alphabetical order, Contributed equally

17  
18 †Authors in alphabetical order, Contributed equally

19  
20 Corresponding author:

21  
22 Dr. Inaamul Haq, Department of Community Medicine, Government Medical College, Srinagar, Jammu &  
23 Kashmir, 190010, India. Email: [haqinaam@yahoo.co.in](mailto:haqinaam@yahoo.co.in)  
24

25 Affiliation

26  
27 <sup>1</sup> Department of Community Medicine, Government Medical College Srinagar, Jammu & Kashmir, India

28  
29 <sup>2</sup> Department of Biochemistry, Government Medical College, Srinagar, Jammu & Kashmir, India

30  
31 <sup>3</sup> Department of Community Medicine, Sher-i-Kashmir Institute of Medical Sciences, Srinagar, Jammu &  
32 Kashmir, India

33  
34 <sup>4</sup> Department of Community Medicine, SKIMS Medical College, Srinagar, Jammu & Kashmir, India

35  
36 <sup>5</sup> Department of Community Medicine, Government Medical College Baramulla, Jammu & Kashmir, India

37  
38 <sup>6</sup> Department of Community Medicine, Government Medical College Anantnag, Jammu & Kashmir, India

39  
40 <sup>7</sup> Directorate of Health Services Kashmir, Government of Jammu & Kashmir, India

41  
42 Word Count: 3353 (excluding abstract, tables, and references)  
43  
44  
45  
46  
47  
48  
49  
50  
51  
52  
53  
54  
55  
56  
57  
58  
59  
60

## ABSTRACT

**Objectives:** We designed a population-based survey in Kashmir to estimate the seroprevalence of SARS-CoV-2 specific IgG antibodies in the general population aged 18 years and above.

**Setting:** The survey was conducted among 110 villages and urban wards across ten districts in Kashmir from 17 Oct 2020 to 04 Nov 2020.

**Participants:** Individuals aged 18 years and above were eligible to be included in the survey. Serum samples were tested for the presence of SARS-CoV-2 specific IgG antibodies using the Abbott SARS-CoV-2 IgG assay.

**Primary and secondary outcome measures:** We labeled assay results equal to or above the cut-off index value of 1.4 as positive for SARS-CoV-2 specific IgG antibodies. Seroprevalence estimates were adjusted for the sampling design and assay characteristics.

**Results:** Out of 6397 eligible individuals enumerated, 6315 (98.7%) agreed to participate. The final analysis was done on 6230 participants. Seroprevalence adjusted for the sampling design and assay characteristics was 36.7% (95% CI 34.3%-39.2%). Seroprevalence was higher among the older population. Among seropositive individuals, 10.2% (247/2415) reported a history of COVID-19 like symptoms. Out of 474 symptomatic individuals, 233 (49.2%) reported having been tested. We estimated an infection fatality rate of 0.034%.

**Conclusions:** During the first seven months of the COVID-19 epidemic in Kashmir valley, approximately 37% of individuals were infected. A large proportion of the population remains susceptible to the infection. The experience of a second wave of COVID-19 in April-June 2021, the appearance of virus variants, and the introduction of vaccination programs warrant robust surveillance of the epidemic.

## ARTICLE SUMMARY

### Strengths and limitations of this study

- The findings of our study are based on a representative sample of the population.
- The laboratory test used for the detection of SARS-CoV-2 specific IgG antibodies in serum samples provides valid results.
- We report seroprevalence estimates adjusted for sampling design and test performance.
- Even though we adjusted the weighted seroprevalence estimates for test performance using manufacturer-provided sensitivity and specificity (100% and 99.63% respectively), we did not quantify the test validity in-house.
- Because of lack of age- and gender-specific mortality data we could not estimate age- and gender-specific infection fatality rates.

## INTRODUCTION

On 11 Feb 2020, the World Health Organization announced that the disease caused by the Severe Acute Respiratory Syndrome Coronavirus 2 (SARS-CoV-2) will be named coronavirus disease (COVID-19).[1] In Kashmir, the first case of COVID-19 was confirmed in Srinagar city on 18 Mar 2020.[2] The government imposed the first phase of the lockdown in Kashmir on 24 March 2020. During this phase, inter-state travel remained suspended. People were barred from moving outside except in an emergency. Except



1  
2  
3 for essential services, all government and private offices were advised to work from home. Universal  
4 masking was made mandatory. The lockdown was extended till 31 May 2020 and later relaxed in a  
5 phased manner.  
6

7 Mild or asymptomatic infections are common in Coronavirus disease 2019 (COVID-19) and are an  
8 important source of infection transmission.[3,4] Such cases are less likely to be detected by a  
9 surveillance system based on reverse-transcriptase polymerase chain reaction (RT-PCR) testing. The  
10 number of reported RT-PCR positive cases are an underestimate of the true number of infections in a  
11 population.  
12  
13

14 Seroprevalence surveys have been conducted in various countries at different stages of the current  
15 epidemic among various population groups.[5–14] Seroprevalence surveys provide a more accurate  
16 estimate of past infection, improve understanding of the infection transmission dynamics, and guide  
17 public health response.[15]  
18

19 We designed this survey with the primary objective to estimate the seroprevalence of severe acute  
20 respiratory syndrome coronavirus 2 (SARS-CoV-2) specific IgG antibodies in the adult population of  
21 Kashmir valley.  
22  
23

## 24 **METHODS**

25  
26 We designed a population-based cross-sectional study. The study covered all the ten districts of  
27 Kashmir, a valley in northern India. (Figure 1) We completed data collection in three weeks, from 17 Oct  
28 2020 to 04 Nov 2020.  
29

### 30 **Ethics**

31  
32 We obtained written informed consent from all study participants. The study was approved by the  
33 Institutional Ethics Committee of Government Medical College Srinagar (reference number:  
34 1004/ETH/GMC). We used anonymized participant data for analysis.  
35

### 36 **Sample size**

37  
38 Based on the results of a previous study conducted in July 2020, we speculated that, by October 2020,  
39 the prevalence would have increased to around 20%.[16] We calculated the minimum sample size based  
40 on an anticipated seroprevalence of 20%, an absolute precision of 2%, and a design effect of 2. We used  
41 OpenEpi to make sample size calculations.[17] We adjusted the sample size for a possible non-response  
42 of 10% to obtain a minimum size of 3376. We decided to select 3600 individuals from nine of the ten  
43 districts (except district Srinagar). To obtain precise estimates for district Srinagar, sample size  
44 estimation was made for the district separately. We used a design effect of 1.5, an anticipated  
45 seroprevalence of 20%, and absolute precision of 2% to obtain a sample size of 2302 for the district,  
46 which was further increased to 2400 to account for non-response. We thus targeted a total sample size  
47 of 6000 (3600 + 2400).  
48  
49  
50

### 51 **Participants**

52  
53 All adults  $\geq 18$  years of age were eligible to participate in the study. We selected eligible participants  
54 using a three-stage stratified cluster sampling technique. We listed all clusters in the valley using the  
55 Census 2011 data.[18] Within each of the ten districts in the valley, clusters were stratified into urban  
56  
57

1  
2  
3 and rural clusters. We selected clusters within each of the 20 strata by probability proportionate to size  
4 (PPS) sampling. Except for district Srinagar which we oversampled to obtain precise seroprevalence  
5 estimates for, ten clusters were randomly selected from each district. We selected 20 clusters from  
6 district Srinagar. We divided each selected cluster into four equal areas and chose a central location  
7 within each of the four areas as the starting point. Thereafter, we approached consecutive households  
8 to enroll at least ten eligible participants. We thus identified a total of 440 random locations within 110  
9 clusters in ten districts. We invited all eligible adults in a household for participation.  
10  
11

## 12 **Variables**

13  
14 The main outcome variable of interest was SARS-CoV-2 specific IgG antibodies. We obtained information  
15 from participants about their age, gender, history of COVID-19 like symptoms in the three months  
16 before the interview date, history of contact with a known COVID-19 patient, and history of COVID-19  
17 testing.  
18

## 19 **Procedure**

20  
21 We informed eligible adults about the purpose and the procedure of the study. Study participation was  
22 voluntary. Participants were interviewed by health personnel specifically trained for the interview.  
23 Interview responses were recorded in an Epicollect5 form.[19] Once the interview was completed, a  
24 trained phlebotomist collected 3-5 mL of venous blood from the antecubital vein under aseptic  
25 precautions into a red-top collection tube containing a clot activator. The tube was left standing,  
26 undisturbed, for at least 30 minutes for clot formation. The sample was later transported to a central  
27 facility for centrifugation. Centrifuged samples were transported to a central laboratory for further  
28 processing and analysis. Serum samples were tested for the presence of SARS-CoV-2 specific IgG  
29 antibodies using the Abbott SARS-CoV-2 IgG assay. The assay uses chemiluminescence to detect IgG  
30 antibodies against the SARS-CoV-2 nucleocapsid protein. The reported sensitivity and specificity of the  
31 assay are 100% (95% CI 95.89-100.00) and 99.63% (99.05-99.90), respectively.[20] As recommended by  
32 the manufacturer, we labeled assay results equal to or above the cut-off index value of 1.4 as positive  
33 for SARS-CoV-2 specific IgG antibodies.  
34  
35  
36  
37

## 38 **Statistical methods**

39  
40 We report unweighted seroprevalence estimates in percentages. We used the Agresti-Coull procedure  
41 to calculate a 95% confidence interval (CI) for seroprevalence estimates.[21] A weighted estimate of  
42 seroprevalence is provided. To calculate survey weights (inverse of sampling probability) we used the  
43 estimated population of the districts. We used the census 2011 data and growth rates from Sample  
44 Registration System to estimate the population of the districts in 2020.[18,22] Survey weights so  
45 obtained were further adjusted for non-response and age and sex structure (post-stratification weights).  
46 We further adjusted the weighted seroprevalence estimates for test performance to calculate  
47 “weighted seroprevalence adjusted for test performance”. We did this using the formula:  
48 *Weighted seroprevalence adjusted for test performance* =  
49  $(\text{Weighted seroprevalence} + \text{Test specificity} - 1) / (\text{Test sensitivity} + \text{Test specificity} - 1)$ . [23]  
50  
51

52 We used the manufacturer-provided sensitivity and specificity in the above formula.[20] We used the  
53 lower and upper bounds of the manufacturer-provided test performance to report sensitivity analyses.  
54  
55  
56  
57

We analyzed the difference in seroprevalence estimates across levels of a categorical variable using a Chi-square test adjusted for the sampling design.

We estimated the number of SARS-CoV-2 infections by multiplying the weighted seroprevalence adjusted for test performance with the estimated population of the valley. To estimate the number of infections per reported case, we divided the estimated number of SARS-CoV-2 infections by the reported number of COVID-19 cases two weeks before the survey date. We calculated the infection fatality rate by dividing the reported number of deaths by the number of estimated infections, assuming a three-week lag time from infection to death.[24]

We analyzed the data using Stata version 15 (StataCorp. 2017. Stata Statistical Software: Release 15. College Station, TX: StataCorp LP.).

### Patient and Public Involvement

No patients or members of the public were involved in this study.

### RESULTS

We enumerated 6 397 individuals  $\geq 18$  years from 3 077 households and 110 clusters (34 urban clusters and 76 rural clusters) between 17 Oct 2020 and 04 Nov 2020. Out of the 6 397 eligible individuals, 6 315 (98.7%) agreed to participate and were enrolled. The final analysis was done on a sample of 6 230 participants. (Figure 2)

Of the 6 230 participants, 1 513 (24.3%) were between 18 and 30 years of age, 2 672 (42.9%) were aged 30-49 years, 1 643 (26.4%) were aged 50-69 years, and 402 (6.4%) were 70 years and older. (Table 1). There was equal representation from males and females, and 3 364 (54.0%) resided in a rural area. Of the 3 104 females, 56 (1.8%) reported pregnant at the time of the survey. Four hundred seventy-four (7.6%) reported COVID-19 like symptoms in the three months preceding the survey and 439 (7.0%) reported to have ever come in contact with a known COVID-19 case. One thousand ninety-two (17.5%) reported having been tested for COVID-19 using RT-PCR or a Rapid Antigen Test (RAT) previously, of whom 176 (16.2%) reported to have tested positive for the disease.

**Table 1: Characteristics of study participants**

|                   | Frequency | Percent |
|-------------------|-----------|---------|
| <b>Total</b>      | 6230      |         |
| <b>Age, years</b> |           |         |
| 18-29             | 1513      | 24.3    |
| 30-49             | 2672      | 42.9    |
| 50-69             | 1643      | 26.4    |
| $\geq 70$         | 402       | 6.5     |
| <b>Gender</b>     |           |         |
| Male              | 3126      | 50.2    |
| Female            | 3104      | 49.8    |
| <b>Residence</b>  |           |         |
| Urban             | 2866      | 46.0    |
| Rural             | 3364      | 54.0    |

|                                                      |      |      |
|------------------------------------------------------|------|------|
| <b>Pregnant (n=3104)</b>                             | 56   | 1.8  |
| <b>Self-reported history of chronic disease</b>      | 1145 | 18.4 |
| <b>History of COVID-19 like symptoms</b>             | 474  | 7.6  |
| <b>History of contact with a known COVID-19 case</b> | 439  | 7.0  |
| <b>Ever tested for COVID-19 (RT-PCR)</b>             | 1092 | 17.5 |
| <b>RT-PCR result (n=1088*)</b>                       |      |      |
| Positive                                             | 176  | 16.2 |
| Negative                                             | 912  | 83.8 |

COVID-19: Coronavirus disease; RT-PCR: Reverse transcriptase-polymerase chain reaction

\*RT-PCR result not known in four participants

We found an overall unweighted seroprevalence of 38.8% (95% CI 37.6 – 40.0). The seroprevalence ranged from 28.5% in district Kulgam to 43.1% in district Pulwama. (Figure 1 and online supplemental file 1) The overall weighted seroprevalence (adjusted for sampling design) was 36.9% (95% CI 34.5 – 39.4). The weighted seroprevalence adjusted for test performance was 36.7% (95% CI 34.3 – 39.2). (Table 2) Upon sensitivity analyses, the weighted seroprevalence adjusted for test performance ranged from 36.3% (95% CI 33.9 – 38.8) to 38.4% (95% CI 35.9 – 41.0). (Table 3)

**Table 2: Seroprevalence of SARS-CoV-2 specific IgG antibodies by participant characteristics**

|                   | Number tested | Number seropositive | Unweighted seroprevalence, % (95% CI) | Weighted seroprevalence, % (95% CI) | Weighted seroprevalence adjusted for test performance, % (95% CI) | Design-based F, p-value |
|-------------------|---------------|---------------------|---------------------------------------|-------------------------------------|-------------------------------------------------------------------|-------------------------|
| <b>Total</b>      | 6230          | 2415                | 38.8 (37.6-40.0)                      | 36.9 (34.5-39.4)                    | 36.7 (34.3-39.2)                                                  |                         |
| <b>Age, years</b> |               |                     |                                       |                                     |                                                                   |                         |
| 18-29             | 1513          | 538                 | 35.6 (33.2-38.0)                      | 33.7 (30.1-37.6)                    | 33.5 (29.8-37.4)                                                  | 6.42, 0.0006            |
| 30-49             | 2672          | 1000                | 37.4 (35.6-39.3)                      | 36.3 (33.5-39.3)                    | 36.1 (33.3-39.1)                                                  |                         |
| 50-69             | 1643          | 691                 | 42.1 (39.7-44.5)                      | 42.5 (38.8-46.2)                    | 42.3 (38.6-46.0)                                                  |                         |
| ≥70               | 402           | 186                 | 46.3 (41.5-51.2)                      | 45.3 (37.8-53.0)                    | 45.1 (37.6-52.8)                                                  |                         |
| <b>Gender</b>     |               |                     |                                       |                                     |                                                                   |                         |
| Male              | 3126          | 1166                | 37.3 (35.6-39.0)                      | 36.1 (33.5-38.9)                    | 35.9 (33.3-38.7)                                                  | 0.94, 0.34              |
| Female            | 3104          | 1249                | 40.2 (38.5-42.0)                      | 37.8 (34.5-41.3)                    | 37.6 (34.3-41.1)                                                  |                         |
| <b>Residence</b>  |               |                     |                                       |                                     |                                                                   |                         |
| Urban             | 2866          | 1180                | 41.2 (39.4-43.0)                      | 40.2 (36.3-44.1)                    | 40.0 (36.1-43.9)                                                  | 3.43, 0.07              |
| Rural             | 3364          | 1235                | 36.7 (35.1-38.4)                      | 35.5 (32.5-38.7)                    | 35.3 (32.2-38.5)                                                  |                         |

|                                                      |      |      |                  |                  |                  |                |
|------------------------------------------------------|------|------|------------------|------------------|------------------|----------------|
| <b>Self-reported history of chronic disease</b>      |      |      |                  |                  |                  |                |
| Yes                                                  | 1145 | 495  | 43.2 (40.4-46.1) | 41.9 (37.4-46.6) | 41.7 (37.2-46.4) | 6.14, 0.02     |
| No                                                   | 5085 | 1920 | 37.8 (36.4-39.1) | 36.2 (33.7-38.9) | 36.0 (33.5-38.7) |                |
| <b>History of COVID-19 like symptoms</b>             |      |      |                  |                  |                  |                |
| Yes                                                  | 474  | 247  | 52.1 (47.6-56.6) | 47.4 (37.9-57.1) | 47.2 (37.7-56.9) | 5.53, 0.02     |
| No                                                   | 5756 | 2168 | 37.7 (36.4-38.9) | 36.3 (33.9-38.8) | 36.1 (33.7-38.6) |                |
| <b>History of contact with a known COVID-19 case</b> |      |      |                  |                  |                  |                |
| Yes                                                  | 439  | 219  | 49.9 (45.2-54.5) | 45.2 (38.3-52.2) | 45.0 (38.1-52.0) | 7.13, 0.01     |
| No                                                   | 5791 | 2196 | 37.9 (36.7-39.2) | 36.5 (34.1-39.0) | 36.3 (33.9-38.8) |                |
| <b>Ever tested for COVID-19 (RT-PCR)</b>             |      |      |                  |                  |                  |                |
| Yes                                                  | 1092 | 485  | 44.4 (41.5-47.4) | 41.0 (35.4-46.9) | 40.8 (35.2-46.7) | 2.17, 0.14     |
| No                                                   | 5138 | 1930 | 37.6 (36.2-38.9) | 36.2 (33.5-39.0) | 36.0 (33.3-38.8) |                |
| <b>RT-PCR result (n=1088*)</b>                       |      |      |                  |                  |                  |                |
| Positive                                             | 176  | 140  | 79.5 (73.0-84.9) | 81.8 (74.8-87.1) | 81.7 (74.7-87.1) | 74.93, <0.0001 |
| Negative                                             | 912  | 345  | 37.8 (34.7-41.0) | 38.8 (33.3-44.7) | 38.6 (33.1-44.5) |                |

COVID-19: Coronavirus disease; RT-PCR: Reverse transcriptase-polymerase chain reaction

\*RT-PCR result not known in four participants

**Table 3: Sensitivity analyses for seroprevalence at extremes of test performance**

|                   | Weighted seroprevalence, % (95% CI) | Weighted seroprevalence adjusted for test performance, % (95% CI) [Sensitivity 100.00%, Specificity 99.63%] | Weighted seroprevalence adjusted for test performance, % (95% CI) [Sensitivity 95.89%, Specificity 99.90%] | Weighted seroprevalence adjusted for test performance, % (95% CI) [Sensitivity 100.00%, Specificity 99.05%] |
|-------------------|-------------------------------------|-------------------------------------------------------------------------------------------------------------|------------------------------------------------------------------------------------------------------------|-------------------------------------------------------------------------------------------------------------|
| <b>Overall</b>    | 36.9 (34.5-39.4)                    | 36.7 (34.3-39.2)                                                                                            | 38.4 (35.9-41.0)                                                                                           | 36.3 (33.9-38.8)                                                                                            |
| <b>Age, years</b> |                                     |                                                                                                             |                                                                                                            |                                                                                                             |
| 18-29             | 33.7 (30.1-37.6)                    | 33.5 (29.8-37.4)                                                                                            | 35.1 (31.3-39.1)                                                                                           | 33.1 (29.4-37.0)                                                                                            |
| 30-49             | 36.3 (33.5-39.3)                    | 36.1 (33.3-39.1)                                                                                            | 37.8 (34.9-40.9)                                                                                           | 35.7 (32.9-38.7)                                                                                            |

|                                                      |                   |                  |                  |                  |
|------------------------------------------------------|-------------------|------------------|------------------|------------------|
| 50-69                                                | 42.5 (938.8-46.2) | 42.3 (38.6-46.0) | 44.3 (40.4-48.1) | 41.9 (38.2-45.7) |
| ≥70                                                  | 45.3 (937.8-53.0) | 45.1 (37.6-52.8) | 47.2 (39.4-55.2) | 44.8 (37.2-52.5) |
| <b>Gender</b>                                        |                   |                  |                  |                  |
| Male                                                 | 36.1 (33.5-38.9)  | 35.9 (33.3-38.7) | 37.6 (34.9-40.5) | 35.5 (32.9-38.3) |
| Female                                               | 37.8 (34.5-41.3)  | 37.6 (34.3-41.1) | 39.4 (35.9-43.0) | 37.2 (33.9-40.7) |
| <b>Residence</b>                                     |                   |                  |                  |                  |
| Urban                                                | 40.2 (36.3-44.1)  | 40.0 (36.1-43.9) | 41.9 (37.8-45.9) | 39.6 (35.7-43.6) |
| Rural                                                | 35.5 (32.5-38.7)  | 35.3 (32.2-38.5) | 37.0 (33.8-40.3) | 34.9 (31.9-38.1) |
| <b>Self-reported history of chronic disease</b>      |                   |                  |                  |                  |
| Yes                                                  | 43.2 (40.4-46.1)  | 41.9 (37.4-46.6) | 43.6 (38.9-48.5) | 41.3 (36.8-46.1) |
| No                                                   | 37.8 (36.4-39.1)  | 36.2 (33.7-38.9) | 37.7 (35.1-40.5) | 35.6 (33.1-38.3) |
| <b>History of COVID-19 like symptoms</b>             |                   |                  |                  |                  |
| Yes                                                  | 52.1 (47.6-56.6)  | 47.4 (37.9-57.1) | 49.4 (39.5-59.5) | 46.9 (37.3-56.7) |
| No                                                   | 37.7 (36.4-38.9)  | 36.3 (33.9-38.8) | 37.8 (35.3-40.4) | 35.7 (33.3-38.2) |
| <b>History of contact with a known COVID-19 case</b> |                   |                  |                  |                  |
| Yes                                                  | 49.9 (45.2-54.5)  | 45.2 (38.3-52.2) | 47.1 (39.9-54.4) | 44.7 (37.7-51.7) |
| No                                                   | 37.9 (36.7-39.2)  | 36.5 (34.1-39.0) | 38.0 (35.5-40.6) | 35.9 (33.5-38.4) |
| <b>Ever tested for COVID-19 (RT-PCR)</b>             |                   |                  |                  |                  |
| Yes                                                  | 44.4 (41.5-47.4)  | 41.0 (35.4-46.9) | 42.7 (36.9-48.9) | 40.4 (34.8-46.4) |
| No                                                   | 37.6 (36.2-38.9)  | 36.2 (33.5-39.0) | 37.7 (34.9-40.6) | 35.6 (32.9-38.4) |
| <b>RT-PCR result (n=1088*)</b>                       |                   |                  |                  |                  |
| Positive                                             | 79.5 (73.0-84.9)  | 81.8 (74.8-87.1) | 85.3 (78.0-90.8) | 81.6 (74.6-87.0) |
| Negative                                             | 37.8 (34.7-41.0)  | 38.8 (33.3-44.7) | 40.4 (34.7-46.6) | 38.2 (32.7-44.2) |

Seroprevalence was lowest among participants aged 18-29 years [33.5% (95% CI 29.8 – 37.4)] and was higher in older age groups. Seroprevalence was highest in those aged 70 years and above [45.1% (95% CI 37.6 – 52.8)]. Seroprevalence was not significantly different among males and females ( $p=0.34$ ). The seroprevalence among urban residents was 40.0% (95% CI 36.1 – 43.9), slightly but not significantly, higher than rural residents [35.3% (95% CI 32.2 – 38.5),  $p=0.07$ ]. (Table 2)

One in five participants (1145/6230, 18.4%) self-reported a history of at least one chronic disease (Table 1). Hypertension (815/6230, 13.1%) and diabetes mellitus (314/6230, 5.0%) were the most commonly reported chronic diseases (online supplemental file 2). Seroprevalence was significantly higher in participants who self-reported history of chronic disease (41.7%, 95% CI 37.2 – 46.4) as compared to those who did not report a history of chronic disease (36.0%, 95% CI 33.5 - 38.7) (Table 2).

Among participants who reported a history of COVID-19 like symptoms, seroprevalence was 47.2% (95% CI 37.7 – 56.9) compared with 36.1% (95% CI 33.7 – 38.6) among participants who did not report such

1  
2  
3 symptoms. Seroprevalence was higher among those who reported contact with a known COVID-19 case  
4 [45.0% (95% CI 38.1 – 52.0)] than participants who did not report any history of such contact [36.3%  
5 (95% CI 33.9 – 38.8)]. (Table 2)  
6

7 Seroprevalence was not significantly related to being tested for COVID-19 (RT-PCR). However, those who  
8 reported a positive RT-PCR COVID-19 test had significantly higher seroprevalence (81.7%, 95% CI 74.7 –  
9 87.1) as compared to those who reported a negative RT-PCR COVID-19 test (38.6%, 95% CI 33.1 – 44.5).  
10 (Table 2)  
11

12  
13 Among 2 415 seropositive individuals, only 247 (10.2%) reported a history of COVID-19 like symptoms.  
14 Only 20.1% (485/2415) of the seropositive individuals were tested for COVID-19 (RT-PCR). Among 474  
15 who reported a history of COVID-19 like symptoms, 233 (49.2%) were tested for COVID-19 (RT-PCR).  
16 Among 4897 individuals who did not report a history of COVID-19 like symptoms and were never tested  
17 for COVID-19 (RT-PCR), 1825 (37.3%) were seropositive. (Figure 3)  
18

19  
20 Among 36 participants who reported a positive RT-PCR COVID-19 test but were seronegative, the  
21 duration between COVID-19 RT-PCR test and serological testing ranged from 9 days to 101 days. In only  
22 four of these 36 participants, the duration between the COVID-19 RT-PCR test and the serological test  
23 was 14 days or less. Of the remaining 32 participants, 21 did not report a history of COVID-19 like  
24 symptoms, nine did not report a history of contact with a known COVID-19 case, and eight reported  
25 neither a history of COVID-19 like symptoms nor a history of contact with a known COVID-19 case.  
26

27 We estimated that there were 1 673 484 (95% CI 1 564 047 – 1 787 482) cumulative number of  
28 infections among adults aged  $\geq 18$  years in the valley by 03 Oct 2020, two weeks before the start of the  
29 survey. If we assume that the seroprevalence was similar to the overall seroprevalence in the population  
30 not included in our study ( $< 18$  years of age) then the estimated cumulative number of infections in the  
31 valley by 03 Oct 2020 was 2 791 933 (95% CI 2 609 354 – 2 982 119). Considering that the cumulative  
32 number of reported COVID-19 cases was 47 071 by 03 Oct 2020 (Figure 4), we estimate the number of  
33 infections per reported case as 59.3 (95% CI 55.4 – 63.4). The number of reported COVID-19 deaths after  
34 a three-week lag period (on 24 Oct 2020) was 955. Thus, we estimated the infection fatality rate as  
35 0.034% (95% CI 0.032 – 0.037).  
36  
37  
38

39 Figure 5 depicts the relationship between the estimated number of SARS-CoV-2 infected persons,  
40 reported COVID-19 cases, and reported COVID-19 deaths. Of the total estimated SARS-CoV-2 infected  
41 persons, only 1.69% were reported. Of the total reported COVID-19 cases, 2.03% died.**DISCUSSION**  
42

43 The results of our study indicate that by the first week of October 2020, nearly seven months after the  
44 appearance of the first laboratory-confirmed COVID-19 case on 18 March 2020, close to 37% of the  
45 valley's population aged  $\geq 18$  years had been infected. Our results suggest that the cumulative number of  
46 SARS-CoV-2 infections by the first week of October 2020 was nearly 2.8 million with an estimated  
47 infection fatality rate of 0.034%. Seroprevalence did not differ by gender but was higher in older age  
48 groups.  
49

50  
51 The findings of our study are based on a representative sample of the population. The laboratory test  
52 used for the detection of SARS-CoV-2 specific IgG antibodies in serum samples provides valid  
53 results.[20,25] We report seroprevalence estimates adjusted for sampling design and test performance.  
54  
55  
56  
57

1  
2  
3 The overall adjusted seroprevalence of around 37% indicates that a large proportion of the valley's  
4 population has been infected with the virus. Easing of lockdown, being fed up with the restrictions, and  
5 non-adherence to prevention norms are the possible reasons. Even though a large proportion of the  
6 population has been infected, the transmission of infection is expected to continue till most of the  
7 susceptible population becomes immune. Herd immunity in the context of COVID-19 is a matter of  
8 debate as reports of a second infection continue to pour in.[26] The emergence of several Variants of  
9 Concern and the introduction of COVID-19 vaccination will also influence population immunity. Several  
10 factors potentially influence the seroprevalence rates. These include population density, social and  
11 demographic structure of the population, governmental policies and the extent of their implementation,  
12 immunity level of the population, time since the start of infection transmission, adherence to infection  
13 prevention guidelines, quality of contact tracing and quarantine, and possibly the geography and  
14 environment of an area.  
15  
16  
17

18 Comparison with previous reports suggests that the seroprevalence has increased almost ten-fold since  
19 July 2020.[16,27] The second of the three nationwide seroprevalence surveys in India conducted in  
20 August-September 2020 reports an overall seroprevalence of 6.6% ranging from 5.2% in rural areas to  
21 16.9% in urban slums.[28] A nationwide survey conducted in December 2020-January 2021 reported an  
22 overall seroprevalence of 24.1% ranging from 4.9% - 44.4% across districts.[29] Kashmir is thus not a  
23 low-infection area. Being an oft-visited tourist area, Kashmir is at an increased risk of infection  
24 transmission. Adherence to COVID appropriate behavior (use of face masks in public, frequent  
25 handwashing, physical and social distancing) has been poor. With the introduction of the COVID-19  
26 vaccination program in January 2021 and the emergence of a 'second wave' in Kashmir in April 2021, the  
27 seroprevalence estimates are expected to increase in the future.  
28  
29  
30

31 The seroprevalence of SARS-CoV-2 IgG antibodies was higher in older age groups. During the early  
32 period of the pandemic, people were adherent to social distancing and other non-pharmaceutical  
33 interventions because of a fear of the disease and administrative restrictions. With time, administrative  
34 restrictions were relaxed, fear of the disease attenuated, and people became sort of fed up with the  
35 social restrictions. This not only led to an increase in the number of reported COVID-19 cases but also  
36 provided the population, including older age groups, an opportunity to contract the infection. That older  
37 people have an increased risk of symptomatic and more severe disease is now well known.[30,31]  
38 However, age-based differential susceptibility to SARS-CoV-2 infection antibody response and the  
39 reasons thereof are still a grey area and need further understanding. Existing literature might suggest  
40 that the young who are more mobile and socially active have a higher risk of infection.[6,7] However,  
41 this should not imply that the elderly have a decreased susceptibility to SARS-CoV-2 infection or a  
42 decreased antibody response.[32] On the contrary, several studies suggest that the seroprevalence of  
43 SARS-CoV-2 specific IgG antibodies is higher in the older age groups and particularly so in more dense  
44 population groups.[4,5,8-11,13] Furthermore, SARS-CoV-2 antibody levels have been reported to be  
45 higher in older people.[12]  
46  
47  
48  
49

50 The seroprevalence of SARS-CoV-2 specific IgG antibodies did not differ significantly by gender, though  
51 the figure was slightly higher for females. These findings are consistent with the available  
52 literature.[6,13] Difference in seroprevalence by gender has been suggested by some studies and  
53 females have been reported to have lower antibody levels.[5,7,9,11,12,14,33]  
54  
55  
56  
57



1  
2  
3 Urban areas are more densely populated as compared to rural areas which accelerate the transmission  
4 of infections in the population. The seroprevalence of SARS-CoV-2 specific IgG antibodies is thus  
5 expected to be higher in urban areas especially during the early phases of an epidemic. As the epidemic  
6 progresses the seroprevalence gap between urban and rural areas will wane off. We estimated an  
7 adjusted seroprevalence of 40.0% (95% CI 36.1 – 43.9) in urban areas as compared to 35.3% (95% CI  
8 32.2 – 38.5) in rural areas (p=0.07).

9  
10  
11 People with a chronic disease experience more severe COVID-19 symptoms and are more likely to die  
12 when compared to people with no chronic disease.[34] We found a higher proportion of symptomatic  
13 infection among participants with a self-reported history of chronic disease (78/1145, 6.8%) as  
14 compared to participants with no chronic disease (169/5085, 3.3%) (online supplemental file 3). Little is,  
15 however, known about the risk of infection in chronic disease patients. We found a significantly higher  
16 seroprevalence among participants with a self-reported history of chronic disease (Table 2). This finding  
17 needs further research for corroboration and possible explanations.

18  
19  
20 People with a self-reported history of COVID-19 related symptoms, contact with a known COVID-19  
21 case, or a positive COVID-19 RT-PCR had a higher seroprevalence as compared to their complement.  
22 Among seropositive individuals, only 10.2% reported being symptomatic. The percentage of  
23 asymptomatic infections, thus, was 90%. However, only 49% of individuals with a history of COVID-19  
24 like symptoms were tested using RT-PCR. We also estimated that only one out of almost 59 infections  
25 gets reported. This reflects the necessity of improving the efficiency of RT-PCR testing so that more  
26 symptomatic individuals receive the test. Not all individuals with a known RT-PCR positive result showed  
27 the presence of IgG antibodies. Around 20% of RT-PCR positive individuals were seronegative and in a  
28 large majority of them (32 out of 36) the duration since RT-PCR positivity was more than two weeks. This  
29 may be attributed to a poor B cell response or a false negative antibody test.[35] Around 38% of RT-PCR  
30 negative individuals were seropositive suggesting a false-negative RT-PCR or infection acquisition at a  
31 date later than the RT-PCR test.

32  
33  
34  
35 We estimated an infection fatality rate of 0.034% (95% CI 0.032 – 0.037). The infection fatality rate in  
36 SARS-CoV-2 infection has been reported to range from as low as 0.00% to 1.63%.[36] Our estimates of  
37 the infection fatality rate are low as compared to estimates from several Indian studies.[5,28,37] Under-  
38 reporting of COVID-19 deaths because of non-uniform definition for a 'COVID-19 death' may falsely  
39 lower the infection fatality rates.[38] Many other factors can influence the infection fatality rate in SARS-  
40 CoV-2 infection – the quality of available health facilities, the age structure of the population, and  
41 COVID-19 epidemic intensity.[39,40] Developing countries usually have a younger population as  
42 compared to the developed countries and Kashmir is not an exception. However, because of the  
43 possibility of under-reporting of COVID-19 deaths, the true infection fatality rate in Kashmir may be  
44 higher than our estimates. The infection fatality rate is, however, known to be lower in developing  
45 nations.[30,41] In developed nations like the United States and many European countries, a higher  
46 infection fatality rate has been reported.[30,42]

## 50 51 **Limitations**

52 One important limitation of our study is that even though we adjusted the weighted seroprevalence  
53 estimates for test performance using manufacturer-provided sensitivity and specificity (100% and  
54 99.63% respectively), we did not quantify the test validity in-house. Another limitation of our study  
55

1  
2  
3 estimates is that we excluded people <18 years of age. The results of our study may not thus be  
4 generalizable to this group of the population.  
5

6 Our estimated seroprevalence was much higher than we anticipated at the designing stage. This has  
7 impacted the precision of our estimates to some extent. However, we believe we still have been able to  
8 estimate the seroprevalence with reasonable precision.  
9

10 Lack of reliable death counts is another potential limitation. This may have led to an underestimation of  
11 the infection fatality rate. We did not perform any adjustment for death counts. Further, because of lack  
12 of age- and gender-specific mortality data we could not estimate age- and gender-specific infection  
13 fatality rates.  
14  
15

## 16 **CONCLUSIONS**

17  
18 We conclude that nearly 37% of individuals aged 18 years and above were infected with SARS-CoV-2 in  
19 Kashmir by October 2020. The infection fatality rate in the valley is around 0.034%. A majority of cases  
20 go unreported. For every reported case there are 59 unreported infections in the population. Since  
21 almost half of the symptomatic individuals go unreported, testing of symptomatic individuals and  
22 effective contact tracing needs to continue. Given the emergence of mutant Variants of Concern,  
23 increasing the population immunity through augmented and sustained vaccination is needed. We  
24 further recommend that adherence to COVID-19 prevention measures should be ensured at least till a  
25 large proportion of the population gets vaccinated.  
26  
27

## 28 **ACKNOWLEDGMENTS**

29  
30 We thank Prof. Samia Rashid for her support. We acknowledge the help from Divisional COVID-19  
31 Control Room Kashmir, especially from Dr. Rauf Hussain Rather. We thank the following coordinating  
32 center teams and the laboratory support team for their support and coordination:  
33

34 Coordinating center teams: Dr. Sabira Aalia Dkhar, Dr. Kouser Sideeq, Dr. Uruj Qureshi, Dr. Mehraj u Din  
35 Sofi, Dr. Yasmin Kango, Dr. Suhail Manzoor Shah, Dr. Bashir Ahmad Khan, Dr. Nabeel Ishtiyag, Dr.  
36 Tajamul Hussain Khan, Dr. Lahoot Hassan Khan, Dr. Muzaffer Ahmad, Dr. Ramesh Kumar Malla, Dr.  
37 Ruqaya Rasool Kapta, Dr. Mohammad Yousuf Naikoo, Dr. Khalid Abbass, Dr. Zarar Ahmad Bhat, Dr.  
38 Sumair Rashid, Dr. Zubair Ahmad, Dr. Shalender Singh Bali, Dr. Abdul Rouf, Dr. Abdul Hamid, Dr. Khalid  
39 Bashir, Dr. Qazi Najeeb Ahmad, Dr. Syed Irtiza, Dr. P Sharik Shaheen Khaki, Dr. Sheikh Mohammad Shafi,  
40 Dr. Mohammad Yousuf Zagoo, Dr. Mukhtar Ahmad Shah, Dr. Imtiyaz-ur-Rehman Bhat, Dr. Showkat  
41 Parray, Dr. Fazil Ali Kochak, Dr. Muzaffar Ahmad Zargar, Dr. Abdul Rashid Shah, Dr. Shagufta Saleem, Dr.  
42 Abdul Gani, Dr. Nighat Nasreen, Dr. Asima Nazeer, Dr. Zahoor Ahmad Lone.  
43  
44  
45

46 Laboratory support team: Ishtiyag Ahmad Handoo, Rahiba Makhdoomi, Iyman Wani, Romana Rasool,  
47 Asiya Rehman, Insha Rehman, Zahoor Ahmad, Gulzar Ahmad Wani, Javid Ahmad Bhat, M Saleem Malik,  
48 Naveed Manzoor, Mubeena.  
49

## 50 **COMPETING INTERESTS**

51  
52 We declare no competing interests, financial or otherwise.  
53

## 54 **FUNDING**

55  
56  
57  
58 12  
59

1  
2  
3 The National Health Mission Jammu & Kashmir funded the study. The funding agency was not involved  
4 in study designing, implementation, analysis, or interpretation of the study findings.  
5

#### 6 **CONTRIBUTORS**

7  
8 S Muhammad Salim Khan: Conceptualization, Funding acquisition, Methodology, Writing-review &  
9 editing.  
10

11 Mariya Amin Qurieshi, Inaamul Haq, Sabhiya Majid: Formal analysis, Data curation, Methodology,  
12 Project administration, Writing-original draft, Writing-review & editing.  
13

14 Javid Ahmad, Taha Ayub, Anjum Bashir, Ashfaq Ahmad Bhat, Abdul Majeed Ganai, Yasmeen Jan, Rauf-  
15 ur-Rashid Kaul, Zahid Ali Khan, Muneer Ahmad Masoodi, Beenish Mushtaq, Fouzia Nazir, Muzamil Nazir,  
16 Malik Waseem Raja, Mahbooba Rasool: Project administration, Supervision, Investigation, Writing-  
17 review & editing.  
18

19 Anjum Asma, Munazza Aziz, Shifana Ayoub, Arif Akbar Bhat, Iqra Nisar Chowdri, Shaista Ismail, Misbah  
20 Ferooz Kawoosa, Mehvish Afzal Khan, Mosin Saleem Khan, Rafiya Kousar, Ab Aziz Lone, Shahroz Nabi,  
21 Mohammad Obaid, Tanzeela Bashir Qazi, Iram Sabah, Ishtiyahq Ahmad Sumji: Supervision, Investigation,  
22 Writing-review & editing.  
23

24 S Muhammad Salim Khan, Mariya Amin Qurieshi, Inaamul Haq, and Sabhiya Majid have verified the  
25 underlying data.  
26  
27

#### 28 **DATA SHARING**

29  
30 Anonymized data collected for the study, including individual participant data and a data dictionary  
31 defining each field in the set, will be made available to interested researchers on request by Inaamul  
32 Haq ([haqinaam@yahoo.co.in](mailto:haqinaam@yahoo.co.in)) for two years from publication. The study protocol, statistical analysis  
33 plan, and informed consent forms are also available from Inaamul Haq.  
34  
35  
36  
37  
38  
39  
40  
41  
42  
43  
44  
45  
46  
47  
48  
49  
50  
51  
52  
53  
54  
55  
56  
57

## REFERENCES

- 1 Timeline of WHO's response to COVID-19. <https://www.who.int/emergencies/diseases/novel-coronavirus-2019/interactive-timeline#!> (accessed 26 Mar 2021).
- 2 Saleem S, Quansar R, Qurieshi M. COVID-19: Preparedness and response by union territory of Jammu and Kashmir for containment of pandemic. *Curr Med Issues* 2020;**18**:206. doi:10.4103/cmi.cmi\_56\_20
- 3 Peirlinck M, Linka K, Sahli Costabal F, *et al.* Visualizing the invisible: The effect of asymptomatic transmission on the outbreak dynamics of COVID-19. *Comput Methods Appl Mech Eng* 2020;**372**. doi:10.1016/j.cma.2020.113410
- 4 Borges LP, Martins AF, de Melo MS, *et al.* Seroprevalence of SARS-CoV-2 IgM and IgG antibodies in an asymptomatic population in Sergipe, Brazil. *Rev Panam Salud Publica/Pan Am J Public Heal* 2020;**44**:e108. doi:10.26633/RPSP.2020.108
- 5 Malani A, Shah D, Kang G, *et al.* Seroprevalence of SARS-CoV-2 in slums versus non-slums in Mumbai, India. *Lancet Glob. Heal.* 2021;**9**:e110–1. doi:10.1016/S2214-109X(20)30467-8
- 6 Capai L, Ayhan N, Masse S, *et al.* Seroprevalence of SARS-CoV-2 IgG Antibodies in Corsica (France), April and June 2020. *J Clin Med* 2020;**9**:3569. doi:10.3390/jcm9113569
- 7 Mahajan S, Srinivasan R, Redlich CA, *et al.* Seroprevalence of SARS-CoV-2-Specific IgG Antibodies Among Adults Living in Connecticut: Post-Infection Prevalence (PIP) Study. *Am J Med* 2021;**134**:526-534.e11. doi:10.1016/j.amjmed.2020.09.024
- 8 Goldstein E, Lipsitch M, Cevik M. On the Effect of Age on the Transmission of SARS-CoV-2 in Households, Schools, and the Community. *J Infect Dis* 2021;**223**:362–9. doi:10.1093/infdis/jiaa691
- 9 Pan Y, Li X, Yang G, *et al.* Seroprevalence of SARS-CoV-2 immunoglobulin antibodies in Wuhan, China: part of the city-wide massive testing campaign. *Clin Microbiol Infect* 2021;**27**:253–7. doi:10.1016/j.cmi.2020.09.044
- 10 Pagani G, Conti F, Giacomelli A, *et al.* Seroprevalence of SARS-CoV-2 significantly varies with age: Preliminary results from a mass population screening. *J. Infect.* 2020;**81**:e10–2. doi:10.1016/j.jinf.2020.09.021
- 11 Vena A, Berruti M, Adessi A, *et al.* Prevalence of Antibodies to SARS-CoV-2 in Italian Adults and Associated Risk Factors. *J Clin Med* 2020;**9**:2780. doi:10.3390/jcm9092780
- 12 Gudbjartsson DF, Norddahl GL, Melsted P, *et al.* Humoral Immune Response to SARS-CoV-2 in Iceland. *N Engl J Med* 2020;**383**:1724–34. doi:10.1056/nejmoa2026116
- 13 Pollán M, Pérez-Gómez B, Pastor-Barriuso R, *et al.* Prevalence of SARS-CoV-2 in Spain (ENE-COVID): a nationwide, population-based seroepidemiological study. *Lancet* 2020;**396**:535–44. doi:10.1016/S0140-6736(20)31483-5
- 14 Stringhini S, Wisniak A, Piumatti G, *et al.* Seroprevalence of anti-SARS-CoV-2 IgG antibodies in Geneva, Switzerland (SEROCoV-POP): a population-based study. *Lancet* 2020;**396**:313–9. doi:10.1016/S0140-6736(20)31304-0
- 15 Clapham H, Hay J, Routledge I, *et al.* Seroepidemiologic study designs for determining SARS-COV-

14

- 2 transmission and immunity. *Emerg. Infect. Dis.* 2020;**26**:1978–86. doi:10.3201/eid2609.201840
- 16 Khan SMS, Qurieshi MA, Haq I, *et al.* Seroprevalence of SARS-CoV-2 specific IgG antibodies in District Srinagar, northern India – A cross-sectional study. *PLoS One* 2020;**15**:e0239303. doi:10.1371/journal.pone.0239303
- 17 OpenEpi - Toolkit Shell for Developing New Applications. <http://www.openepi.com/SampleSize/SSPropor.htm> (accessed 5 Jul 2021).
- 18 Census of India Website : Office of the Registrar General & Census Commissioner, India. <https://www.censusindia.gov.in/> (accessed 26 Mar 2021).
- 19 Epicollect5 - Free and easy-to-use mobile data-gathering platform. <https://five.epicollect.net/> (accessed 26 Mar 2021).
- 20 SARS-CoV-2 Immunoassay | Abbott Core Laboratory. <https://www.corelaboratory.abbott/us/en/offerings/segments/infectious-disease/sars-cov-2> (accessed 26 Mar 2021).
- 21 Brown LD, Cai TT, Das Gupta A. Interval estimation for a binomial proportion. *Stat Sci* 2001;**16**:101–17. doi:10.1214/ss/1009213286
- 22 Census of India Website : Office of the Registrar General & Census Commissioner, India. [https://censusindia.gov.in/vital\\_statistics/SRS\\_Bulletins/Bulletins.html](https://censusindia.gov.in/vital_statistics/SRS_Bulletins/Bulletins.html) (accessed 26 Mar 2021).
- 23 Sempos CT, Tian L. Adjusting Coronavirus Prevalence Estimates for Laboratory Test Kit Error. *Am J Epidemiol* 2021;**190**:109–15. doi:10.1093/aje/kwaa174
- 24 Bendavid E, Mulaney B, Sood N, *et al.* COVID-19 antibody seroprevalence in Santa Clara County, California. *Int J Epidemiol* 2021;**50**:410–9. doi:10.1093/ije/dyab010
- 25 Bryan A, Pepper G, Wener MH, *et al.* Performance characteristics of the abbott architect sars-cov-2 igg assay and seroprevalence in Boise, Idaho. *J Clin Microbiol* 2020;**58**:e00941-20. doi:10.1128/JCM.00941-20
- 26 Elzein F, Ibrahim A, Alshahrani F, *et al.* Reinfection, recurrence, or delayed presentation of COVID-19? Case series and review of the literature. *J Infect Public Health* 2021;**14**:474–7. doi:10.1016/j.jiph.2021.01.002
- 27 Khan MS, Haq I, Qurieshi MA, *et al.* SARS-CoV-2 Seroprevalence Among Healthcare Workers by Workplace Exposure Risk in Kashmir, India. *J Hosp Med* 2021;**16**:274–81. doi:10.12788/jhm.3609
- 28 Murhekar M V., Bhatnagar T, Selvaraju S, *et al.* SARS-CoV-2 antibody seroprevalence in India, August–September, 2020: findings from the second nationwide household serosurvey. *Lancet Glob Heal* 2021;**9**:e257–66. doi:10.1016/S2214-109X(20)30544-1
- 29 Murhekar M V., Bhatnagar T, Thangaraj JWV, *et al.* SARS-CoV-2 seroprevalence among the general population and healthcare workers in India, December 2020–January 2021. *Int J Infect Dis* 2021;**108**:145–55. doi:10.1016/j.ijid.2021.05.040
- 30 O’Driscoll M, Ribeiro Dos Santos G, Wang L, *et al.* Age-specific mortality and immunity patterns of SARS-CoV-2. *Nature* 2021;**590**:140–5. doi:10.1038/s41586-020-2918-0
- 31 Kadambari S, Klenerman P, Pollard AJ. Why the elderly appear to be more severely affected by

- 1  
2  
3 COVID-19: The potential role of immunosenescence and CMV. *Rev. Med. Virol.* 2020;**30**:e2144.  
4 doi:10.1002/rmv.2144  
5
- 6 32 Pawelec G, Weng NP. Can an effective sars-cov-2 vaccine be developed for the older population?  
7 *Immun. Ageing.* 2020;**17**. doi:10.1186/s12979-020-00180-2  
8
- 9 33 Naranbhai V, Chang CC, Beltran WFG, *et al.* High seroprevalence of anti-SARS-CoV-2 antibodies in  
10 Chelsea, Massachusetts. *J Infect Dis* 2020;**222**:1955–9. doi:10.1093/infdis/jiaa579  
11
- 12 34 Yang J, Zheng Y, Gou X, *et al.* Prevalence of comorbidities and its effects in coronavirus disease  
13 2019 patients: A systematic review and meta-analysis. *Int J Infect Dis* 2020;**94**:91–5.  
14 doi:10.1016/j.ijid.2020.03.017  
15
- 16 35 Vabret N. Antibody responses to SARS-CoV-2 short-lived. *Nat Rev Immunol* 2020;**20**:519.  
17 doi:10.1038/s41577-020-0405-3  
18
- 19 36 Ioannidis JPA. Infection fatality rate of COVID-19 inferred from seroprevalence data. *Bull World*  
20 *Health Organ* 2021;**99**:19-33F. doi:10.2471/BLT.20.265892  
21
- 22 37 Murhekar M V., Bhatnagar T, Selvaraju S, *et al.* Prevalence of SARS-CoV-2 infection in India:  
23 Findings from the national serosurvey, May-June 2020. *Indian J Med Res* 2020;**152**:48–60.  
24 doi:10.4103/ijmr.IJMR\_3290\_20  
25
- 26 38 Pulla P. What counts as a covid-19 death? *BMJ* 2020;**370**:m2859. doi:10.1136/bmj.m2859  
27
- 28 39 Mahajan S, Caraballo C, Li S-X, *et al.* SARS-CoV-2 Infection Hospitalization Rate and Infection  
29 Fatality Rate Among the Non-Congregate Population in Connecticut. *Am J Med* 2021;**134**:812-  
30 816.e2. doi:10.1016/J.AMJMED.2021.01.020  
31
- 32 40 Kenyon C. COVID-19 Infection Fatality Rate Associated with Incidence-A Population-Level Analysis  
33 of 19 Spanish Autonomous Communities. *Biology (Basel)* 2020;**9**:1–4.  
34 doi:10.3390/BIOLOGY9060128  
35
- 36 41 Gu X, Mukherjee B, Das S, *et al.* COVID-19 prediction in South Africa: Understanding the  
37 unascertained cases - The hidden part of the epidemiological iceberg. medRxiv. 2020.  
38 doi:10.1101/2020.12.10.20247361  
39
- 40 42 McCulloh I, Kiernan K, Kent T. Inferring True COVID19 Infection Rates From Deaths. *Front Big*  
41 *Data* 2020;**3**. doi:10.3389/fdata.2020.565589  
42  
43  
44  
45

46 **Figure 1 legend:**

47  
48 Figure 1: Location of the ten districts and seroprevalence (%) by district. Figures in parentheses indicate  
49 a 95% Confidence Interval for seroprevalence.  
50

51 **Figure 2 legend:**

52  
53 Figure 2: Participant flow.  
54

55 **Figure 3 legend:**

56  
57  
58 16  
59

1  
2  
3 Figure 3: A. Seropositivity by the history of COVID-19 like symptoms, RT-PCR testing, and test result. B.  
4 History of COVID-19 like symptoms by seropositivity, RT-PCR testing, and test result.  
5

6 **Figure 4 legend:**  
7

8 Figure 4: A. Daily cases and deaths in Kashmir since the start of the COVID-19 pandemic; B. Cumulative  
9 number of cases and deaths in Kashmir.  
10

11 **Figure 5 legend:**  
12

13 Figure 5: Cumulative estimated SARS-CoV-2 infections, reported cases, and deaths in Kashmir, October-  
14 November 2020. The bars represent the number of persons at each step. The percentages above the  
15 bars represent the percentage out of the total population. The percentages within the triangles  
16 represent percentages out of the previous step who proceed to the next step.  
17  
18  
19  
20  
21  
22  
23  
24  
25  
26  
27  
28  
29  
30  
31  
32  
33  
34  
35  
36  
37  
38  
39  
40  
41  
42  
43  
44  
45  
46  
47  
48  
49  
50  
51  
52  
53  
54  
55  
56  
57

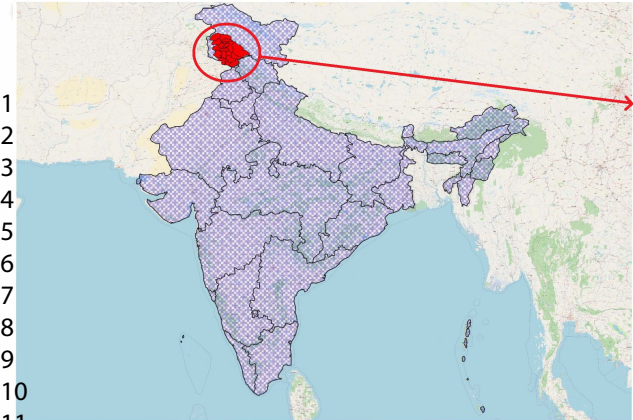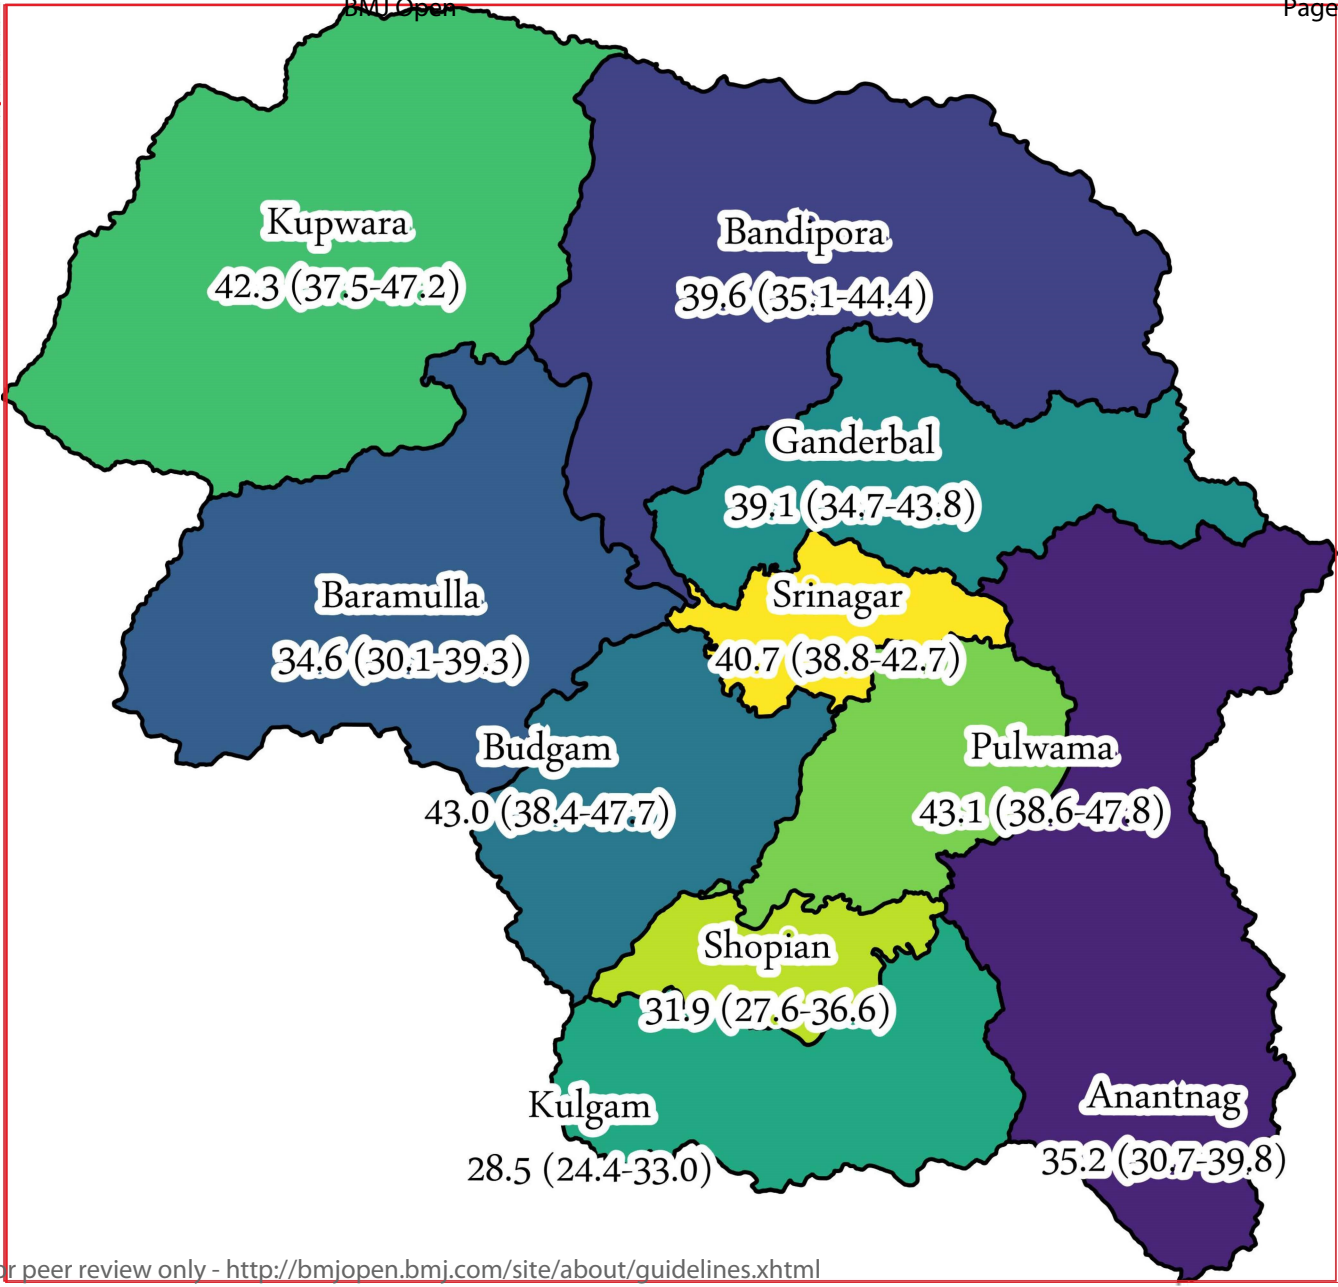

1  
2  
3  
4  
5  
6  
7  
8  
9  
10  
11  
12  
13  
14  
15  
16  
17  
18  
19  
20  
21  
22  
23  
24  
25  
26  
27  
28  
29  
30  
31  
32  
33  
34  
35  
36  
37  
38  
39  
40



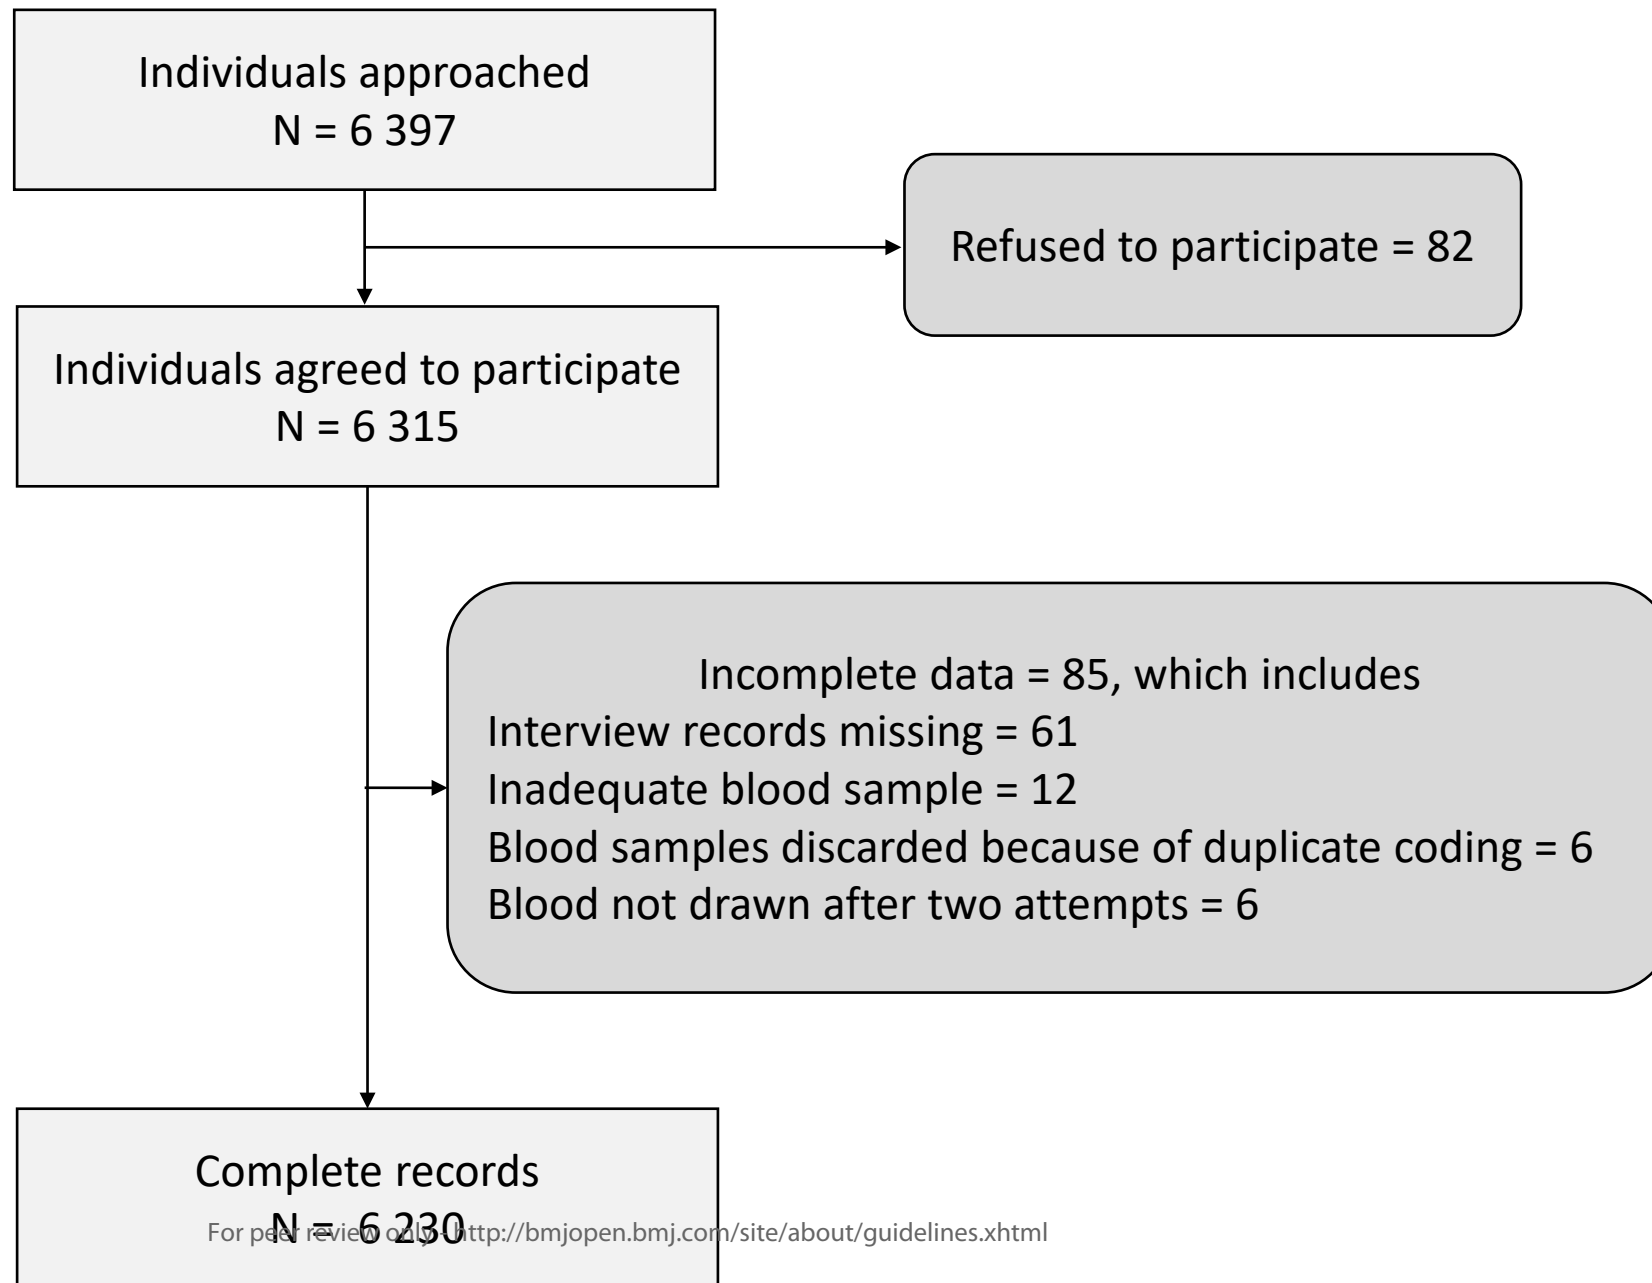

1  
2  
3  
4  
5  
6  
7  
8  
9  
10  
11  
12  
13  
14  
15  
16  
17  
18  
19  
20  
21  
22  
23  
24  
25  
26  
27  
28  
29  
30  
31  
32  
33  
34  
35  
36  
37  
38  
39  
40  
41

1  
2  
3  
4  
5  
6  
7  
8  
9  
10  
11  
12  
13  
14  
15  
16  
17  
18  
19  
20  
21  
22  
23  
24  
25  
26  
27  
28  
29  
30  
31  
32  
33  
34  
35  
36  
37  
38  
39  
40  
41  
42  
43  
44  
45  
46  
47  
48  
49  
50  
51  
52  
53  
54  
55  
56  
57  
58  
59  
60

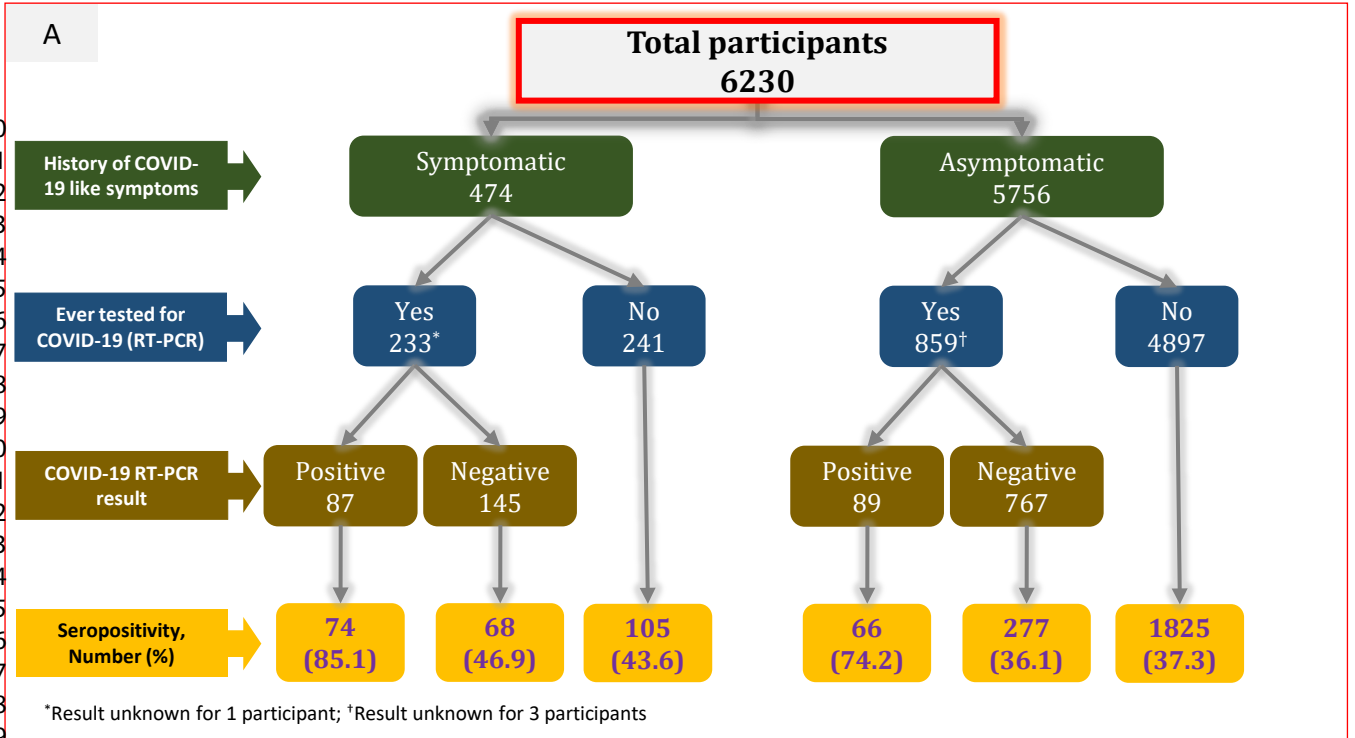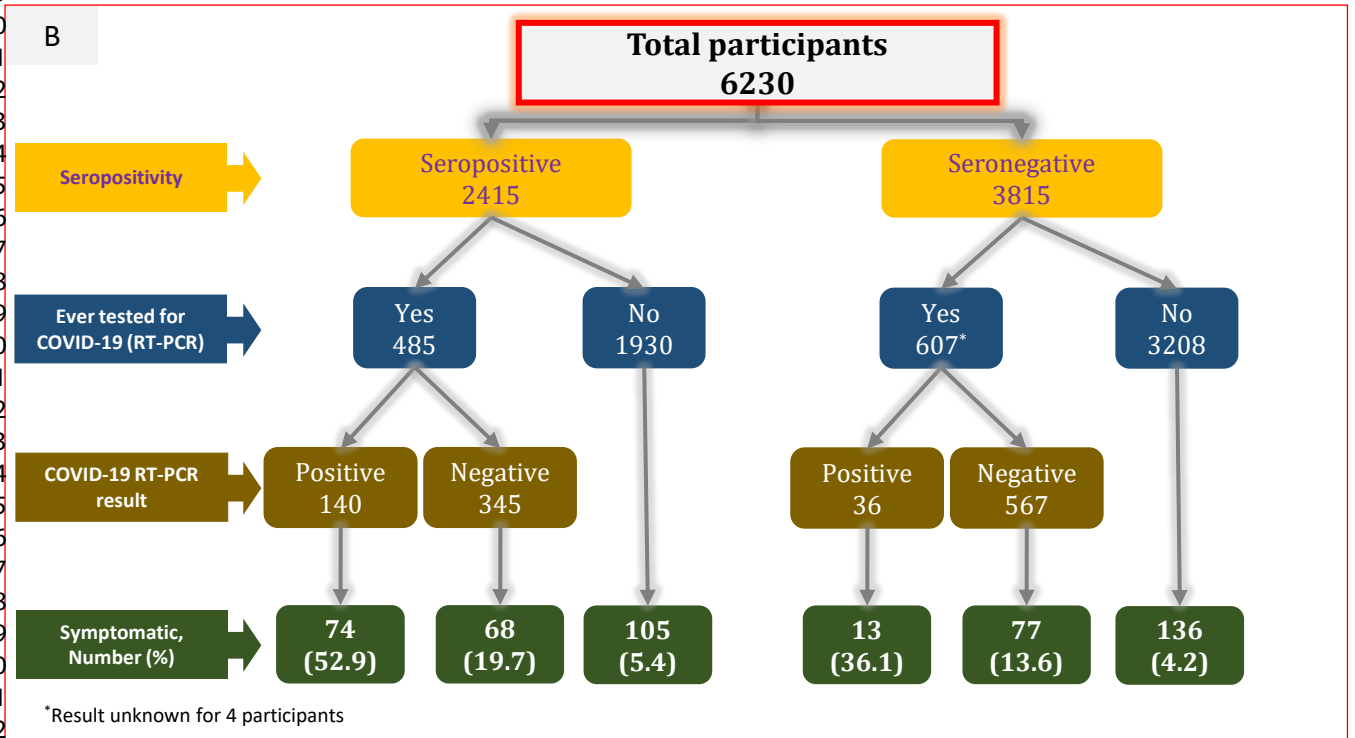

### BMJ Open

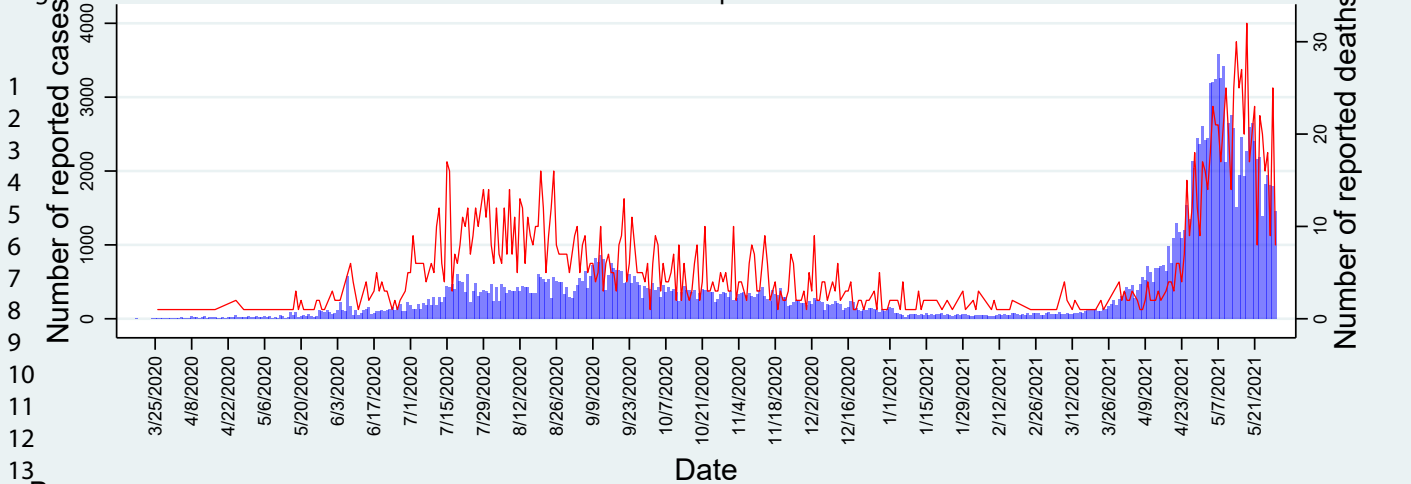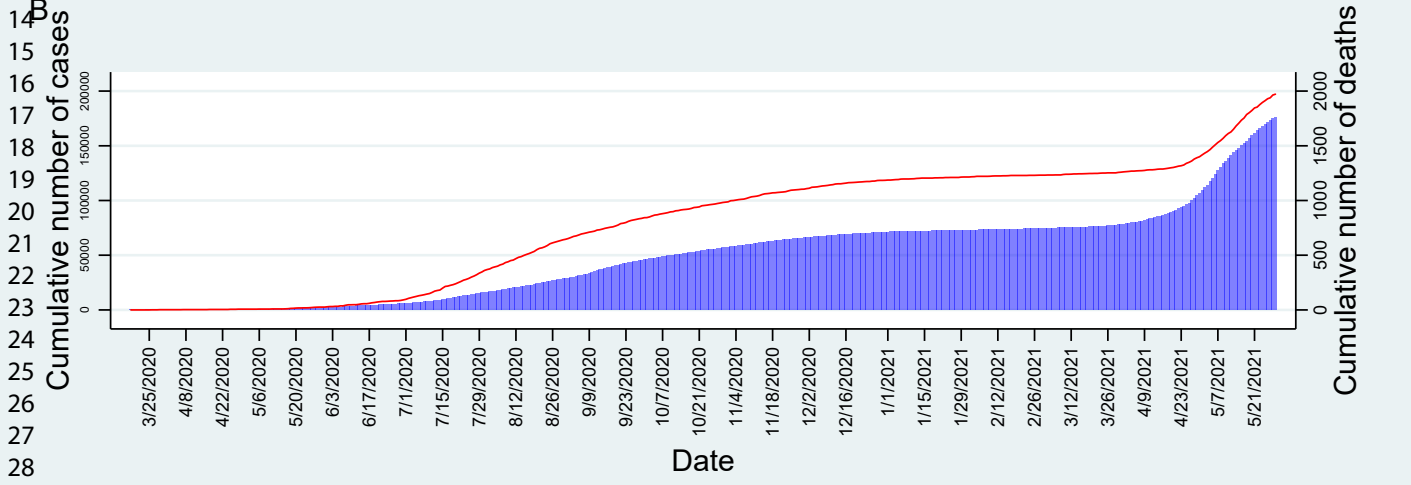

For peer review only - <http://open.bmj.com/site/defining/cases.html>

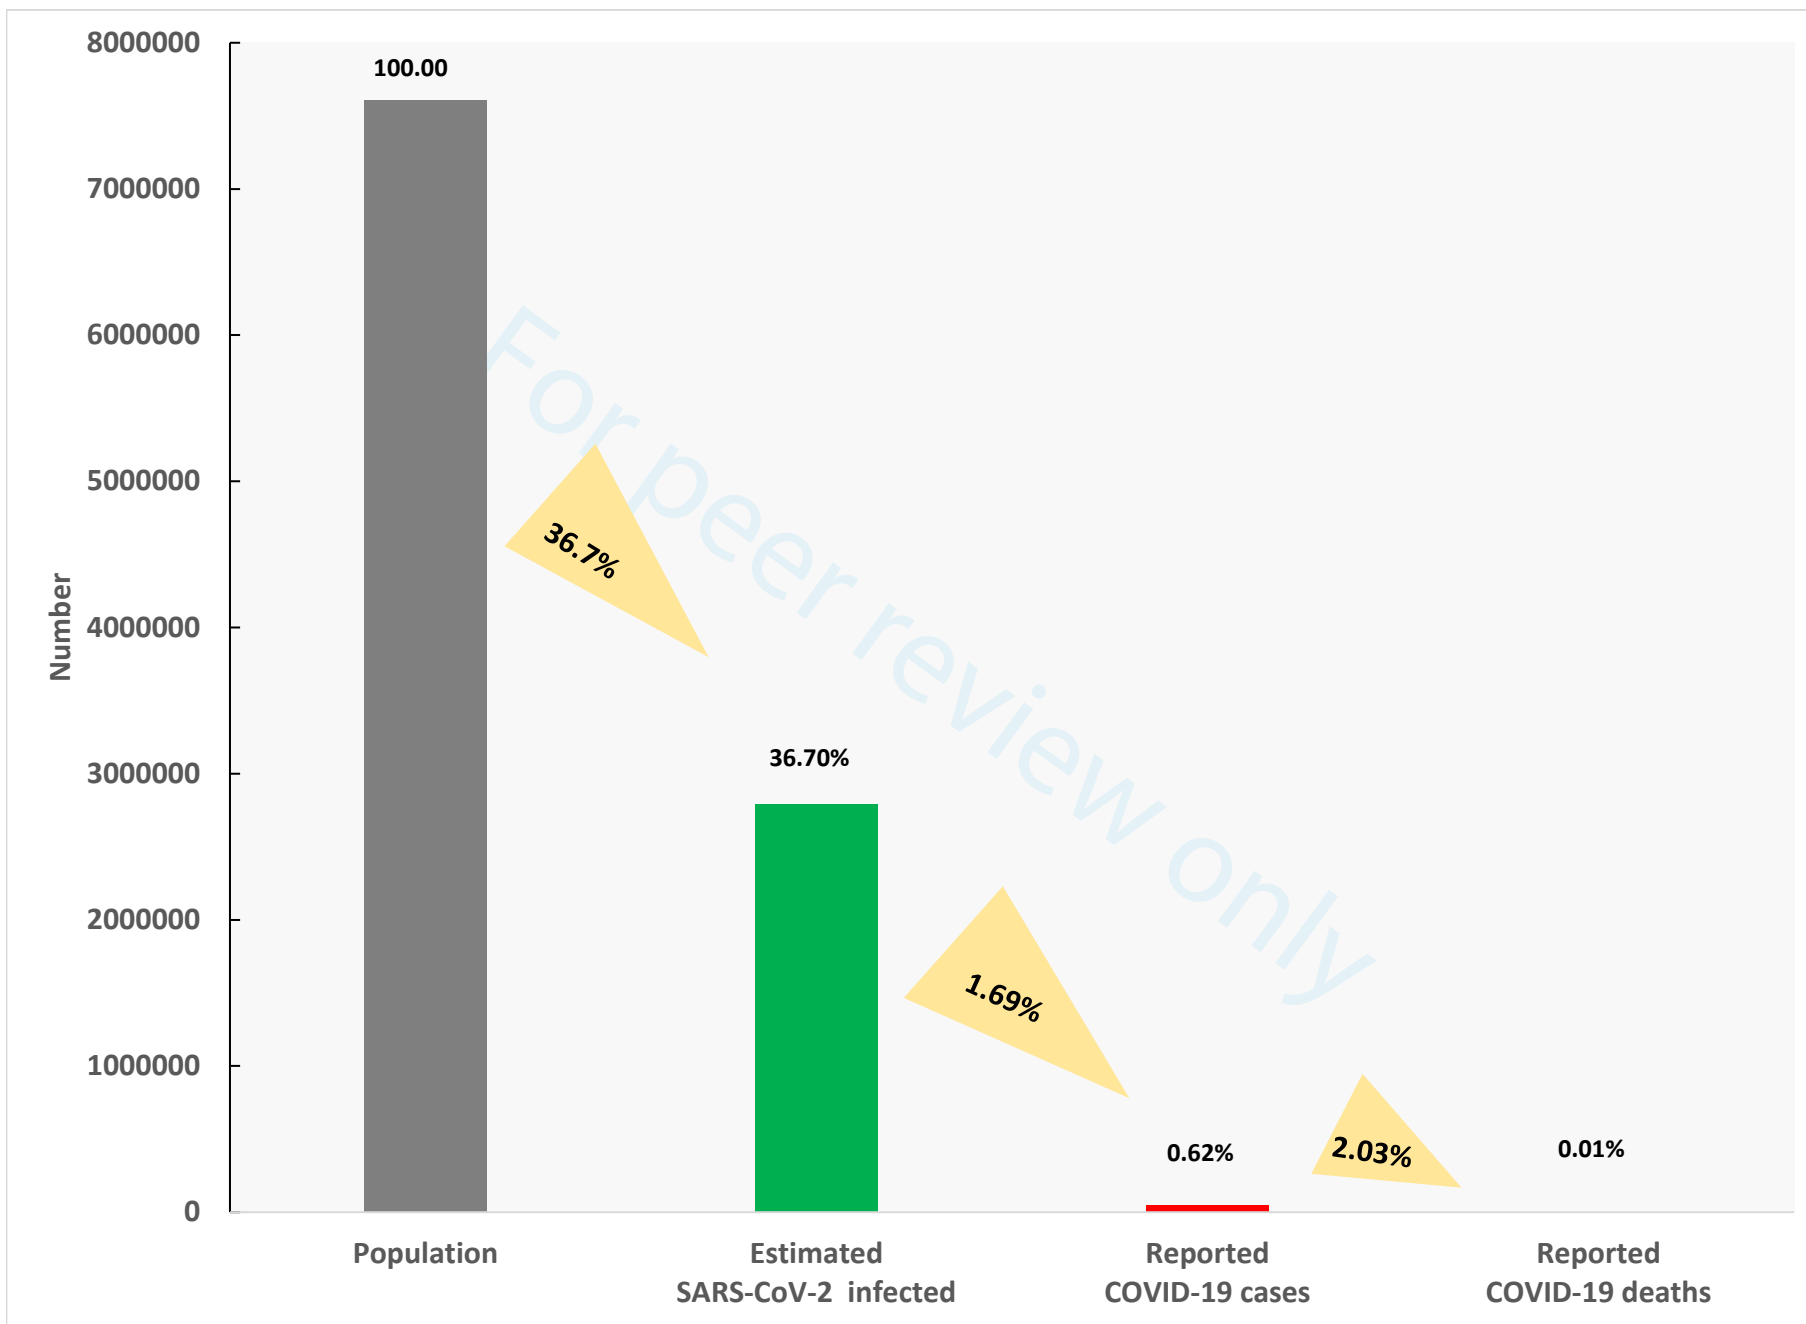

Supplemental Table 1: Participant characteristics by district

| District  | Total | Age (years) |       |       |     | Gender |      | Residence |       |
|-----------|-------|-------------|-------|-------|-----|--------|------|-----------|-------|
|           |       | <30         | 30-49 | 50-69 | 70+ | Female | Male | Rural     | Urban |
| Anantnag  | 421   | 84          | 197   | 113   | 27  | 214    | 207  | 295       | 126   |
| Budgam    | 442   | 113         | 190   | 105   | 34  | 263    | 179  | 354       | 88    |
| Bandipora | 424   | 106         | 174   | 114   | 30  | 227    | 197  | 341       | 83    |
| Baramulla | 405   | 113         | 176   | 98    | 18  | 214    | 191  | 325       | 80    |
| Ganderbal | 442   | 92          | 210   | 123   | 17  | 233    | 209  | 346       | 96    |
| Kulgam    | 428   | 102         | 194   | 113   | 19  | 257    | 171  | 346       | 82    |
| Kupwara   | 400   | 81          | 171   | 105   | 43  | 215    | 185  | 360       | 40    |
| Pulwama   | 443   | 102         | 176   | 126   | 39  | 218    | 225  | 396       | 47    |
| Shopiyan  | 407   | 119         | 152   | 90    | 46  | 211    | 196  | 368       | 39    |
| Srinagar  | 2418  | 601         | 1032  | 656   | 129 | 1052   | 1366 | 233       | 2185  |
| Total     | 6230  | 1513        | 2672  | 1643  | 402 | 3104   | 3126 | 3364      | 2866  |

Supplemental Table 2: Seroprevalence (unadjusted) by district and participant characteristics

| District  | Overall          | Age (years)      |                  |                  |                  | Gender           |                  | Residence        |                  |
|-----------|------------------|------------------|------------------|------------------|------------------|------------------|------------------|------------------|------------------|
|           |                  | <30              | 30-49            | 50-69            | 70+              | Male             | Female           | Urban            | Rural            |
| Anantnag  | 35.2 (30.7-39.8) | 29.8 (21-40.4)   | 34.5 (28.2-41.4) | 38.9 (30.4-48.2) | 40.7 (24.2-59.7) | 36.2 (30-43)     | 34.1 (28.1-40.7) | 42.9 (34.5-51.6) | 31.9 (26.8-37.4) |
| Budgam    | 43 (38.4-47.7)   | 44.2 (35.4-53.5) | 37.9 (31.3-45)   | 48.6 (39.2-58.1) | 50 (33.8-66.2)   | 41.9 (34.9-49.3) | 43.7 (37.8-49.8) | 38.6 (29.1-49.2) | 44.1 (39-49.3)   |
| Bandipora | 39.6 (35.1-44.4) | 37.7 (29-47.3)   | 42 (34.8-49.4)   | 40.4 (31.8-49.6) | 30 (16.4-48.3)   | 37.6 (31.1-44.5) | 41.4 (35.2-47.9) | 55.4 (44.6-65.7) | 35.8 (30.9-41)   |
| Baramulla | 34.6 (30.1-39.3) | 27.4 (20-36.4)   | 32.4 (25.9-39.6) | 44.9 (35.4-54.8) | 44.4 (24-67)     | 39.3 (32.6-46.4) | 30.4 (24.6-36.9) | 36.3 (26.5-47.3) | 34.2 (29.2-39.5) |
| Ganderbal | 39.1 (34.7-43.8) | 34.8 (25.8-45)   | 40.5 (34-47.3)   | 39.8 (31.6-48.7) | 41.2 (21-64.8)   | 39.2 (32.8-46)   | 39.1 (33-45.5)   | 42.7 (33.2-52.8) | 38.2 (33.2-43.4) |
| Kulgam    | 28.5 (24.4-33)   | 27.5 (19.7-36.9) | 26.8 (21-33.5)   | 31 (23.1-40.1)   | 36.8 (18.7-59.7) | 25.1 (19.2-32.2) | 30.7 (25.4-36.6) | 37.8 (28-48.7)   | 26.3 (21.9-31.2) |
| Kupwara   | 42.3 (37.5-47.2) | 33.3 (24-44.2)   | 39.8 (32.7-47.3) | 50.5 (41-59.9)   | 48.8 (34.4-63.4) | 41.6 (34.7-48.9) | 42.8 (36.3-49.5) | 50 (35-65)       | 41.4 (36.4-46.6) |
| Pulwama   | 43.1 (38.6-47.8) | 35.3 (26.7-45)   | 42.6 (35.5-50)   | 45.2 (36.8-54)   | 59 (43.2-73.1)   | 39.6 (33.4-46.1) | 46.8 (40.3-53.4) | 40.4 (27.5-54.9) | 43.4 (38.6-48.4) |
| Shopiyan  | 31.9 (27.6-36.6) | 28.6 (21.2-37.3) | 29.6 (22.9-37.3) | 41.1 (31.4-51.5) | 30.4 (18.9-45.1) | 31.1 (25-37.9)   | 32.7 (26.7-39.3) | 38.5 (24.7-54.4) | 31.3 (26.7-36.2) |
| Srinagar  | 40.7 (38.8-42.7) | 39.1 (35.3-43.1) | 39.2 (36.3-42.3) | 41.9 (38.2-45.7) | 53.5 (44.9-61.9) | 37.7 (35.2-40.3) | 44.6 (41.6-47.6) | 40.8 (38.7-42.9) | 39.9 (33.8-46.3) |

### Chronic disease and SARS-CoV-2 infection in the study population

Of the 6230 participants, 1145 reported a history of at least one chronic disease. Two hundred ninety-eight reported a history of more than one chronic disease.

#### Supplementary Table 3: Chronic disease in the study population

| Chronic disease (n = 1145)            | Number (%)  |
|---------------------------------------|-------------|
| Hypertension                          | 815 (13.1%) |
| Diabetes                              | 314 (5.0%)  |
| Chronic Obstructive Pulmonary Disease | 39 (0.6%)   |
| Coronary Heart Disease                | 35 (0.6%)   |
| Cerebrovascular Disease               | 16 (0.3%)   |
| Asthma                                | 15 (0.2%)   |
| Chronic Kidney Disease                | 10 (0.2%)   |
| Chronic Liver Disease                 | 5 (0.1%)    |
| Cancer                                | 4 (0.1%)    |

**Supplementary Table 4: History of COVID-19 like symptoms and seropositivity vis-à-vis history of chronic disease**

|                                                        |              | History of COVID-19 like symptoms |      |
|--------------------------------------------------------|--------------|-----------------------------------|------|
|                                                        |              | Yes                               | No   |
| Reported history of chronic disease (n=1145)           | Seropositive | 78                                | 417  |
|                                                        | Seronegative | 63                                | 587  |
| Did not report any history of chronic disease (n=5085) | Seropositive | 169                               | 1751 |
|                                                        | Seronegative | 164                               | 3001 |

Of the 1154 participants who reported a history of chronic disease 78 (6.8%) reported a history of COVID-19 like symptoms within three months of the interview date and were seropositive for SARS-CoV-2 specific IgG (symptomatic infection). The proportion of symptomatic infection among participants who did not report any history of chronic disease was 3.3% (169/5085).

STROBE Statement—Checklist of items that should be included in reports of *cross-sectional studies*

|                              | Item No | Recommendation                                                                                                                                                                                    | Page No              |
|------------------------------|---------|---------------------------------------------------------------------------------------------------------------------------------------------------------------------------------------------------|----------------------|
| <b>Title and abstract</b>    | 1       | (a) Indicate the study's design with a commonly used term in the title or the abstract                                                                                                            | 1, 3                 |
|                              |         | (b) Provide in the abstract an informative and balanced summary of what was done and what was found                                                                                               | 2                    |
| <b>Introduction</b>          |         |                                                                                                                                                                                                   |                      |
| Background/rationale         | 2       | Explain the scientific background and rationale for the investigation being reported                                                                                                              | 3                    |
| Objectives                   | 3       | State specific objectives, including any prespecified hypotheses                                                                                                                                  | 3                    |
| <b>Methods</b>               |         |                                                                                                                                                                                                   |                      |
| Study design                 | 4       | Present key elements of study design early in the paper                                                                                                                                           | 3                    |
| Setting                      | 5       | Describe the setting, locations, and relevant dates, including periods of recruitment, exposure, follow-up, and data collection                                                                   | 3 and Figure 1       |
| Participants                 | 6       | (a) Give the eligibility criteria, and the sources and methods of selection of participants                                                                                                       | 3, 4                 |
| Variables                    | 7       | Clearly define all outcomes, exposures, predictors, potential confounders, and effect modifiers. Give diagnostic criteria, if applicable                                                          | 4                    |
| Data sources/<br>measurement | 8*      | For each variable of interest, give sources of data and details of methods of assessment (measurement). Describe comparability of assessment methods if there is more than one group              | 4                    |
| Bias                         | 9       | Describe any efforts to address potential sources of bias                                                                                                                                         | 4, 5                 |
| Study size                   | 10      | Explain how the study size was arrived at                                                                                                                                                         | 3                    |
| Quantitative variables       | 11      | Explain how quantitative variables were handled in the analyses. If applicable, describe which groupings were chosen and why                                                                      | 4                    |
| Statistical methods          | 12      | (a) Describe all statistical methods, including those used to control for confounding                                                                                                             | 4, 5                 |
|                              |         | (b) Describe any methods used to examine subgroups and interactions                                                                                                                               | 5                    |
|                              |         | (c) Explain how missing data were addressed                                                                                                                                                       | 5                    |
|                              |         | (d) If applicable, describe analytical methods taking account of sampling strategy                                                                                                                | 4, 5                 |
|                              |         | (e) Describe any sensitivity analyses                                                                                                                                                             | 6, Table 3           |
| <b>Results</b>               |         |                                                                                                                                                                                                   |                      |
| Participants                 | 13*     | (a) Report numbers of individuals at each stage of study—eg numbers potentially eligible, examined for eligibility, confirmed eligible, included in the study, completing follow-up, and analysed | Figure 2, and page 5 |
|                              |         | (b) Give reasons for non-participation at each stage                                                                                                                                              | Figure 2             |
|                              |         | (c) Consider use of a flow diagram                                                                                                                                                                | Figure 2             |
| Descriptive data             | 14*     | (a) Give characteristics of study participants (eg demographic, clinical, social) and information on exposures and potential confounders                                                          | Table 1              |
|                              |         | (b) Indicate number of participants with missing data for each variable of interest                                                                                                               | Table 1, Figure 2    |
| Outcome data                 | 15*     | Report numbers of outcome events or summary measures                                                                                                                                              | Table 2              |



|    |                          |    |                                                                         |
|----|--------------------------|----|-------------------------------------------------------------------------|
| 1  |                          |    |                                                                         |
| 2  | Main results             | 16 | (a) Give unadjusted estimates and, if applicable, confounder-adjusted   |
| 3  |                          |    | estimates and their precision (eg, 95% confidence interval). Make       |
| 4  |                          |    | clear which confounders were adjusted for and why they were             |
| 5  |                          |    | included                                                                |
| 6  |                          |    |                                                                         |
| 7  |                          |    | (b) Report category boundaries when continuous variables were           |
| 8  |                          |    | categorized                                                             |
| 9  |                          |    |                                                                         |
| 10 |                          |    | (c) If relevant, consider translating estimates of relative risk into   |
| 11 |                          |    | absolute risk for a meaningful time period                              |
| 12 | Other analyses           | 17 | Report other analyses done—eg analyses of subgroups and                 |
| 13 |                          |    | interactions, and sensitivity analyses                                  |
| 14 |                          |    |                                                                         |
| 15 | <b>Discussion</b>        |    |                                                                         |
| 16 | Key results              | 18 | Summarise key results with reference to study objectives                |
| 17 |                          |    |                                                                         |
| 18 | Limitations              | 19 | Discuss limitations of the study, taking into account sources of        |
| 19 |                          |    | potential bias or imprecision. Discuss both direction and magnitude     |
| 20 |                          |    | of any potential bias                                                   |
| 21 | Interpretation           | 20 | Give a cautious overall interpretation of results considering           |
| 22 |                          |    | objectives, limitations, multiplicity of analyses, results from similar |
| 23 |                          |    | studies, and other relevant evidence                                    |
| 24 |                          |    |                                                                         |
| 25 | Generalisability         | 21 | Discuss the generalisability (external validity) of the study results   |
| 26 |                          |    |                                                                         |
| 27 | <b>Other information</b> |    |                                                                         |
| 28 | Funding                  | 22 | Give the source of funding and the role of the funders for the present  |
| 29 |                          |    | study and, if applicable, for the original study on which the present   |
| 30 |                          |    | article is based                                                        |
| 31 |                          |    |                                                                         |
| 32 |                          |    |                                                                         |

\*Give information separately for exposed and unexposed groups.

# BMJ Open

## Seroprevalence of SARS-CoV-2 specific IgG antibodies in Kashmir, India, seven months after the first reported local COVID-19 case: results of a population-based seroprevalence survey from October-November, 2020

|                               |                                                                                                                                                                                                                                                                                                                                                                                                                                                                                                                                                                                                                                                                                                                                                                                                                                                                                                                                                                                                                                                                                                                                                                                                                                                                                                                                                                                                                                                                                                                                                                                                                                                                                                                                                                                                                                                                           |
|-------------------------------|---------------------------------------------------------------------------------------------------------------------------------------------------------------------------------------------------------------------------------------------------------------------------------------------------------------------------------------------------------------------------------------------------------------------------------------------------------------------------------------------------------------------------------------------------------------------------------------------------------------------------------------------------------------------------------------------------------------------------------------------------------------------------------------------------------------------------------------------------------------------------------------------------------------------------------------------------------------------------------------------------------------------------------------------------------------------------------------------------------------------------------------------------------------------------------------------------------------------------------------------------------------------------------------------------------------------------------------------------------------------------------------------------------------------------------------------------------------------------------------------------------------------------------------------------------------------------------------------------------------------------------------------------------------------------------------------------------------------------------------------------------------------------------------------------------------------------------------------------------------------------|
| Journal:                      | <i>BMJ Open</i>                                                                                                                                                                                                                                                                                                                                                                                                                                                                                                                                                                                                                                                                                                                                                                                                                                                                                                                                                                                                                                                                                                                                                                                                                                                                                                                                                                                                                                                                                                                                                                                                                                                                                                                                                                                                                                                           |
| Manuscript ID                 | bmjopen-2021-053791.R3                                                                                                                                                                                                                                                                                                                                                                                                                                                                                                                                                                                                                                                                                                                                                                                                                                                                                                                                                                                                                                                                                                                                                                                                                                                                                                                                                                                                                                                                                                                                                                                                                                                                                                                                                                                                                                                    |
| Article Type:                 | Original research                                                                                                                                                                                                                                                                                                                                                                                                                                                                                                                                                                                                                                                                                                                                                                                                                                                                                                                                                                                                                                                                                                                                                                                                                                                                                                                                                                                                                                                                                                                                                                                                                                                                                                                                                                                                                                                         |
| Date Submitted by the Author: | 29-Aug-2021                                                                                                                                                                                                                                                                                                                                                                                                                                                                                                                                                                                                                                                                                                                                                                                                                                                                                                                                                                                                                                                                                                                                                                                                                                                                                                                                                                                                                                                                                                                                                                                                                                                                                                                                                                                                                                                               |
| Complete List of Authors:     | <p>Khan, S Muhammad; Government Medical College Srinagar, Community Medicine</p> <p>Qurieshi, Mariya; Government Medical College Srinagar, Community Medicine</p> <p>Haq, Inaamul; Government Medical College Srinagar, Community Medicine</p> <p>Majid, Sabhiya; Government Medical College Srinagar, Biochemistry</p> <p>Ahmad, Javid; Sher-i-Kashmir Institute of Medical Sciences, Community Medicine</p> <p>Ayub, Taha; Government Medical College Srinagar, Community Medicine</p> <p>Bhat, Ashfaq; SKIMS Medical College Srinagar, Community Medicine</p> <p>Fazili, Anjum; Sher-i-Kashmir Institute of Medical Sciences, Community Medicine</p> <p>Ganai, Abdul; Government Medical College Baramulla, Community Medicine</p> <p>Jan, Yasmeen; SKIMS Medical College Srinagar, Community Medicine</p> <p>Kaul, Rauf-ur-Rashid; Sher-i-Kashmir Institute of Medical Sciences, Community Medicine</p> <p>Khan, Zahid; Government Medical College Baramulla, Community Medicine</p> <p>Masoodi, Muneer; Government Medical College Anantnag, Community Medicine</p> <p>Mushtaq, Beenish; SKIMS Medical College Srinagar, Community Medicine</p> <p>Nazir, Fouzia; Government Medical College Anantnag, Community Medicine</p> <p>Nazir, Muzamil; Government Medical College Baramulla, Community Medicine</p> <p>Raja, Malik; Government Medical College Srinagar, Community Medicine</p> <p>Rasool, Mahbooba; Government Medical College Anantnag, Community Medicine</p> <p>Asma, Anjum; Government Medical College Srinagar, Community Medicine</p> <p>Ayoub, Shifana; Government Medical College Srinagar, Community Medicine</p> <p>Aziz, Munazza; Government of Jammu and Kashmir Directorate of Health Services</p> <p>Bhat, Arif; Government Medical College Srinagar, Biochemistry</p> <p>Chowdri, Iqra; Government Medical College Srinagar, Community</p> |

|                                    |                                                                                                                                                                                                                                                                                                                                                                                                                                                                                                                                                                                                                                                                                                                                                                                                                                                                     |
|------------------------------------|---------------------------------------------------------------------------------------------------------------------------------------------------------------------------------------------------------------------------------------------------------------------------------------------------------------------------------------------------------------------------------------------------------------------------------------------------------------------------------------------------------------------------------------------------------------------------------------------------------------------------------------------------------------------------------------------------------------------------------------------------------------------------------------------------------------------------------------------------------------------|
|                                    | Medicine<br>Ismail, Shaista; Government Medical College Srinagar, Community<br>Medicine<br>Kawoosa, Misbah; Government Medical College Srinagar, Community<br>Medicine<br>Khan, Mehvish; Government Medical College Srinagar, Community<br>Medicine<br>Khan, Mosin; Government Medical College Srinagar, Biochemistry<br>Kousar, Rafiya; Government Medical College Srinagar, Community<br>Medicine<br>Lone, Ab; Government Medical College Srinagar, Community Medicine<br>Nabi, Shahroz; Government Medical College Srinagar, Community<br>Medicine<br>Obaid, Mohammad; Government Medical College Srinagar, Biochemistry<br>Qazi, Tanzeela; Government Medical College Srinagar, Community<br>Medicine<br>Sabah, Iram; Government Medical College Srinagar, Community<br>Medicine<br>Sumji, Ishtiyag; Government Medical College Srinagar, Community<br>Medicine |
| <b>Primary Subject<br>Heading</b>: | Infectious diseases                                                                                                                                                                                                                                                                                                                                                                                                                                                                                                                                                                                                                                                                                                                                                                                                                                                 |
| Secondary Subject Heading:         | Epidemiology                                                                                                                                                                                                                                                                                                                                                                                                                                                                                                                                                                                                                                                                                                                                                                                                                                                        |
| Keywords:                          | COVID-19, EPIDEMIOLOGY, Epidemiology < INFECTIOUS DISEASES                                                                                                                                                                                                                                                                                                                                                                                                                                                                                                                                                                                                                                                                                                                                                                                                          |
|                                    |                                                                                                                                                                                                                                                                                                                                                                                                                                                                                                                                                                                                                                                                                                                                                                                                                                                                     |

SCHOLARONE™  
Manuscripts



I, the Submitting Author has the right to grant and does grant on behalf of all authors of the Work (as defined in the below author licence), an exclusive licence and/or a non-exclusive licence for contributions from authors who are: i) UK Crown employees; ii) where BMJ has agreed a CC-BY licence shall apply, and/or iii) in accordance with the terms applicable for US Federal Government officers or employees acting as part of their official duties; on a worldwide, perpetual, irrevocable, royalty-free basis to BMJ Publishing Group Ltd ("BMJ") its licensees and where the relevant Journal is co-owned by BMJ to the co-owners of the Journal, to publish the Work in this journal and any other BMJ products and to exploit all rights, as set out in our [licence](#).

The Submitting Author accepts and understands that any supply made under these terms is made by BMJ to the Submitting Author unless you are acting as an employee on behalf of your employer or a postgraduate student of an affiliated institution which is paying any applicable article publishing charge ("APC") for Open Access articles. Where the Submitting Author wishes to make the Work available on an Open Access basis (and intends to pay the relevant APC), the terms of reuse of such Open Access shall be governed by a Creative Commons licence – details of these licences and which [Creative Commons](#) licence will apply to this Work are set out in our licence referred to above.

Other than as permitted in any relevant BMJ Author's Self Archiving Policies, I confirm this Work has not been accepted for publication elsewhere, is not being considered for publication elsewhere and does not duplicate material already published. I confirm all authors consent to publication of this Work and authorise the granting of this licence.

1  
2  
3 **Seroprevalence of SARS-CoV-2 specific IgG antibodies in Kashmir, India, seven months after the first**  
4 **reported local COVID-19 case: results of a population-based seroprevalence survey from October-**  
5 **November, 2020**  
6

7 S Muhammad Salim Khan,<sup>1</sup> Mariya Amin Qurieshi,<sup>1</sup> Inaamul Haq,<sup>1</sup> Sabhiya Majid,<sup>2</sup> Javid Ahmad,<sup>3\*</sup> Taha  
8 Ayub,<sup>1\*</sup> Ashfaq Ahmad Bhat,<sup>4\*</sup> Anjum Bashir Fazili,<sup>3\*</sup> Abdul Majeed Ganai,<sup>5\*</sup> Yasmeen Jan,<sup>4\*</sup> Rauf-ur-  
9 Rashid Kaul,<sup>3\*</sup> Zahid Ali Khan,<sup>5\*</sup> Muneer Ahmad Masoodi,<sup>6\*</sup> Beenish Mushtaq,<sup>4\*</sup> Fouzia Nazir,<sup>6\*</sup> Muzamil  
10 Nazir,<sup>5\*</sup> Malik Waseem Raja,<sup>1\*</sup> Mahbooba Rasool,<sup>6\*</sup> Anjum Asma,<sup>1†</sup> Shifana Ayoub,<sup>1†</sup> Munazza Aziz,<sup>7†</sup> Arif  
11 Akbar Bhat,<sup>2†</sup> Iqra Nisar Chowdri,<sup>1†</sup> Shaista Ismail,<sup>1†</sup> Misbah Ferooz Kawoosa,<sup>1†</sup> Mehvish Afzal Khan,<sup>1†</sup>  
12 Mosin Saleem Khan,<sup>2†</sup> Rafiya Kousar,<sup>1†</sup> Ab Aziz Lone,<sup>1†</sup> Shahroz Nabi,<sup>1†</sup> Mohammad Obaid,<sup>1†</sup> Tanzeela  
13 Bashir Qazi,<sup>1†</sup> Iram Sabah,<sup>1†</sup> Ishtiyag Ahmad Sumji<sup>1†</sup>  
14

15  
16 \*Authors in alphabetical order, Contributed equally

17  
18 †Authors in alphabetical order, Contributed equally

19  
20 Corresponding author:

21  
22 Dr. Inaamul Haq, Department of Community Medicine, Government Medical College, Srinagar, Jammu &  
23 Kashmir, 190010, India. Email: [haqinaam@yahoo.co.in](mailto:haqinaam@yahoo.co.in)  
24

25 Affiliation

26  
27 <sup>1</sup> Department of Community Medicine, Government Medical College Srinagar, Jammu & Kashmir, India

28  
29 <sup>2</sup> Department of Biochemistry, Government Medical College Srinagar, Jammu & Kashmir, India

30  
31 <sup>3</sup> Department of Community Medicine, Sher-i-Kashmir Institute of Medical Sciences, Srinagar, Jammu &  
32 Kashmir, India

33  
34 <sup>4</sup> Department of Community Medicine, SKIMS Medical College, Srinagar, Jammu & Kashmir, India

35  
36 <sup>5</sup> Department of Community Medicine, Government Medical College Baramulla, Jammu & Kashmir, India

37  
38 <sup>6</sup> Department of Community Medicine, Government Medical College Anantnag, Jammu & Kashmir, India

39  
40 <sup>7</sup> Directorate of Health Services Kashmir, Government of Jammu & Kashmir, India

41  
42 Word Count: 3727 (excluding abstract, tables, and references)  
43  
44  
45  
46  
47  
48  
49  
50  
51  
52  
53  
54  
55  
56  
57  
58  
59  
60

## ABSTRACT

**Objectives:** We designed a population-based survey in Kashmir to estimate the seroprevalence of SARS-CoV-2 specific IgG antibodies in the general population aged 18 years and above.

**Setting:** The survey was conducted among 110 villages and urban wards across ten districts in Kashmir from 17 Oct 2020 to 04 Nov 2020.

**Participants:** Individuals aged 18 years and above were eligible to be included in the survey. Serum samples were tested for the presence of SARS-CoV-2 specific IgG antibodies using the Abbott SARS-CoV-2 IgG assay.

**Primary and secondary outcome measures:** We labeled assay results equal to or above the cut-off index value of 1.4 as positive for SARS-CoV-2 specific IgG antibodies. Seroprevalence estimates were adjusted for the sampling design and assay characteristics.

**Results:** Out of 6397 eligible individuals enumerated, 6315 (98.7%) agreed to participate. The final analysis was done on 6230 participants. Seroprevalence adjusted for the sampling design and assay characteristics was 36.7% (95% CI 34.3%-39.2%). Seroprevalence was higher among the older population. Among seropositive individuals, 10.2% (247/2415) reported a history of COVID-19 like symptoms. Out of 474 symptomatic individuals, 233 (49.2%) reported having been tested. We estimated an infection fatality rate of 0.034%.

**Conclusions:** During the first seven months of the COVID-19 epidemic in Kashmir valley, approximately 37% of individuals were infected. The reported number of COVID-19 cases was only a small fraction of the estimated number of infections. A more efficient surveillance system with strengthened reporting of COVID-19 cases and deaths is warranted.

## ARTICLE SUMMARY

### Strengths and limitations of this study

- The findings of our study are based on a representative sample of the population.
- The laboratory test used for the detection of SARS-CoV-2 specific IgG antibodies in serum samples provides valid results.
- We report seroprevalence estimates adjusted for sampling design and test performance.
- Even though we adjusted the weighted seroprevalence estimates for test performance using manufacturer-provided sensitivity and specificity (100% and 99.63%, respectively), we did not quantify the test validity in-house.
- Because of lack of age- and gender-specific mortality data, we could not estimate age- and gender-specific infection fatality rates.

## INTRODUCTION

On 11 Feb 2020, the World Health Organization announced that the disease caused by the Severe Acute Respiratory Syndrome Coronavirus 2 (SARS-CoV-2) would be named coronavirus disease (COVID-19).[1] In Kashmir, the first case of COVID-19 was confirmed in Srinagar city on 18 Mar 2020.[2] The government imposed the first phase of the lockdown in Kashmir on 24 March 2020. During this phase, inter-state travel remained suspended. People were barred from moving outside except in an

1  
2  
3 emergency. Except for essential services, all government and private offices were advised to work from  
4 home. Universal masking was made mandatory. The lockdown was extended till 31 May 2020 and later  
5 relaxed in a phased manner.  
6

7 Mild or asymptomatic infections are common in Coronavirus disease 2019 (COVID-19) and are an  
8 important source of infection transmission.[3,4] Such cases are less likely to be detected by a  
9 surveillance system based on reverse-transcriptase polymerase chain reaction (RT-PCR) testing.  
10 Therefore, the number of reported RT-PCR positive cases are an underestimate of the true number of  
11 infections in a population.  
12  
13

14 Seroprevalence surveys have been conducted in various countries at different stages of the current  
15 epidemic among various population groups.[5–14] Seroprevalence surveys provide a more accurate  
16 estimate of past infection, improve understanding of the infection transmission dynamics, and guide  
17 public health response.[15]  
18

19 We designed this survey with the primary objective to estimate the seroprevalence of severe acute  
20 respiratory syndrome coronavirus 2 (SARS-CoV-2) specific IgG antibodies in the adult population of  
21 Kashmir valley.  
22  
23

## 24 **METHODS**

25  
26 We designed a population-based cross-sectional study. The study covered all the ten districts of  
27 Kashmir, a valley in northern India. (Figure 1) We completed data collection in three weeks, from 17 Oct  
28 2020 to 04 Nov 2020.  
29

### 30 **Ethics**

31  
32 We obtained written informed consent from all study participants. The study was approved by the  
33 Institutional Ethics Committee of Government Medical College Srinagar (reference number:  
34 1004/ETH/GMC). We used anonymized participant data for analysis.  
35

### 36 **Sample size**

37  
38 Based on the results of a previous study conducted in July 2020, we speculated that, by October 2020,  
39 the prevalence would have increased to around 20%.[16] We calculated the minimum sample size based  
40 on an anticipated seroprevalence of 20%, an absolute precision of 2%, and a design effect of 2. We used  
41 OpenEpi to make sample size calculations.[17] We adjusted the sample size for a possible non-response  
42 of 10% to obtain a minimum size of 3376. We decided to select 3600 individuals from nine of the ten  
43 districts (except district Srinagar). To obtain precise estimates for district Srinagar, sample size  
44 estimation was made for the district separately. We used a design effect of 1.5, an anticipated  
45 seroprevalence of 20%, and absolute precision of 2% to obtain a sample size of 2302 for the district,  
46 further increasing to 2400 to account for non-response. We thus targeted a total sample size of 6000  
47 (3600 + 2400).  
48  
49  
50

### 51 **Participants**

52  
53 All adults  $\geq 18$  years of age were eligible to participate in the study. We selected eligible participants  
54 using a three-stage stratified cluster sampling technique. We listed all clusters in the valley using the  
55 Census 2011 data.[18] Within each of the ten districts in the valley, clusters were stratified into urban  
56  
57

1  
2  
3 and rural clusters. We selected clusters within each of the 20 strata by probability proportionate to size  
4 (PPS) sampling. Except for district Srinagar which we oversampled to obtain precise seroprevalence  
5 estimates for, ten clusters were randomly selected from each district. We selected 20 clusters from  
6 district Srinagar. We divided each selected cluster into four equal areas and chose a central location  
7 within each of the four areas as the starting point. Thereafter, we approached consecutive households  
8 to enroll at least ten eligible participants. We thus identified a total of 440 random locations within 110  
9 clusters in ten districts. We invited all eligible adults in a household for participation.  
10  
11

## 12 **Variables**

13  
14 The primary outcome variable of interest was SARS-CoV-2 specific IgG antibodies. In addition, we  
15 obtained information from participants about their age, gender, history of COVID-19 like symptoms in  
16 the three months before the interview date, history of contact with a known COVID-19 patient, and  
17 history of COVID-19 testing.  
18  
19

## 20 **Procedure**

21 We informed eligible adults about the purpose and the procedure of the study. Study participation was  
22 voluntary. Participants were interviewed by health personnel specifically trained for the interview.  
23 Interview responses were recorded in an Epicollect5 form.[19] Once the interview was completed, a  
24 trained phlebotomist collected 3-5 mL of venous blood from the antecubital vein under aseptic  
25 precautions into a red-top collection tube containing a clot activator. The tube was left standing,  
26 undisturbed, for at least 30 minutes for clot formation. The sample was later transported to a central  
27 facility for centrifugation. Centrifuged samples were transported to a central laboratory for further  
28 processing and analysis. Serum samples were tested for the presence of SARS-CoV-2 specific IgG  
29 antibodies using the Abbott SARS-CoV-2 IgG assay. The assay uses chemiluminescence to detect IgG  
30 antibodies against the SARS-CoV-2 nucleocapsid protein. The reported sensitivity and specificity of the  
31 assay are 100% (95% CI 95.89-100.00) and 99.63% (99.05-99.90), respectively.[20] As recommended by  
32 the manufacturer, we labeled assay results equal to or above the cut-off index value of 1.4 as positive  
33 for SARS-CoV-2 specific IgG antibodies.  
34  
35  
36  
37

## 38 **Statistical methods**

39 We report unweighted seroprevalence estimates in percentages. We used the Agresti-Coull procedure  
40 to calculate a 95% confidence interval (CI) for seroprevalence estimates.[21] A weighted estimate of  
41 seroprevalence is provided. To calculate survey weights (inverse of sampling probability), we used the  
42 estimated population of the districts. We used the census 2011 data and growth rates from Sample  
43 Registration System to estimate the population of the districts in 2020.[18,22] Survey weights obtained  
44 were further adjusted for non-response and age and sex structure (post-stratification weights). We  
45 further adjusted the weighted seroprevalence estimates for test performance to calculate “weighted  
46 seroprevalence adjusted for test performance”. We did this using the formula:  
47  
48

49 *Weighted seroprevalence adjusted for test performance* =  
50  $(\text{Weighted seroprevalence} + \text{Test specificity} - 1) / (\text{Test sensitivity} + \text{Test specificity} - 1)$ . [23]  
51

52 We used the manufacturer-provided sensitivity and specificity in the above formula.[20] We used the  
53 extremes of the manufacturer-provided 95% CI of the test sensitivity and specificity (upper limit of  
54  
55  
56  
57



sensitivity, lower limit of specificity; and lower limit of sensitivity, upper limit of specificity) to report sensitivity analyses.

We analyzed the difference in seroprevalence estimates across levels of a categorical variable using a Chi-square test adjusted for the sampling design.

We estimated the number of SARS-CoV-2 infections by multiplying the weighted seroprevalence adjusted for test performance with the estimated population of the valley. To estimate the number of infections per reported case, we divided the estimated number of SARS-CoV-2 infections by the reported number of COVID-19 cases two weeks before the survey date. We calculated the infection fatality rate by dividing the reported number of deaths by the number of estimated infections, assuming a three-week lag time from infection to death.[24]

We analyzed the data using Stata version 15 (StataCorp. 2017. Stata Statistical Software: Release 15. College Station, TX: StataCorp LP.).

### Patient and Public Involvement

No patients or members of the public were involved in this study.

### RESULTS

We enumerated 6 397 individuals  $\geq 18$  years from 3 077 households and 110 clusters (34 urban clusters and 76 rural clusters) between 17 Oct 2020 and 04 Nov 2020. Of the 6 397 eligible individuals, 6 315 (98.7%) agreed to participate and were enrolled. The final analysis was done on a sample of 6 230 participants. (Figure 2)

Of the 6 230 participants, 1 513 (24.3%) were between 18 and 30 years of age, 2 672 (42.9%) were aged 30-49 years, 1 643 (26.4%) were aged 50-69 years, and 402 (6.4%) were 70 years and older. (Table 1). There was equal representation from males and females, and 3 364 (54.0%) resided in a rural area. Of the 3 104 females, 56 (1.8%) reported being pregnant at the time of the survey. Four hundred seventy-four (7.6%) reported COVID-19 like symptoms in the three months preceding the survey, and 439 (7.0%) reported to have ever come in contact with a known COVID-19 case. One thousand ninety-two (17.5%) reported having been tested for COVID-19 using RT-PCR or a Rapid Antigen Test (RAT) previously, of whom 176 (16.2%) reported to have tested positive for the disease.

**Table 1: Characteristics of study participants**

|                   | Frequency | Percent |
|-------------------|-----------|---------|
| <b>Total</b>      | 6230      |         |
| <b>Age, years</b> |           |         |
| 18-29             | 1513      | 24.3    |
| 30-49             | 2672      | 42.9    |
| 50-69             | 1643      | 26.4    |
| $\geq 70$         | 402       | 6.5     |
| <b>Gender</b>     |           |         |
| Male              | 3126      | 50.2    |
| Female            | 3104      | 49.8    |

|                                                      |      |      |
|------------------------------------------------------|------|------|
| <b>Residence</b>                                     |      |      |
| Urban                                                | 2866 | 46.0 |
| Rural                                                | 3364 | 54.0 |
| <b>Pregnant (n=3104)</b>                             | 56   | 1.8  |
| <b>Self-reported history of chronic disease</b>      | 1145 | 18.4 |
| <b>History of COVID-19 like symptoms</b>             | 474  | 7.6  |
| <b>History of contact with a known COVID-19 case</b> | 439  | 7.0  |
| <b>Ever tested for COVID-19 (RT-PCR)</b>             | 1092 | 17.5 |
| <b>RT-PCR result (n=1088*)</b>                       |      |      |
| Positive                                             | 176  | 16.2 |
| Negative                                             | 912  | 83.8 |

COVID-19: Coronavirus disease; RT-PCR: Reverse transcriptase-polymerase chain reaction

\*RT-PCR result not known in four participants

We found an overall unweighted seroprevalence of 38.8% (95% CI 37.6 – 40.0). The seroprevalence ranged from 28.5% in district Kulgama to 43.1% in district Pulwama. (Figure 1 and online supplemental file 1) The overall weighted seroprevalence (adjusted for sampling design) was 36.9% (95% CI 34.5 – 39.4). The weighted seroprevalence adjusted for test performance was 36.7% (95% CI 34.3 – 39.2). (Table 2) Upon sensitivity analyses, the weighted seroprevalence adjusted for test performance ranged from 36.3% (95% CI 33.9 – 38.8) to 38.4% (95% CI 35.9 – 41.0). (Table 3)

**Table 2: Seroprevalence of SARS-CoV-2 specific IgG antibodies by participant characteristics**

|                   | Number tested | Number seropositive | Unweighted seroprevalence, % (95% CI) | Weighted seroprevalence, % (95% CI) | Weighted seroprevalence adjusted for test performance, % (95% CI) | Design-based F, p-value |
|-------------------|---------------|---------------------|---------------------------------------|-------------------------------------|-------------------------------------------------------------------|-------------------------|
| <b>Total</b>      | 6230          | 2415                | 38.8 (37.6-40.0)                      | 36.9 (34.5-39.4)                    | 36.7 (34.3-39.2)                                                  |                         |
| <b>Age, years</b> |               |                     |                                       |                                     |                                                                   |                         |
| 18-29             | 1513          | 538                 | 35.6 (33.2-38.0)                      | 33.7 (30.1-37.6)                    | 33.5 (29.8-37.4)                                                  | 6.42, 0.0006            |
| 30-49             | 2672          | 1000                | 37.4 (35.6-39.3)                      | 36.3 (33.5-39.3)                    | 36.1 (33.3-39.1)                                                  |                         |
| 50-69             | 1643          | 691                 | 42.1 (39.7-44.5)                      | 42.5 (38.8-46.2)                    | 42.3 (38.6-46.0)                                                  |                         |
| ≥70               | 402           | 186                 | 46.3 (41.5-51.2)                      | 45.3 (37.8-53.0)                    | 45.1 (37.6-52.8)                                                  |                         |
| <b>Gender</b>     |               |                     |                                       |                                     |                                                                   |                         |
| Male              | 3126          | 1166                | 37.3 (35.6-39.0)                      | 36.1 (33.5-38.9)                    | 35.9 (33.3-38.7)                                                  | 0.94, 0.34              |
| Female            | 3104          | 1249                | 40.2 (38.5-42.0)                      | 37.8 (34.5-41.3)                    | 37.6 (34.3-41.1)                                                  |                         |
| <b>Residence</b>  |               |                     |                                       |                                     |                                                                   |                         |
| Urban             | 2866          | 1180                | 41.2 (39.4-43.0)                      | 40.2 (36.3-44.1)                    | 40.0 (36.1-43.9)                                                  | 3.43, 0.07              |

|                                                      |      |      |                  |                  |                  |                |
|------------------------------------------------------|------|------|------------------|------------------|------------------|----------------|
| Rural                                                | 3364 | 1235 | 36.7 (35.1-38.4) | 35.5 (32.5-38.7) | 35.3 (32.2-38.5) |                |
| <b>Self-reported history of chronic disease</b>      |      |      |                  |                  |                  |                |
| Yes                                                  | 1145 | 495  | 43.2 (40.4-46.1) | 41.9 (37.4-46.6) | 41.7 (37.2-46.4) | 6.14, 0.02     |
| No                                                   | 5085 | 1920 | 37.8 (36.4-39.1) | 36.2 (33.7-38.9) | 36.0 (33.5-38.7) |                |
| <b>History of COVID-19 like symptoms</b>             |      |      |                  |                  |                  |                |
| Yes                                                  | 474  | 247  | 52.1 (47.6-56.6) | 47.4 (37.9-57.1) | 47.2 (37.7-56.9) | 5.53, 0.02     |
| No                                                   | 5756 | 2168 | 37.7 (36.4-38.9) | 36.3 (33.9-38.8) | 36.1 (33.7-38.6) |                |
| <b>History of contact with a known COVID-19 case</b> |      |      |                  |                  |                  |                |
| Yes                                                  | 439  | 219  | 49.9 (45.2-54.5) | 45.2 (38.3-52.2) | 45.0 (38.1-52.0) | 7.13, 0.01     |
| No                                                   | 5791 | 2196 | 37.9 (36.7-39.2) | 36.5 (34.1-39.0) | 36.3 (33.9-38.8) |                |
| <b>Ever tested for COVID-19 (RT-PCR)</b>             |      |      |                  |                  |                  |                |
| Yes                                                  | 1092 | 485  | 44.4 (41.5-47.4) | 41.0 (35.4-46.9) | 40.8 (35.2-46.7) | 2.17, 0.14     |
| No                                                   | 5138 | 1930 | 37.6 (36.2-38.9) | 36.2 (33.5-39.0) | 36.0 (33.3-38.8) |                |
| <b>RT-PCR result (n=1088*)</b>                       |      |      |                  |                  |                  |                |
| Positive                                             | 176  | 140  | 79.5 (73.0-84.9) | 81.8 (74.8-87.1) | 81.7 (74.7-87.1) | 74.93, <0.0001 |
| Negative                                             | 912  | 345  | 37.8 (34.7-41.0) | 38.8 (33.3-44.7) | 38.6 (33.1-44.5) |                |

COVID-19: Coronavirus disease; RT-PCR: Reverse transcriptase-polymerase chain reaction

\*RT-PCR result not known in four participants

**Table 3: Sensitivity analyses for seroprevalence at extremes of test performance**

|                   | Weighted seroprevalence, % (95% CI) | Weighted seroprevalence adjusted for test performance, % (95% CI)<br>[Sensitivity 100.00%, Specificity 99.63%] | Weighted seroprevalence adjusted for test performance, % (95% CI)<br>[Sensitivity 95.89%, Specificity 99.90%] | Weighted seroprevalence adjusted for test performance, % (95% CI)<br>[Sensitivity 100.00%, Specificity 99.05%] |
|-------------------|-------------------------------------|----------------------------------------------------------------------------------------------------------------|---------------------------------------------------------------------------------------------------------------|----------------------------------------------------------------------------------------------------------------|
| <b>Overall</b>    | 36.9 (34.5-39.4)                    | 36.7 (34.3-39.2)                                                                                               | 38.4 (35.9-41.0)                                                                                              | 36.3 (33.9-38.8)                                                                                               |
| <b>Age, years</b> |                                     |                                                                                                                |                                                                                                               |                                                                                                                |
| 18-29             | 33.7 (30.1-37.6)                    | 33.5 (29.8-37.4)                                                                                               | 35.1 (31.3-39.1)                                                                                              | 33.1 (29.4-37.0)                                                                                               |

7

|                                                      |                  |                  |                  |                  |
|------------------------------------------------------|------------------|------------------|------------------|------------------|
| 30-49                                                | 36.3 (33.5-39.3) | 36.1 (33.3-39.1) | 37.8 (34.9-40.9) | 35.7 (32.9-38.7) |
| 50-69                                                | 42.5 (38.8-46.2) | 42.3 (38.6-46.0) | 44.3 (40.4-48.1) | 41.9 (38.2-45.7) |
| ≥70                                                  | 45.3 (41.8-48.8) | 45.1 (41.6-48.6) | 47.2 (43.4-51.0) | 44.8 (41.2-48.4) |
| <b>Gender</b>                                        |                  |                  |                  |                  |
| Male                                                 | 36.1 (33.5-38.9) | 35.9 (33.3-38.7) | 37.6 (34.9-40.5) | 35.5 (32.9-38.3) |
| Female                                               | 37.8 (34.5-41.3) | 37.6 (34.3-41.1) | 39.4 (35.9-43.0) | 37.2 (33.9-40.7) |
| <b>Residence</b>                                     |                  |                  |                  |                  |
| Urban                                                | 40.2 (36.3-44.1) | 40.0 (36.1-43.9) | 41.9 (37.8-45.9) | 39.6 (35.7-43.6) |
| Rural                                                | 35.5 (32.5-38.7) | 35.3 (32.2-38.5) | 37.0 (33.8-40.3) | 34.9 (31.9-38.1) |
| <b>Self-reported history of chronic disease</b>      |                  |                  |                  |                  |
| Yes                                                  | 43.2 (40.4-46.1) | 41.9 (37.4-46.6) | 43.6 (38.9-48.5) | 41.3 (36.8-46.1) |
| No                                                   | 37.8 (36.4-39.1) | 36.2 (33.7-38.9) | 37.7 (35.1-40.5) | 35.6 (33.1-38.3) |
| <b>History of COVID-19 like symptoms</b>             |                  |                  |                  |                  |
| Yes                                                  | 52.1 (47.6-56.6) | 47.4 (37.9-57.1) | 49.4 (39.5-59.5) | 46.9 (37.3-56.7) |
| No                                                   | 37.7 (36.4-38.9) | 36.3 (33.9-38.8) | 37.8 (35.3-40.4) | 35.7 (33.3-38.2) |
| <b>History of contact with a known COVID-19 case</b> |                  |                  |                  |                  |
| Yes                                                  | 49.9 (45.2-54.5) | 45.2 (38.3-52.2) | 47.1 (39.9-54.4) | 44.7 (37.7-51.7) |
| No                                                   | 37.9 (36.7-39.2) | 36.5 (34.1-39.0) | 38.0 (35.5-40.6) | 35.9 (33.5-38.4) |
| <b>Ever tested for COVID-19 (RT-PCR)</b>             |                  |                  |                  |                  |
| Yes                                                  | 44.4 (41.5-47.4) | 41.0 (35.4-46.9) | 42.7 (36.9-48.9) | 40.4 (34.8-46.4) |
| No                                                   | 37.6 (36.2-38.9) | 36.2 (33.5-39.0) | 37.7 (34.9-40.6) | 35.6 (32.9-38.4) |
| <b>RT-PCR result (n=1088*)</b>                       |                  |                  |                  |                  |
| Positive                                             | 79.5 (73.0-84.9) | 81.8 (74.8-87.1) | 85.3 (78.0-90.8) | 81.6 (74.6-87.0) |
| Negative                                             | 37.8 (34.7-41.0) | 38.8 (33.3-44.7) | 40.4 (34.7-46.6) | 38.2 (32.7-44.2) |

Seroprevalence was lowest among participants aged 18-29 years [33.5% (95% CI 29.8 – 37.4)] and was higher in older age groups. Seroprevalence was highest in those aged 70 years and above [45.1% (95% CI 37.6 – 52.8)]. Seroprevalence was not significantly different among males and females ( $p=0.34$ ). The seroprevalence among urban residents was 40.0% (95% CI 36.1 – 43.9), slightly but not significantly, higher than rural residents [35.3% (95% CI 32.2 – 38.5),  $p=0.07$ ]. (Table 2)

One in five participants (1145/6230, 18.4%) self-reported history of at least one chronic disease (Table 1). Hypertension (815/6230, 13.1%) and diabetes mellitus (314/6230, 5.0%) were the most commonly reported chronic diseases (online supplemental file 2). Seroprevalence was significantly higher in participants who self-reported history of chronic disease (41.7%, 95% CI 37.2 – 46.4) as compared to those who did not report a history of chronic disease (36.0%, 95% CI 33.5 - 38.7) (Table 2).

1  
2  
3 Among participants who reported a history of COVID-19 like symptoms, seroprevalence was 47.2% (95%  
4 CI 37.7 – 56.9) compared with 36.1% (95% CI 33.7 – 38.6) among participants who did not report such  
5 symptoms. Seroprevalence was higher among those who reported contact with a known COVID-19 case  
6 [45.0% (95% CI 38.1 – 52.0)] than participants who did not report any history of such contact [36.3%  
7 (95% CI 33.9 – 38.8)]. (Table 2)  
8  
9

10 Seroprevalence was not significantly related to being tested for COVID-19 (RT-PCR). However, those who  
11 reported a positive RT-PCR COVID-19 test had significantly higher seroprevalence (81.7%, 95% CI 74.7 –  
12 87.1) as compared to those who reported a negative RT-PCR COVID-19 test (38.6%, 95% CI 33.1 – 44.5).  
13 (Table 2)  
14

15 Among 2 415 seropositive individuals, only 247 (10.2%) reported a history of COVID-19 like symptoms.  
16 Only 20.1% (485/2415) of the seropositive individuals were tested for COVID-19 (RT-PCR). Among 474  
17 who reported a history of COVID-19 like symptoms, 233 (49.2%) were tested for COVID-19 (RT-PCR).  
18 Among 4897 individuals who did not report a history of COVID-19 like symptoms and were never tested  
19 for COVID-19 (RT-PCR), 1825 (37.3%) were seropositive. (Figure 3)  
20  
21

22 Among 36 participants who reported a positive RT-PCR COVID-19 test but were seronegative, the  
23 duration between COVID-19 RT-PCR test and serological testing ranged from 9 days to 101 days. In only  
24 four of these 36 participants, the duration between the COVID-19 RT-PCR test and the serological test  
25 was 14 days or less. Of the remaining 32 participants, 21 did not report a history of COVID-19 like  
26 symptoms, nine did not report a history of contact with a known COVID-19 case, and eight reported  
27 neither a history of COVID-19 like symptoms nor a history of contact with a known COVID-19 case.  
28  
29

30 We estimated that there were 1 673 484 (95% CI 1 564 047 – 1 787 482) cumulative number of  
31 infections among adults aged  $\geq 18$  years in the valley by 03 Oct 2020, two weeks before the start of the  
32 survey. If we assume that the seroprevalence was similar to the overall seroprevalence in the population  
33 not included in our study ( $< 18$  years of age) then the estimated cumulative number of infections in the  
34 valley by 03 Oct 2020 was 2 791 933 (95% CI 2 609 354 – 2 982 119). Considering that the cumulative  
35 number of reported COVID-19 cases was 47 071 by 03 Oct 2020 (Figure 4), we estimate the number of  
36 infections per reported case as 59.3 (95% CI 55.4 – 63.4). The number of reported COVID-19 deaths after  
37 a three-week lag period (on 24 Oct 2020) was 955. Thus, we estimated the infection fatality rate as  
38 0.034% (95% CI 0.032 – 0.037).  
39  
40

41 Figure 5 depicts the relationship between the estimated number of SARS-CoV-2 infected persons,  
42 reported COVID-19 cases, and reported COVID-19 deaths. Of the total estimated SARS-CoV-2 infected  
43 persons, only 1.69% were reported. Of the total reported COVID-19 cases, 2.03% died.  
44  
45

## 46 DISCUSSION

47 We report the results of a seroprevalence survey conducted in Kashmir from October-November 2020,  
48 seven months after the appearance of the first local COVID-19 case. The COVID-19 pandemic is rapidly  
49 evolving worldwide. In Kashmir, several important events happened since we completed our survey.  
50 From 16 Jan 2021, COVID-19 vaccination was introduced in a phased manner. Healthcare workers were  
51 given preference during the first phase. From 01 Mar 2021, the vaccine was made available for people  
52  $\geq 60$  years of age and those with chronic diseases in the age group of 45-59 years. However, especially  
53 during the early phases of the COVID-19 vaccination campaign, many people were hesitant to receive  
54  
55  
56  
57

1  
2  
3 the vaccine doses. During the same time, SARS-CoV-2 Variants of Concern began to emerge and  
4 circulate. The daily number of COVID-19 cases started to rise again. The 'second wave' in April 2021 was  
5 more explosive than the 'first wave' at the beginning of the pandemic. The fear of the disease had  
6 diminished, and COVID appropriate behaviour was no more a norm. The government and the people  
7 were caught unawares. There were several reports of a possible 'second infection' and reports of cases  
8 among previously vaccinated individuals. Given these developments, the current seroprevalence in  
9 Kashmir will be higher than what we report in this study.  
10  
11

12 The results of our study indicate that by the first week of October 2020, nearly seven months after the  
13 appearance of the first laboratory-confirmed COVID-19 case on 18 March 2020, close to 37% of the  
14 valley's population aged  $\geq 18$  years had been infected. Our results suggest that the cumulative number of  
15 SARS-CoV-2 infections by the first week of October 2020 was nearly 2.8 million, with an estimated  
16 infection fatality rate of 0.034%. Seroprevalence did not differ by gender but was higher in older age  
17 groups.  
18  
19

20 The findings of our study are based on a representative sample of the population. The laboratory test  
21 used for the detection of SARS-CoV-2 specific IgG antibodies in serum samples provides valid  
22 results.[20,25] We report seroprevalence estimates adjusted for sampling design and test performance.  
23

24 The overall adjusted seroprevalence of around 37% indicates that, by October 2020, a large proportion  
25 of the valley's population had been infected with the virus. Easing of lockdown, being fed up with the  
26 restrictions, and non-adherence to prevention norms are the possible reasons. Using several  
27 assumptions about the test sensitivity and specificity to calculate adjusted seroprevalence estimates  
28 yielded small differences.  
29  
30

31 Several factors potentially influence the seroprevalence rates. These include population density, social  
32 and demographic structure of the population, governmental policies and the extent of their  
33 implementation, immunity level of the population, time since the start of infection transmission,  
34 adherence to infection prevention guidelines, quality of contact tracing and quarantine, and possibly the  
35 geography and environment of an area. The emergence of several Variants of Concern and the  
36 introduction of COVID-19 vaccination will also influence population immunity. Herd immunity in the  
37 context of COVID-19 is a matter of debate as reports of a second infection continue to pour in.[26]  
38  
39

40 Comparison with previous reports suggests that, by October 2020, the seroprevalence had increased  
41 almost ten-fold since July 2020.[16,27] The second of the three nationwide seroprevalence surveys in  
42 India conducted in August-September 2020 reports an overall seroprevalence of 6.6%, ranging from  
43 5.2% in rural areas to 16.9% in urban slums.[28] A nationwide survey conducted in December 2020-  
44 January 2021 reported an overall seroprevalence of 24.1% ranging from 4.9% - 44.4% across  
45 districts.[29] Kashmir is thus not a low-infection area. Being an oft-visited tourist area, Kashmir is at an  
46 increased risk of infection transmission. Adherence to COVID appropriate behavior (use of face masks in  
47 public, frequent handwashing, physical and social distancing) has been poor. The experience of a  
48 'second wave' of COVID-19 in April-June 2021, the appearance of virus variants, and the introduction of  
49 vaccination programs warrant robust surveillance of the epidemic.  
50  
51  
52

53 The seroprevalence of SARS-CoV-2 IgG antibodies was higher in older age groups. During the early  
54 period of the pandemic, people were adherent to social distancing and other non-pharmaceutical  
55 interventions because of a fear of the disease and administrative restrictions. With time, administrative  
56  
57

1  
2  
3 restrictions were relaxed, fear of the disease attenuated, and people became fed up with the social  
4 restrictions. This led to an increase in the number of reported COVID-19 cases and provided the  
5 population, including older age groups, an opportunity to contract the infection. That older people have  
6 an increased risk of symptomatic and more severe disease is now well known.[30,31] However, age-  
7 based differential susceptibility to SARS-CoV-2 infection antibody response and the reasons thereof are  
8 still a grey area and need further understanding. Existing literature might suggest that the more mobile  
9 and socially active young have a higher risk of infection.[6,7] However, this should not imply that the  
10 elderly have a decreased susceptibility to SARS-CoV-2 infection or a decreased antibody response.[32]  
11 On the contrary, several studies suggest that the seroprevalence of SARS-CoV-2 specific IgG antibodies is  
12 higher in the older age groups and particularly so in more dense population groups.[4,5,8–11,13]  
13 Furthermore, SARS-CoV-2 antibody levels have been reported to be higher in older people.[12]

14  
15  
16  
17 The seroprevalence of SARS-CoV-2 specific IgG antibodies did not differ significantly by gender, though  
18 the figure was slightly higher for females. These findings are consistent with the available  
19 literature.[6,13] Difference in seroprevalence by gender has been suggested by some studies, and  
20 females have been reported to have lower antibody levels.[5,7,9,11,12,14,33]

21  
22  
23 Urban areas are more densely populated than rural areas, accelerating the transmission of infections in  
24 the population. The seroprevalence of SARS-CoV-2 specific IgG antibodies is thus expected to be higher  
25 in urban areas, especially during the early phases of an epidemic. However, as the epidemic progresses,  
26 the seroprevalence gap between urban and rural areas will wane off. We estimated an adjusted  
27 seroprevalence of 40·0% (95% CI 36·1 – 43·9) in urban areas as compared to 35·3% (95% CI 32·2 – 38·5)  
28 in rural areas (p=0·07).

29  
30  
31 People with a chronic disease experience more severe COVID-19 symptoms and are more likely to die  
32 when compared to people with no chronic disease.[34] We found a higher proportion of symptomatic  
33 infection among participants with a self-reported history of chronic disease (78/1145, 6·8%) as  
34 compared to participants with no chronic disease (169/5085, 3·3%) (online supplemental file 3). Little is,  
35 however, known about the risk of infection in chronic disease patients. We found a significantly higher  
36 seroprevalence among participants with a self-reported history of chronic disease (Table 2). This finding  
37 needs further research for corroboration and possible explanations.

38  
39  
40 People with a self-reported history of COVID-19 related symptoms, contact with a known COVID-19  
41 case, or a positive COVID-19 RT-PCR had a higher seroprevalence as compared to their complement.  
42 Among seropositive individuals, only 10·2% reported being symptomatic. The percentage of  
43 asymptomatic infections, thus, was 90%. However, only 49% of individuals with a history of COVID-19  
44 like symptoms were tested using RT-PCR. We also estimated that only one out of almost 59 infections  
45 gets reported. This reflects the necessity of improving the efficiency of RT-PCR testing so that more  
46 symptomatic individuals receive the test. Not all individuals with a known RT-PCR positive result showed  
47 the presence of IgG antibodies. Around 20% of RT-PCR positive individuals were seronegative, and in a  
48 large majority of them (32 out of 36), the duration since RT-PCR positivity was more than two weeks.  
49 This may be attributed to a poor B cell response or a false negative antibody test.[35] Around 38% of RT-  
50 PCR negative individuals were seropositive, suggesting a false-negative RT-PCR or infection acquisition at  
51 a date later than the RT-PCR test.

52  
53  
54 We estimated an infection fatality rate of 0·034% (95% CI 0·032 – 0·037). The infection fatality rate in  
55 SARS-CoV-2 infection has been reported to range from as low as 0·00% to 1·63%.[36] Our estimates of  
56  
57

1  
2  
3 the infection fatality rate are low as compared to estimates from several Indian studies.[5,28,37] Under-  
4 reporting COVID-19 deaths because of the non-uniform definition for a 'COVID-19 death' may falsely  
5 lower the infection fatality rates.[38] Many other factors can influence the infection fatality rate in SARS-  
6 CoV-2 infection – the quality of available health facilities, the age structure of the population, and  
7 COVID-19 epidemic intensity.[39,40] Developing countries usually have a younger population as  
8 compared to the developed countries, and Kashmir is not an exception. However, because of the  
9 possibility of under-reporting of COVID-19 deaths, the true infection fatality rate in Kashmir may be  
10 higher than our estimates. The infection fatality rate is, however, known to be lower in developing  
11 nations.[30,41] In developed nations like the United States and many European countries, a higher  
12 infection fatality rate has been reported.[30,42]  
13  
14  
15

### 16 **Limitations**

17  
18 One important limitation of our study is that even though we adjusted the weighted seroprevalence  
19 estimates for test performance using manufacturer-provided sensitivity and specificity (100% and  
20 99-63% respectively), we did not quantify the test validity in-house. Another limitation of our study  
21 estimates is that we excluded people <18 years of age. The results of our study may not thus be  
22 generalizable to this group of the population.  
23

24 Our estimated seroprevalence was much higher than we anticipated at the designing stage. This has  
25 impacted the precision of our estimates to some extent. However, we believe we still have been able to  
26 estimate the seroprevalence with reasonable precision.  
27

28 Lack of reliable death counts is another potential limitation. This may have led to an underestimation of  
29 the infection fatality rate. We did not perform any adjustment for death counts. Further, because of lack  
30 of age- and gender-specific mortality data, we could not estimate age- and gender-specific infection  
31 fatality rates.  
32  
33

### 34 **CONCLUSIONS**

35  
36 We conclude that nearly 37% of individuals aged 18 years and above were infected with SARS-CoV-2 in  
37 Kashmir by October 2020. The infection fatality rate in the valley is around 0.034%. A majority of cases  
38 go unreported. For every reported case, there are 59 unreported infections in the population. Since  
39 almost half of the symptomatic individuals go unreported, testing of symptomatic individuals and  
40 effective contact tracing needs to continue. Given the emergence of mutant Variants of Concern,  
41 increasing the population immunity through augmented and sustained vaccination is necessary. We  
42 further recommend that adherence to COVID-19 prevention measures should be ensured until a large  
43 proportion of the population gets vaccinated.  
44  
45

### 46 **ACKNOWLEDGMENTS**

47  
48 We thank Prof. Samia Rashid for her support. We acknowledge the help from Divisional COVID-19  
49 Control Room Kashmir, especially from Dr. Rauf Hussain Rather. We thank the following coordinating  
50 center teams and the laboratory support team for their support and coordination:  
51

52 Coordinating center teams: Dr. Sabira Aalia Dkhar, Dr. Kouser Sideeq, Dr. Uruj Qureshi, Dr. Mehraj u Din  
53 Sofi, Dr. Yasmin Kango, Dr. Suhail Manzoor Shah, Dr. Bashir Ahmad Khan, Dr. Nabeel Ishtiyag, Dr.  
54 Tajamul Hussain Khan, Dr. Lahoot Hassan Khan, Dr. Muzaffer Ahmad, Dr. Ramesh Kumar Malla, Dr.  
55  
56  
57



1  
2  
3 Ruqaya Rasool Kapta, Dr. Mohammad Yousuf Naikoo, Dr. Khalid Abbass, Dr. Zarar Ahmad Bhat, Dr.  
4 Sumair Rashid, Dr. Zubair Ahmad, Dr. Shalender Singh Bali, Dr. Abdul Rouf, Dr. Abdul Hamid, Dr. Khalid  
5 Bashir, Dr. Qazi Najeeb Ahmad, Dr. Syed Irtiza, Dr. P Sharik Shaheen Khaki, Dr. Sheikh Mohammad Shafi,  
6 Dr. Mohammad Yousuf Zagoo, Dr. Mukhtar Ahmad Shah, Dr. Imtiyaz-ur-Rehman Bhat, Dr. Showkat  
7 Parray, Dr. Fazil Ali Kochak, Dr. Muzaffar Ahmad Zargar, Dr. Abdul Rashid Shah, Dr. Shagufta Saleem, Dr.  
8 Abdul Gani, Dr. Nighat Nasreen, Dr. Asima Nazeer, Dr. Zahoor Ahmad Lone.  
9

10  
11 Laboratory support team: Ishtiyag Ahmad Handoo, Rahiba Makhdoomi, Iyman Wani, Romana Rasool,  
12 Asiya Rehman, Insha Rehman, Zahoor Ahmad, Gulzar Ahmad Wani, Javid Ahmad Bhat, M Saleem Malik,  
13 Naveed Manzoor, Mubeena.  
14

### 15 **COMPETING INTERESTS**

16  
17 We declare no competing interests, financial or otherwise.  
18

### 19 **FUNDING**

20  
21 The National Health Mission Jammu & Kashmir funded the study. The funding agency was not involved  
22 in study designing, implementation, analysis, or interpretation of the study findings.  
23

### 24 **CONTRIBUTORS**

25  
26 S Muhammad Salim Khan: Conceptualization, Funding acquisition, Methodology, Writing-review &  
27 editing.  
28

29 Mariya Amin Qurieshi, Inaamul Haq, Sabhiya Majid: Formal analysis, Data curation, Methodology,  
30 Project administration, Writing-original draft, Writing-review & editing.  
31

32 Javid Ahmad, Taha Ayub, Anjum Bashir, Ashfaq Ahmad Bhat, Abdul Majeed Ganai, Yasmeen Jan, Rauf-  
33 ur-Rashid Kaul, Zahid Ali Khan, Muneer Ahmad Masoodi, Beenish Mushtaq, Fouzia Nazir, Muzamil Nazir,  
34 Malik Waseem Raja, Mahbooba Rasool: Project administration, Supervision, Investigation, Writing-  
35 review & editing.  
36

37 Anjum Asma, Munazza Aziz, Shifana Ayoub, Arif Akbar Bhat, Iqra Nisar Chowdri, Shaista Ismail, Misbah  
38 Ferooz Kawoosa, Mehvish Afzal Khan, Mosin Saleem Khan, Rafiya Kousar, Ab Aziz Lone, Shahroz Nabi,  
39 Mohammad Obaid, Tanzeela Bashir Qazi, Iram Sabah, Ishtiyag Ahmad Sumji: Supervision, Investigation,  
40 Writing-review & editing.  
41

42  
43 S Muhammad Salim Khan, Mariya Amin Qurieshi, Inaamul Haq, and Sabhiya Majid have verified the  
44 underlying data.  
45

### 46 **DATA SHARING**

47  
48 Anonymized data collected for the study, including individual participant data and a data dictionary  
49 defining each field in the set, will be made available to interested researchers on request by Inaamul  
50 Haq ([haqinaam@yahoo.co.in](mailto:haqinaam@yahoo.co.in)) for two years from publication. The study protocol, statistical analysis  
51 plan, and informed consent forms are also available from Inaamul Haq.  
52  
53  
54  
55  
56  
57

## REFERENCES

- 1 Timeline of WHO's response to COVID-19. <https://www.who.int/emergencies/diseases/novel-coronavirus-2019/interactive-timeline#!> (accessed 26 Mar 2021).
- 2 Saleem S, Quansar R, Qurieshi M. COVID-19: Preparedness and response by union territory of Jammu and Kashmir for containment of pandemic. *Curr Med Issues* 2020;**18**:206. doi:10.4103/cmi.cmi\_56\_20
- 3 Peirlinck M, Linka K, Sahli Costabal F, *et al.* Visualizing the invisible: The effect of asymptomatic transmission on the outbreak dynamics of COVID-19. *Comput Methods Appl Mech Eng* 2020;**372**. doi:10.1016/j.cma.2020.113410
- 4 Borges LP, Martins AF, de Melo MS, *et al.* Seroprevalence of SARS-CoV-2 IgM and IgG antibodies in an asymptomatic population in Sergipe, Brazil. *Rev Panam Salud Publica/Pan Am J Public Heal* 2020;**44**:e108. doi:10.26633/RPSP.2020.108
- 5 Malani A, Shah D, Kang G, *et al.* Seroprevalence of SARS-CoV-2 in slums versus non-slums in Mumbai, India. *Lancet Glob. Heal.* 2021;**9**:e110–1. doi:10.1016/S2214-109X(20)30467-8
- 6 Capai L, Ayhan N, Masse S, *et al.* Seroprevalence of SARS-CoV-2 IgG Antibodies in Corsica (France), April and June 2020. *J Clin Med* 2020;**9**:3569. doi:10.3390/jcm9113569
- 7 Mahajan S, Srinivasan R, Redlich CA, *et al.* Seroprevalence of SARS-CoV-2-Specific IgG Antibodies Among Adults Living in Connecticut: Post-Infection Prevalence (PIP) Study. *Am J Med* 2021;**134**:526-534.e11. doi:10.1016/j.amjmed.2020.09.024
- 8 Goldstein E, Lipsitch M, Cevik M. On the Effect of Age on the Transmission of SARS-CoV-2 in Households, Schools, and the Community. *J Infect Dis* 2021;**223**:362–9. doi:10.1093/infdis/jiaa691
- 9 Pan Y, Li X, Yang G, *et al.* Seroprevalence of SARS-CoV-2 immunoglobulin antibodies in Wuhan, China: part of the city-wide massive testing campaign. *Clin Microbiol Infect* 2021;**27**:253–7. doi:10.1016/j.cmi.2020.09.044
- 10 Pagani G, Conti F, Giacomelli A, *et al.* Seroprevalence of SARS-CoV-2 significantly varies with age: Preliminary results from a mass population screening. *J. Infect.* 2020;**81**:e10–2. doi:10.1016/j.jinf.2020.09.021
- 11 Vena A, Berruti M, Adessi A, *et al.* Prevalence of Antibodies to SARS-CoV-2 in Italian Adults and Associated Risk Factors. *J Clin Med* 2020;**9**:2780. doi:10.3390/jcm9092780
- 12 Gudbjartsson DF, Norddahl GL, Melsted P, *et al.* Humoral Immune Response to SARS-CoV-2 in Iceland. *N Engl J Med* 2020;**383**:1724–34. doi:10.1056/nejmoa2026116
- 13 Pollán M, Pérez-Gómez B, Pastor-Barriuso R, *et al.* Prevalence of SARS-CoV-2 in Spain (ENE-COVID): a nationwide, population-based seroepidemiological study. *Lancet* 2020;**396**:535–44. doi:10.1016/S0140-6736(20)31483-5
- 14 Stringhini S, Wisniak A, Piumatti G, *et al.* Seroprevalence of anti-SARS-CoV-2 IgG antibodies in Geneva, Switzerland (SEROCoV-POP): a population-based study. *Lancet* 2020;**396**:313–9. doi:10.1016/S0140-6736(20)31304-0
- 15 Clapham H, Hay J, Routledge I, *et al.* Seroepidemiologic study designs for determining SARS-COV-

14

- 2 transmission and immunity. *Emerg. Infect. Dis.* 2020;**26**:1978–86. doi:10.3201/eid2609.201840
- 16 Khan SMS, Qurieshi MA, Haq I, *et al.* Seroprevalence of SARS-CoV-2 specific IgG antibodies in District Srinagar, northern India – A cross-sectional study. *PLoS One* 2020;**15**:e0239303. doi:10.1371/journal.pone.0239303
- 17 OpenEpi - Toolkit Shell for Developing New Applications. <http://www.openepi.com/SampleSize/SSPropor.htm> (accessed 5 Jul 2021).
- 18 Census of India Website : Office of the Registrar General & Census Commissioner, India. <https://www.censusindia.gov.in/> (accessed 26 Mar 2021).
- 19 Epicollect5 - Free and easy-to-use mobile data-gathering platform. <https://five.epicollect.net/> (accessed 26 Mar 2021).
- 20 SARS-CoV-2 Immunoassay | Abbott Core Laboratory. <https://www.corelaboratory.abbott/us/en/offerings/segments/infectious-disease/sars-cov-2> (accessed 26 Mar 2021).
- 21 Brown LD, Cai TT, Das Gupta A. Interval estimation for a binomial proportion. *Stat Sci* 2001;**16**:101–17. doi:10.1214/ss/1009213286
- 22 Census of India Website : Office of the Registrar General & Census Commissioner, India. [https://censusindia.gov.in/vital\\_statistics/SRS\\_Bulletins/Bulletins.html](https://censusindia.gov.in/vital_statistics/SRS_Bulletins/Bulletins.html) (accessed 26 Mar 2021).
- 23 Sempos CT, Tian L. Adjusting Coronavirus Prevalence Estimates for Laboratory Test Kit Error. *Am J Epidemiol* 2021;**190**:109–15. doi:10.1093/aje/kwaa174
- 24 Bendavid E, Mulaney B, Sood N, *et al.* COVID-19 antibody seroprevalence in Santa Clara County, California. *Int J Epidemiol* 2021;**50**:410–9. doi:10.1093/ije/dyab010
- 25 Bryan A, Pepper G, Wener MH, *et al.* Performance characteristics of the abbott architect sars-cov-2 igg assay and seroprevalence in Boise, Idaho. *J Clin Microbiol* 2020;**58**:e00941-20. doi:10.1128/JCM.00941-20
- 26 Elzein F, Ibrahim A, Alshahrani F, *et al.* Reinfection, recurrence, or delayed presentation of COVID-19? Case series and review of the literature. *J Infect Public Health* 2021;**14**:474–7. doi:10.1016/j.jiph.2021.01.002
- 27 Khan MS, Haq I, Qurieshi MA, *et al.* SARS-CoV-2 Seroprevalence Among Healthcare Workers by Workplace Exposure Risk in Kashmir, India. *J Hosp Med* 2021;**16**:274–81. doi:10.12788/jhm.3609
- 28 Murhekar M V., Bhatnagar T, Selvaraju S, *et al.* SARS-CoV-2 antibody seroprevalence in India, August–September, 2020: findings from the second nationwide household serosurvey. *Lancet Glob Heal* 2021;**9**:e257–66. doi:10.1016/S2214-109X(20)30544-1
- 29 Murhekar M V., Bhatnagar T, Thangaraj JWV, *et al.* SARS-CoV-2 seroprevalence among the general population and healthcare workers in India, December 2020–January 2021. *Int J Infect Dis* 2021;**108**:145–55. doi:10.1016/j.ijid.2021.05.040
- 30 O’Driscoll M, Ribeiro Dos Santos G, Wang L, *et al.* Age-specific mortality and immunity patterns of SARS-CoV-2. *Nature* 2021;**590**:140–5. doi:10.1038/s41586-020-2918-0
- 31 Kadambari S, Klenerman P, Pollard AJ. Why the elderly appear to be more severely affected by

- 1  
2  
3 COVID-19: The potential role of immunosenescence and CMV. *Rev. Med. Virol.* 2020;**30**:e2144.  
4 doi:10.1002/rmv.2144  
5
- 6 32 Pawelec G, Weng NP. Can an effective sars-cov-2 vaccine be developed for the older population?  
7 *Immun. Ageing.* 2020;**17**. doi:10.1186/s12979-020-00180-2  
8
- 9 33 Naranbhai V, Chang CC, Beltran WFG, *et al.* High seroprevalence of anti-SARS-CoV-2 antibodies in  
10 Chelsea, Massachusetts. *J Infect Dis* 2020;**222**:1955–9. doi:10.1093/infdis/jiaa579  
11
- 12 34 Yang J, Zheng Y, Gou X, *et al.* Prevalence of comorbidities and its effects in coronavirus disease  
13 2019 patients: A systematic review and meta-analysis. *Int J Infect Dis* 2020;**94**:91–5.  
14 doi:10.1016/j.ijid.2020.03.017  
15
- 16 35 Vabret N. Antibody responses to SARS-CoV-2 short-lived. *Nat Rev Immunol* 2020;**20**:519.  
17 doi:10.1038/s41577-020-0405-3  
18
- 19 36 Ioannidis JPA. Infection fatality rate of COVID-19 inferred from seroprevalence data. *Bull World*  
20 *Health Organ* 2021;**99**:19-33F. doi:10.2471/BLT.20.265892  
21
- 22 37 Murhekar M V., Bhatnagar T, Selvaraju S, *et al.* Prevalence of SARS-CoV-2 infection in India:  
23 Findings from the national serosurvey, May-June 2020. *Indian J Med Res* 2020;**152**:48–60.  
24 doi:10.4103/ijmr.IJMR\_3290\_20  
25
- 26 38 Pulla P. What counts as a covid-19 death? *BMJ* 2020;**370**:m2859. doi:10.1136/bmj.m2859  
27
- 28 39 Mahajan S, Caraballo C, Li S-X, *et al.* SARS-CoV-2 Infection Hospitalization Rate and Infection  
29 Fatality Rate Among the Non-Congregate Population in Connecticut. *Am J Med* 2021;**134**:812-  
30 816.e2. doi:10.1016/J.AMJMED.2021.01.020  
31
- 32 40 Kenyon C. COVID-19 Infection Fatality Rate Associated with Incidence-A Population-Level Analysis  
33 of 19 Spanish Autonomous Communities. *Biology (Basel)* 2020;**9**:1–4.  
34 doi:10.3390/BIOLOGY9060128  
35
- 36 41 Gu X, Mukherjee B, Das S, *et al.* COVID-19 prediction in South Africa: Understanding the  
37 unascertained cases - The hidden part of the epidemiological iceberg. medRxiv. 2020.  
38 doi:10.1101/2020.12.10.20247361  
39
- 40 42 McCulloh I, Kiernan K, Kent T. Inferring True COVID19 Infection Rates From Deaths. *Front Big*  
41 *Data* 2020;**3**. doi:10.3389/fdata.2020.565589  
42  
43  
44  
45

#### Figure 1 legend:

46  
47  
48 Figure 1: Location of the ten districts and seroprevalence (%) by district. Figures in parentheses indicate  
49 a 95% Confidence Interval for seroprevalence.  
50

#### Figure 2 legend:

51  
52  
53 Figure 2: Participant flow.  
54

#### Figure 3 legend:

55  
56  
57  
58 16  
59

1  
2  
3 Figure 3: A. Seropositivity by the history of COVID-19 like symptoms, RT-PCR testing, and test result. B.  
4 History of COVID-19 like symptoms by seropositivity, RT-PCR testing, and test result.  
5

6 **Figure 4 legend:**  
7

8 Figure 4: A. Daily cases and deaths in Kashmir since the start of the COVID-19 pandemic; B. Cumulative  
9 number of cases and deaths in Kashmir.  
10

11 **Figure 5 legend:**  
12

13 Figure 5: Cumulative estimated SARS-CoV-2 infections, reported cases, and deaths in Kashmir, October-  
14 November 2020. The bars represent the number of persons at each step. The percentages above the  
15 bars represent the percentage out of the total population. The percentages within the triangles  
16 represent percentages out of the previous step who proceed to the next step. (Adapted from Holtgrave  
17 DR, Barranco MA, Tesoriero JM, Blog DS, Rosenberg ES. Assessing racial and ethnic disparities using a  
18 COVID-19 outcomes continuum for New York State. *Ann Epidemiol.* 2020 Aug;48:9-14. doi:  
19 10.1016/j.annepidem.2020.06.010. Copyright 2020 Elsevier Inc.).  
20  
21  
22  
23  
24  
25  
26  
27  
28  
29  
30  
31  
32  
33  
34  
35  
36  
37  
38  
39  
40  
41  
42  
43  
44  
45  
46  
47  
48  
49  
50  
51  
52  
53  
54  
55  
56  
57  
58  
59  
60



1  
2  
3  
4  
5  
6  
7  
8  
9  
10  
11  
12  
13  
14  
15  
16  
17  
18  
19  
20  
21  
22  
23  
24  
25  
26  
27  
28  
29  
30  
31  
32  
33  
34  
35  
36  
37  
38  
39  
40



1  
2  
3  
4  
5  
6  
7  
8  
9  
10  
11  
12  
13  
14  
15  
16  
17  
18  
19  
20  
21  
22  
23  
24  
25  
26  
27  
28  
29  
30  
31  
32  
33  
34  
35  
36  
37  
38  
39  
40  
41

1  
2  
3  
4  
5  
6  
7  
8  
9  
10  
11  
12  
13  
14  
15  
16  
17  
18  
19  
20  
21  
22  
23  
24  
25  
26  
27  
28  
29  
30  
31  
32  
33  
34  
35  
36  
37  
38  
39  
40  
41  
42  
43  
44  
45  
46  
47  
48  
49  
50  
51  
52  
53  
54  
55  
56  
57  
58  
59  
60





### BMJ Open





Supplemental Table 1: Participant characteristics by district

| District  | Total | Age (years) |       |       |     | Gender |      | Residence |       |
|-----------|-------|-------------|-------|-------|-----|--------|------|-----------|-------|
|           |       | <30         | 30-49 | 50-69 | 70+ | Female | Male | Rural     | Urban |
| Anantnag  | 421   | 84          | 197   | 113   | 27  | 214    | 207  | 295       | 126   |
| Budgam    | 442   | 113         | 190   | 105   | 34  | 263    | 179  | 354       | 88    |
| Bandipora | 424   | 106         | 174   | 114   | 30  | 227    | 197  | 341       | 83    |
| Baramulla | 405   | 113         | 176   | 98    | 18  | 214    | 191  | 325       | 80    |
| Ganderbal | 442   | 92          | 210   | 123   | 17  | 233    | 209  | 346       | 96    |
| Kulgam    | 428   | 102         | 194   | 113   | 19  | 257    | 171  | 346       | 82    |
| Kupwara   | 400   | 81          | 171   | 105   | 43  | 215    | 185  | 360       | 40    |
| Pulwama   | 443   | 102         | 176   | 126   | 39  | 218    | 225  | 396       | 47    |
| Shopiyan  | 407   | 119         | 152   | 90    | 46  | 211    | 196  | 368       | 39    |
| Srinagar  | 2418  | 601         | 1032  | 656   | 129 | 1052   | 1366 | 233       | 2185  |
| Total     | 6230  | 1513        | 2672  | 1643  | 402 | 3104   | 3126 | 3364      | 2866  |

Supplemental Table 2: Seroprevalence (unadjusted) by district and participant characteristics

| District  | Overall          | Age (years)      |                  |                  |                  | Gender           |                  | Residence        |                  |
|-----------|------------------|------------------|------------------|------------------|------------------|------------------|------------------|------------------|------------------|
|           |                  | <30              | 30-49            | 50-69            | 70+              | Male             | Female           | Urban            | Rural            |
| Anantnag  | 35.2 (30.7-39.8) | 29.8 (21-40.4)   | 34.5 (28.2-41.4) | 38.9 (30.4-48.2) | 40.7 (24.2-59.7) | 36.2 (30-43)     | 34.1 (28.1-40.7) | 42.9 (34.5-51.6) | 31.9 (26.8-37.4) |
| Budgam    | 43 (38.4-47.7)   | 44.2 (35.4-53.5) | 37.9 (31.3-45)   | 48.6 (39.2-58.1) | 50 (33.8-66.2)   | 41.9 (34.9-49.3) | 43.7 (37.8-49.8) | 38.6 (29.1-49.2) | 44.1 (39-49.3)   |
| Bandipora | 39.6 (35.1-44.4) | 37.7 (29-47.3)   | 42 (34.8-49.4)   | 40.4 (31.8-49.6) | 30 (16.4-48.3)   | 37.6 (31.1-44.5) | 41.4 (35.2-47.9) | 55.4 (44.6-65.7) | 35.8 (30.9-41)   |
| Baramulla | 34.6 (30.1-39.3) | 27.4 (20-36.4)   | 32.4 (25.9-39.6) | 44.9 (35.4-54.8) | 44.4 (24-67)     | 39.3 (32.6-46.4) | 30.4 (24.6-36.9) | 36.3 (26.5-47.3) | 34.2 (29.2-39.5) |
| Ganderbal | 39.1 (34.7-43.8) | 34.8 (25.8-45)   | 40.5 (34-47.3)   | 39.8 (31.6-48.7) | 41.2 (21-64.8)   | 39.2 (32.8-46)   | 39.1 (33-45.5)   | 42.7 (33.2-52.8) | 38.2 (33.2-43.4) |
| Kulgam    | 28.5 (24.4-33)   | 27.5 (19.7-36.9) | 26.8 (21-33.5)   | 31 (23.1-40.1)   | 36.8 (18.7-59.7) | 25.1 (19.2-32.2) | 30.7 (25.4-36.6) | 37.8 (28-48.7)   | 26.3 (21.9-31.2) |
| Kupwara   | 42.3 (37.5-47.2) | 33.3 (24-44.2)   | 39.8 (32.7-47.3) | 50.5 (41-59.9)   | 48.8 (34.4-63.4) | 41.6 (34.7-48.9) | 42.8 (36.3-49.5) | 50 (35-65)       | 41.4 (36.4-46.6) |
| Pulwama   | 43.1 (38.6-47.8) | 35.3 (26.7-45)   | 42.6 (35.5-50)   | 45.2 (36.8-54)   | 59 (43.2-73.1)   | 39.6 (33.4-46.1) | 46.8 (40.3-53.4) | 40.4 (27.5-54.9) | 43.4 (38.6-48.4) |
| Shopiyan  | 31.9 (27.6-36.6) | 28.6 (21.2-37.3) | 29.6 (22.9-37.3) | 41.1 (31.4-51.5) | 30.4 (18.9-45.1) | 31.1 (25-37.9)   | 32.7 (26.7-39.3) | 38.5 (24.7-54.4) | 31.3 (26.7-36.2) |
| Srinagar  | 40.7 (38.8-42.7) | 39.1 (35.3-43.1) | 39.2 (36.3-42.3) | 41.9 (38.2-45.7) | 53.5 (44.9-61.9) | 37.7 (35.2-40.3) | 44.6 (41.6-47.6) | 40.8 (38.7-42.9) | 39.9 (33.8-46.3) |

### Chronic disease and SARS-CoV-2 infection in the study population

Of the 6230 participants, 1145 reported a history of at least one chronic disease. Two hundred ninety-eight reported a history of more than one chronic disease.

#### Supplementary Table 3: Chronic disease in the study population

| Chronic disease (n = 1145)            | Number (%)  |
|---------------------------------------|-------------|
| Hypertension                          | 815 (13.1%) |
| Diabetes                              | 314 (5.0%)  |
| Chronic Obstructive Pulmonary Disease | 39 (0.6%)   |
| Coronary Heart Disease                | 35 (0.6%)   |
| Cerebrovascular Disease               | 16 (0.3%)   |
| Asthma                                | 15 (0.2%)   |
| Chronic Kidney Disease                | 10 (0.2%)   |
| Chronic Liver Disease                 | 5 (0.1%)    |
| Cancer                                | 4 (0.1%)    |

**Supplementary Table 4: History of COVID-19 like symptoms and seropositivity vis-à-vis history of chronic disease**

|                                                        |              | History of COVID-19 like symptoms |      |
|--------------------------------------------------------|--------------|-----------------------------------|------|
|                                                        |              | Yes                               | No   |
| Reported history of chronic disease (n=1145)           | Seropositive | 78                                | 417  |
|                                                        | Seronegative | 63                                | 587  |
| Did not report any history of chronic disease (n=5085) | Seropositive | 169                               | 1751 |
|                                                        | Seronegative | 164                               | 3001 |

Of the 1154 participants who reported a history of chronic disease 78 (6.8%) reported a history of COVID-19 like symptoms within three months of the interview date and were seropositive for SARS-CoV-2 specific IgG (symptomatic infection). The proportion of symptomatic infection among participants who did not report any history of chronic disease was 3.3% (169/5085).

STROBE Statement—Checklist of items that should be included in reports of *cross-sectional studies*

|                              | Item No | Recommendation                                                                                                                                                                                    | Page No              |
|------------------------------|---------|---------------------------------------------------------------------------------------------------------------------------------------------------------------------------------------------------|----------------------|
| <b>Title and abstract</b>    | 1       | (a) Indicate the study's design with a commonly used term in the title or the abstract                                                                                                            | 1, 3                 |
|                              |         | (b) Provide in the abstract an informative and balanced summary of what was done and what was found                                                                                               | 2                    |
| <b>Introduction</b>          |         |                                                                                                                                                                                                   |                      |
| Background/rationale         | 2       | Explain the scientific background and rationale for the investigation being reported                                                                                                              | 3                    |
| Objectives                   | 3       | State specific objectives, including any prespecified hypotheses                                                                                                                                  | 3                    |
| <b>Methods</b>               |         |                                                                                                                                                                                                   |                      |
| Study design                 | 4       | Present key elements of study design early in the paper                                                                                                                                           | 3                    |
| Setting                      | 5       | Describe the setting, locations, and relevant dates, including periods of recruitment, exposure, follow-up, and data collection                                                                   | 3 and Figure 1       |
| Participants                 | 6       | (a) Give the eligibility criteria, and the sources and methods of selection of participants                                                                                                       | 3, 4                 |
| Variables                    | 7       | Clearly define all outcomes, exposures, predictors, potential confounders, and effect modifiers. Give diagnostic criteria, if applicable                                                          | 4                    |
| Data sources/<br>measurement | 8*      | For each variable of interest, give sources of data and details of methods of assessment (measurement). Describe comparability of assessment methods if there is more than one group              | 4                    |
| Bias                         | 9       | Describe any efforts to address potential sources of bias                                                                                                                                         | 4, 5                 |
| Study size                   | 10      | Explain how the study size was arrived at                                                                                                                                                         | 3                    |
| Quantitative variables       | 11      | Explain how quantitative variables were handled in the analyses. If applicable, describe which groupings were chosen and why                                                                      | 4                    |
| Statistical methods          | 12      | (a) Describe all statistical methods, including those used to control for confounding                                                                                                             | 4, 5                 |
|                              |         | (b) Describe any methods used to examine subgroups and interactions                                                                                                                               | 5                    |
|                              |         | (c) Explain how missing data were addressed                                                                                                                                                       | 5                    |
|                              |         | (d) If applicable, describe analytical methods taking account of sampling strategy                                                                                                                | 4, 5                 |
|                              |         | (e) Describe any sensitivity analyses                                                                                                                                                             | 6, Table 3           |
| <b>Results</b>               |         |                                                                                                                                                                                                   |                      |
| Participants                 | 13*     | (a) Report numbers of individuals at each stage of study—eg numbers potentially eligible, examined for eligibility, confirmed eligible, included in the study, completing follow-up, and analysed | Figure 2, and page 5 |
|                              |         | (b) Give reasons for non-participation at each stage                                                                                                                                              | Figure 2             |
|                              |         | (c) Consider use of a flow diagram                                                                                                                                                                | Figure 2             |
| Descriptive data             | 14*     | (a) Give characteristics of study participants (eg demographic, clinical, social) and information on exposures and potential confounders                                                          | Table 1              |
|                              |         | (b) Indicate number of participants with missing data for each variable of interest                                                                                                               | Table 1, Figure 2    |
| Outcome data                 | 15*     | Report numbers of outcome events or summary measures                                                                                                                                              | Table 2              |

|    |                          |    |                                                                                                                                                                                                              |                  |
|----|--------------------------|----|--------------------------------------------------------------------------------------------------------------------------------------------------------------------------------------------------------------|------------------|
| 1  |                          |    |                                                                                                                                                                                                              |                  |
| 2  | Main results             | 16 | (a) Give unadjusted estimates and, if applicable, confounder-adjusted estimates and their precision (eg, 95% confidence interval). Make clear which confounders were adjusted for and why they were included | Table 2          |
| 3  |                          |    |                                                                                                                                                                                                              |                  |
| 4  |                          |    |                                                                                                                                                                                                              |                  |
| 5  |                          |    |                                                                                                                                                                                                              |                  |
| 6  |                          |    |                                                                                                                                                                                                              |                  |
| 7  |                          |    | (b) Report category boundaries when continuous variables were categorized                                                                                                                                    | Table 1, 2       |
| 8  |                          |    |                                                                                                                                                                                                              |                  |
| 9  |                          |    |                                                                                                                                                                                                              |                  |
| 10 |                          |    | (c) If relevant, consider translating estimates of relative risk into absolute risk for a meaningful time period                                                                                             | -                |
| 11 |                          |    |                                                                                                                                                                                                              |                  |
| 12 | Other analyses           | 17 | Report other analyses done—eg analyses of subgroups and interactions, and sensitivity analyses                                                                                                               | Table 2, Table 3 |
| 13 |                          |    |                                                                                                                                                                                                              |                  |
| 14 |                          |    |                                                                                                                                                                                                              |                  |
| 15 | <b>Discussion</b>        |    |                                                                                                                                                                                                              |                  |
| 16 | Key results              | 18 | Summarise key results with reference to study objectives                                                                                                                                                     | 9                |
| 17 |                          |    |                                                                                                                                                                                                              |                  |
| 18 | Limitations              | 19 | Discuss limitations of the study, taking into account sources of potential bias or imprecision. Discuss both direction and magnitude of any potential bias                                                   | 11, 12           |
| 19 |                          |    |                                                                                                                                                                                                              |                  |
| 20 |                          |    |                                                                                                                                                                                                              |                  |
| 21 | Interpretation           | 20 | Give a cautious overall interpretation of results considering objectives, limitations, multiplicity of analyses, results from similar studies, and other relevant evidence                                   | 9, 10, 11        |
| 22 |                          |    |                                                                                                                                                                                                              |                  |
| 23 |                          |    |                                                                                                                                                                                                              |                  |
| 24 |                          |    |                                                                                                                                                                                                              |                  |
| 25 | Generalisability         | 21 | Discuss the generalisability (external validity) of the study results                                                                                                                                        | 11               |
| 26 |                          |    |                                                                                                                                                                                                              |                  |
| 27 | <b>Other information</b> |    |                                                                                                                                                                                                              |                  |
| 28 | Funding                  | 22 | Give the source of funding and the role of the funders for the present study and, if applicable, for the original study on which the present article is based                                                | 12               |
| 29 |                          |    |                                                                                                                                                                                                              |                  |
| 30 |                          |    |                                                                                                                                                                                                              |                  |
| 31 |                          |    |                                                                                                                                                                                                              |                  |
| 32 |                          |    |                                                                                                                                                                                                              |                  |

\*Give information separately for exposed and unexposed groups.

# BMJ Open

## Seroprevalence of SARS-CoV-2 specific IgG antibodies in Kashmir, India, seven months after the first reported local COVID-19 case: results of a population-based seroprevalence survey from October-November, 2020

|                               |                                                                                                                                                                                                                                                                                                                                                                                                                                                                                                                                                                                                                                                                                                                                                                                                                                                                                                                                                                                                                                                                                                                                                                                                                                                                                                                                                                                                                                                                                                                                                                                                                                                                                                                                                                                                                                                                           |
|-------------------------------|---------------------------------------------------------------------------------------------------------------------------------------------------------------------------------------------------------------------------------------------------------------------------------------------------------------------------------------------------------------------------------------------------------------------------------------------------------------------------------------------------------------------------------------------------------------------------------------------------------------------------------------------------------------------------------------------------------------------------------------------------------------------------------------------------------------------------------------------------------------------------------------------------------------------------------------------------------------------------------------------------------------------------------------------------------------------------------------------------------------------------------------------------------------------------------------------------------------------------------------------------------------------------------------------------------------------------------------------------------------------------------------------------------------------------------------------------------------------------------------------------------------------------------------------------------------------------------------------------------------------------------------------------------------------------------------------------------------------------------------------------------------------------------------------------------------------------------------------------------------------------|
| Journal:                      | <i>BMJ Open</i>                                                                                                                                                                                                                                                                                                                                                                                                                                                                                                                                                                                                                                                                                                                                                                                                                                                                                                                                                                                                                                                                                                                                                                                                                                                                                                                                                                                                                                                                                                                                                                                                                                                                                                                                                                                                                                                           |
| Manuscript ID                 | bmjopen-2021-053791.R4                                                                                                                                                                                                                                                                                                                                                                                                                                                                                                                                                                                                                                                                                                                                                                                                                                                                                                                                                                                                                                                                                                                                                                                                                                                                                                                                                                                                                                                                                                                                                                                                                                                                                                                                                                                                                                                    |
| Article Type:                 | Original research                                                                                                                                                                                                                                                                                                                                                                                                                                                                                                                                                                                                                                                                                                                                                                                                                                                                                                                                                                                                                                                                                                                                                                                                                                                                                                                                                                                                                                                                                                                                                                                                                                                                                                                                                                                                                                                         |
| Date Submitted by the Author: | 04-Sep-2021                                                                                                                                                                                                                                                                                                                                                                                                                                                                                                                                                                                                                                                                                                                                                                                                                                                                                                                                                                                                                                                                                                                                                                                                                                                                                                                                                                                                                                                                                                                                                                                                                                                                                                                                                                                                                                                               |
| Complete List of Authors:     | <p>Khan, S Muhammad; Government Medical College Srinagar, Community Medicine</p> <p>Qurieshi, Mariya; Government Medical College Srinagar, Community Medicine</p> <p>Haq, Inaamul; Government Medical College Srinagar, Community Medicine</p> <p>Majid, Sabhiya; Government Medical College Srinagar, Biochemistry</p> <p>Ahmad, Javid; Sher-i-Kashmir Institute of Medical Sciences, Community Medicine</p> <p>Ayub, Taha; Government Medical College Srinagar, Community Medicine</p> <p>Bhat, Ashfaq; SKIMS Medical College Srinagar, Community Medicine</p> <p>Fazili, Anjum; Sher-i-Kashmir Institute of Medical Sciences, Community Medicine</p> <p>Ganai, Abdul; Government Medical College Baramulla, Community Medicine</p> <p>Jan, Yasmeen; SKIMS Medical College Srinagar, Community Medicine</p> <p>Kaul, Rauf-ur-Rashid; Sher-i-Kashmir Institute of Medical Sciences, Community Medicine</p> <p>Khan, Zahid; Government Medical College Baramulla, Community Medicine</p> <p>Masoodi, Muneer; Government Medical College Anantnag, Community Medicine</p> <p>Mushtaq, Beenish; SKIMS Medical College Srinagar, Community Medicine</p> <p>Nazir, Fouzia; Government Medical College Anantnag, Community Medicine</p> <p>Nazir, Muzamil; Government Medical College Baramulla, Community Medicine</p> <p>Raja, Malik; Government Medical College Srinagar, Community Medicine</p> <p>Rasool, Mahbooba; Government Medical College Anantnag, Community Medicine</p> <p>Asma, Anjum; Government Medical College Srinagar, Community Medicine</p> <p>Ayoub, Shifana; Government Medical College Srinagar, Community Medicine</p> <p>Aziz, Munazza; Government of Jammu and Kashmir Directorate of Health Services</p> <p>Bhat, Arif; Government Medical College Srinagar, Biochemistry</p> <p>Chowdri, Iqra; Government Medical College Srinagar, Community</p> |



|                                    |                                                                                                                                                                                                                                                                                                                                                                                                                                                                                                                                                                                                                                                                                                                                                                                                                                                                     |
|------------------------------------|---------------------------------------------------------------------------------------------------------------------------------------------------------------------------------------------------------------------------------------------------------------------------------------------------------------------------------------------------------------------------------------------------------------------------------------------------------------------------------------------------------------------------------------------------------------------------------------------------------------------------------------------------------------------------------------------------------------------------------------------------------------------------------------------------------------------------------------------------------------------|
|                                    | Medicine<br>Ismail, Shaista; Government Medical College Srinagar, Community<br>Medicine<br>Kawoosa, Misbah; Government Medical College Srinagar, Community<br>Medicine<br>Khan, Mehvish; Government Medical College Srinagar, Community<br>Medicine<br>Khan, Mosin; Government Medical College Srinagar, Biochemistry<br>Kousar, Rafiya; Government Medical College Srinagar, Community<br>Medicine<br>Lone, Ab; Government Medical College Srinagar, Community Medicine<br>Nabi, Shahroz; Government Medical College Srinagar, Community<br>Medicine<br>Obaid, Mohammad; Government Medical College Srinagar, Biochemistry<br>Qazi, Tanzeela; Government Medical College Srinagar, Community<br>Medicine<br>Sabah, Iram; Government Medical College Srinagar, Community<br>Medicine<br>Sumji, Ishtiyag; Government Medical College Srinagar, Community<br>Medicine |
| <b>Primary Subject<br>Heading</b>: | Infectious diseases                                                                                                                                                                                                                                                                                                                                                                                                                                                                                                                                                                                                                                                                                                                                                                                                                                                 |
| Secondary Subject Heading:         | Epidemiology                                                                                                                                                                                                                                                                                                                                                                                                                                                                                                                                                                                                                                                                                                                                                                                                                                                        |
| Keywords:                          | COVID-19, EPIDEMIOLOGY, Epidemiology < INFECTIOUS DISEASES                                                                                                                                                                                                                                                                                                                                                                                                                                                                                                                                                                                                                                                                                                                                                                                                          |
|                                    |                                                                                                                                                                                                                                                                                                                                                                                                                                                                                                                                                                                                                                                                                                                                                                                                                                                                     |

SCHOLARONE™  
Manuscripts



I, the Submitting Author has the right to grant and does grant on behalf of all authors of the Work (as defined in the below author licence), an exclusive licence and/or a non-exclusive licence for contributions from authors who are: i) UK Crown employees; ii) where BMJ has agreed a CC-BY licence shall apply, and/or iii) in accordance with the terms applicable for US Federal Government officers or employees acting as part of their official duties; on a worldwide, perpetual, irrevocable, royalty-free basis to BMJ Publishing Group Ltd ("BMJ") its licensees and where the relevant Journal is co-owned by BMJ to the co-owners of the Journal, to publish the Work in this journal and any other BMJ products and to exploit all rights, as set out in our [licence](#).

The Submitting Author accepts and understands that any supply made under these terms is made by BMJ to the Submitting Author unless you are acting as an employee on behalf of your employer or a postgraduate student of an affiliated institution which is paying any applicable article publishing charge ("APC") for Open Access articles. Where the Submitting Author wishes to make the Work available on an Open Access basis (and intends to pay the relevant APC), the terms of reuse of such Open Access shall be governed by a Creative Commons licence – details of these licences and which [Creative Commons](#) licence will apply to this Work are set out in our licence referred to above.

Other than as permitted in any relevant BMJ Author's Self Archiving Policies, I confirm this Work has not been accepted for publication elsewhere, is not being considered for publication elsewhere and does not duplicate material already published. I confirm all authors consent to publication of this Work and authorise the granting of this licence.

1  
2  
3 **Seroprevalence of SARS-CoV-2 specific IgG antibodies in Kashmir, India, seven months after the first**  
4 **reported local COVID-19 case: results of a population-based seroprevalence survey from October-**  
5 **November, 2020**  
6

7 S Muhammad Salim Khan,<sup>1</sup> Mariya Amin Qurieshi,<sup>1</sup> Inaamul Haq,<sup>1</sup> Sabhiya Majid,<sup>2</sup> Javid Ahmad,<sup>3\*</sup> Taha  
8 Ayub,<sup>1\*</sup> Ashfaq Ahmad Bhat,<sup>4\*</sup> Anjum Bashir Fazili,<sup>3\*</sup> Abdul Majeed Ganai,<sup>5\*</sup> Yasmeen Jan,<sup>4\*</sup> Rauf-ur-  
9 Rashid Kaul,<sup>3\*</sup> Zahid Ali Khan,<sup>5\*</sup> Muneer Ahmad Masoodi,<sup>6\*</sup> Beenish Mushtaq,<sup>4\*</sup> Fouzia Nazir,<sup>6\*</sup> Muzamil  
10 Nazir,<sup>5\*</sup> Malik Waseem Raja,<sup>1\*</sup> Mahbooba Rasool,<sup>6\*</sup> Anjum Asma,<sup>1†</sup> Shifana Ayoub,<sup>1†</sup> Munazza Aziz,<sup>7†</sup> Arif  
11 Akbar Bhat,<sup>2†</sup> Iqra Nisar Chowdri,<sup>1†</sup> Shaista Ismail,<sup>1†</sup> Misbah Ferooz Kawoosa,<sup>1†</sup> Mehvish Afzal Khan,<sup>1†</sup>  
12 Mosin Saleem Khan,<sup>2†</sup> Rafiya Kousar,<sup>1†</sup> Ab Aziz Lone,<sup>1†</sup> Shahroz Nabi,<sup>1†</sup> Mohammad Obaid,<sup>1†</sup> Tanzeela  
13 Bashir Qazi,<sup>1†</sup> Iram Sabah,<sup>1†</sup> Ishtiyah Ahmad Sumji<sup>1†</sup>  
14

15  
16 \*Authors in alphabetical order, Contributed equally

17  
18 †Authors in alphabetical order, Contributed equally

19  
20 Corresponding author:

21  
22 Dr. Inaamul Haq, Department of Community Medicine, Government Medical College, Srinagar, Jammu &  
23 Kashmir, 190010, India. Email: [haqinaam@yahoo.co.in](mailto:haqinaam@yahoo.co.in)  
24

25 Affiliation

26  
27 <sup>1</sup> Department of Community Medicine, Government Medical College Srinagar, Jammu & Kashmir, India

28  
29 <sup>2</sup> Department of Biochemistry, Government Medical College Srinagar, Jammu & Kashmir, India

30  
31 <sup>3</sup> Department of Community Medicine, Sher-i-Kashmir Institute of Medical Sciences, Srinagar, Jammu &  
32 Kashmir, India

33  
34 <sup>4</sup> Department of Community Medicine, SKIMS Medical College, Srinagar, Jammu & Kashmir, India

35  
36 <sup>5</sup> Department of Community Medicine, Government Medical College Baramulla, Jammu & Kashmir, India

37  
38 <sup>6</sup> Department of Community Medicine, Government Medical College Anantnag, Jammu & Kashmir, India

39  
40 <sup>7</sup> Directorate of Health Services Kashmir, Government of Jammu & Kashmir, India

41  
42 Word Count: 3727 (excluding abstract, tables, and references)  
43  
44  
45  
46  
47  
48  
49  
50  
51  
52  
53  
54  
55  
56  
57  
58  
59  
60

## ABSTRACT

**Objectives:** We designed a population-based survey in Kashmir to estimate the seroprevalence of SARS-CoV-2 specific IgG antibodies in the general population aged 18 years and above.

**Setting:** The survey was conducted among 110 villages and urban wards across ten districts in Kashmir from 17 Oct 2020 to 04 Nov 2020.

**Participants:** Individuals aged 18 years and above were eligible to be included in the survey. Serum samples were tested for the presence of SARS-CoV-2 specific IgG antibodies using the Abbott SARS-CoV-2 IgG assay.

**Primary and secondary outcome measures:** We labeled assay results equal to or above the cut-off index value of 1.4 as positive for SARS-CoV-2 specific IgG antibodies. Seroprevalence estimates were adjusted for the sampling design and assay characteristics.

**Results:** Out of 6397 eligible individuals enumerated, 6315 (98.7%) agreed to participate. The final analysis was done on 6230 participants. Seroprevalence adjusted for the sampling design and assay characteristics was 36.7% (95% CI 34.3%-39.2%). Seroprevalence was higher among the older population. Among seropositive individuals, 10.2% (247/2415) reported a history of COVID-19 like symptoms. Out of 474 symptomatic individuals, 233 (49.2%) reported having been tested. We estimated an infection fatality rate of 0.034%.

**Conclusions:** During the first seven months of the COVID-19 epidemic in Kashmir valley, approximately 37% of individuals were infected. The reported number of COVID-19 cases was only a small fraction of the estimated number of infections. A more efficient surveillance system with strengthened reporting of COVID-19 cases and deaths is warranted.

## ARTICLE SUMMARY

### Strengths and limitations of this study

- The findings of our study are based on a representative sample of the population.
- The laboratory test used for the detection of SARS-CoV-2 specific IgG antibodies in serum samples provides valid results.
- We report seroprevalence estimates adjusted for sampling design and test performance.
- Even though we adjusted the weighted seroprevalence estimates for test performance using manufacturer-provided sensitivity and specificity (100% and 99.63%, respectively), we did not quantify the test validity in-house.
- Because of lack of age- and gender-specific mortality data, we could not estimate age- and gender-specific infection fatality rates.

## INTRODUCTION

On 11 Feb 2020, the World Health Organization announced that the disease caused by the Severe Acute Respiratory Syndrome Coronavirus 2 (SARS-CoV-2) would be named coronavirus disease (COVID-19).[1] In Kashmir, the first case of COVID-19 was confirmed in Srinagar city on 18 Mar 2020.[2] The government imposed the first phase of the lockdown in Kashmir on 24 March 2020. During this phase, inter-state travel remained suspended. People were barred from moving outside except in an

1  
2  
3 emergency. Except for essential services, all government and private offices were advised to work from  
4 home. Universal masking was made mandatory. The lockdown was extended till 31 May 2020 and later  
5 relaxed in a phased manner.  
6

7 Mild or asymptomatic infections are common in Coronavirus disease 2019 (COVID-19) and are an  
8 important source of infection transmission.[3,4] Such cases are less likely to be detected by a  
9 surveillance system based on reverse-transcriptase polymerase chain reaction (RT-PCR) testing.  
10 Therefore, the number of reported RT-PCR positive cases are an underestimate of the true number of  
11 infections in a population.  
12  
13

14 Seroprevalence surveys have been conducted in various countries at different stages of the current  
15 epidemic among various population groups.[5–14] Seroprevalence surveys provide a more accurate  
16 estimate of past infection, improve understanding of the infection transmission dynamics, and guide  
17 public health response.[15]  
18

19 We designed this survey with the primary objective to estimate the seroprevalence of severe acute  
20 respiratory syndrome coronavirus 2 (SARS-CoV-2) specific IgG antibodies in the adult population of  
21 Kashmir valley.  
22  
23

## 24 **METHODS**

25  
26 We designed a population-based cross-sectional study. The study covered all the ten districts of  
27 Kashmir, a valley in northern India. (Figure 1) We completed data collection in three weeks, from 17 Oct  
28 2020 to 04 Nov 2020.  
29

### 30 **Ethics**

31  
32 We obtained written informed consent from all study participants. The study was approved by the  
33 Institutional Ethics Committee of Government Medical College Srinagar (reference number:  
34 1004/ETH/GMC). We used anonymized participant data for analysis.  
35

### 36 **Sample size**

37  
38 Based on the results of a previous study conducted in July 2020, we speculated that, by October 2020,  
39 the prevalence would have increased to around 20%.[16] We calculated the minimum sample size based  
40 on an anticipated seroprevalence of 20%, an absolute precision of 2%, and a design effect of 2. We used  
41 OpenEpi to make sample size calculations.[17] We adjusted the sample size for a possible non-response  
42 of 10% to obtain a minimum size of 3376. We decided to select 3600 individuals from nine of the ten  
43 districts (except district Srinagar). To obtain precise estimates for district Srinagar, sample size  
44 estimation was made for the district separately. We used a design effect of 1.5, an anticipated  
45 seroprevalence of 20%, and absolute precision of 2% to obtain a sample size of 2302 for the district,  
46 further increasing to 2400 to account for non-response. We thus targeted a total sample size of 6000  
47 (3600 + 2400).  
48  
49  
50

### 51 **Participants**

52  
53 All adults  $\geq 18$  years of age were eligible to participate in the study. We selected eligible participants  
54 using a three-stage stratified cluster sampling technique. We listed all clusters in the valley using the  
55 Census 2011 data.[18] Within each of the ten districts in the valley, clusters were stratified into urban  
56  
57

1  
2  
3 and rural clusters. We selected clusters within each of the 20 strata by probability proportionate to size  
4 (PPS) sampling. Except for district Srinagar which we oversampled to obtain precise seroprevalence  
5 estimates for, ten clusters were randomly selected from each district. We selected 20 clusters from  
6 district Srinagar. We divided each selected cluster into four equal areas and chose a central location  
7 within each of the four areas as the starting point. Thereafter, we approached consecutive households  
8 to enroll at least ten eligible participants. We thus identified a total of 440 random locations within 110  
9 clusters in ten districts. We invited all eligible adults in a household for participation.  
10  
11

## 12 **Variables**

13  
14 The primary outcome variable of interest was SARS-CoV-2 specific IgG antibodies. In addition, we  
15 obtained information from participants about their age, gender, history of COVID-19 like symptoms in  
16 the three months before the interview date, history of contact with a known COVID-19 patient, and  
17 history of COVID-19 testing.  
18  
19

## 20 **Procedure**

21 We informed eligible adults about the purpose and the procedure of the study. Study participation was  
22 voluntary. Participants were interviewed by health personnel specifically trained for the interview.  
23 Interview responses were recorded in an Epicollect5 form.[19] Once the interview was completed, a  
24 trained phlebotomist collected 3-5 mL of venous blood from the antecubital vein under aseptic  
25 precautions into a red-top collection tube containing a clot activator. The tube was left standing,  
26 undisturbed, for at least 30 minutes for clot formation. The sample was later transported to a central  
27 facility for centrifugation. Centrifuged samples were transported to a central laboratory for further  
28 processing and analysis. Serum samples were tested for the presence of SARS-CoV-2 specific IgG  
29 antibodies using the Abbott SARS-CoV-2 IgG assay. The assay uses chemiluminescence to detect IgG  
30 antibodies against the SARS-CoV-2 nucleocapsid protein. The reported sensitivity and specificity of the  
31 assay are 100% (95% CI 95.89-100.00) and 99.63% (99.05-99.90), respectively.[20] As recommended by  
32 the manufacturer, we labeled assay results equal to or above the cut-off index value of 1.4 as positive  
33 for SARS-CoV-2 specific IgG antibodies.  
34  
35  
36  
37

## 38 **Statistical methods**

39 We report unweighted seroprevalence estimates in percentages. We used the Agresti-Coull procedure  
40 to calculate a 95% confidence interval (CI) for seroprevalence estimates.[21] A weighted estimate of  
41 seroprevalence is provided. To calculate survey weights (inverse of sampling probability), we used the  
42 estimated population of the districts. We used the census 2011 data and growth rates from Sample  
43 Registration System to estimate the population of the districts in 2020.[18,22] Survey weights obtained  
44 were further adjusted for non-response and age and sex structure (post-stratification weights). We  
45 further adjusted the weighted seroprevalence estimates for test performance to calculate “weighted  
46 seroprevalence adjusted for test performance”. We did this using the formula:  
47  
48

49 *Weighted seroprevalence adjusted for test performance =*  
50 *(Weighted seroprevalence + Test specificity – 1)/(Test sensitivity + Test specificity – 1).[23]*  
51

52 We used the manufacturer-provided sensitivity and specificity in the above formula.[20] We used the  
53 extremes of the manufacturer-provided 95% CI of the test sensitivity and specificity (upper limit of  
54  
55  
56  
57

sensitivity, lower limit of specificity; and lower limit of sensitivity, upper limit of specificity) to report sensitivity analyses.

We analyzed the difference in seroprevalence estimates across levels of a categorical variable using a Chi-square test adjusted for the sampling design.

We estimated the number of SARS-CoV-2 infections by multiplying the weighted seroprevalence adjusted for test performance with the estimated population of the valley. To estimate the number of infections per reported case, we divided the estimated number of SARS-CoV-2 infections by the reported number of COVID-19 cases two weeks before the survey date. We calculated the infection fatality rate by dividing the reported number of deaths by the number of estimated infections, assuming a three-week lag time from infection to death.[24]

We analyzed the data using Stata version 15 (StataCorp. 2017. Stata Statistical Software: Release 15. College Station, TX: StataCorp LP.).

### Patient and Public Involvement

No patients or members of the public were involved in this study.

### RESULTS

We enumerated 6 397 individuals  $\geq 18$  years from 3 077 households and 110 clusters (34 urban clusters and 76 rural clusters) between 17 Oct 2020 and 04 Nov 2020. Of the 6 397 eligible individuals, 6 315 (98.7%) agreed to participate and were enrolled. The final analysis was done on a sample of 6 230 participants. (Figure 2)

Of the 6 230 participants, 1 513 (24.3%) were between 18 and 30 years of age, 2 672 (42.9%) were aged 30-49 years, 1 643 (26.4%) were aged 50-69 years, and 402 (6.4%) were 70 years and older. (Table 1). There was equal representation from males and females, and 3 364 (54.0%) resided in a rural area. Of the 3 104 females, 56 (1.8%) reported being pregnant at the time of the survey. Four hundred seventy-four (7.6%) reported COVID-19 like symptoms in the three months preceding the survey, and 439 (7.0%) reported to have ever come in contact with a known COVID-19 case. One thousand ninety-two (17.5%) reported having been tested for COVID-19 using RT-PCR or a Rapid Antigen Test (RAT) previously, of whom 176 (16.2%) reported to have tested positive for the disease.

**Table 1: Characteristics of study participants**

|                   | Frequency | Percent |
|-------------------|-----------|---------|
| <b>Total</b>      | 6230      |         |
| <b>Age, years</b> |           |         |
| 18-29             | 1513      | 24.3    |
| 30-49             | 2672      | 42.9    |
| 50-69             | 1643      | 26.4    |
| $\geq 70$         | 402       | 6.5     |
| <b>Gender</b>     |           |         |
| Male              | 3126      | 50.2    |
| Female            | 3104      | 49.8    |

|                                                      |      |      |
|------------------------------------------------------|------|------|
| <b>Residence</b>                                     |      |      |
| Urban                                                | 2866 | 46.0 |
| Rural                                                | 3364 | 54.0 |
| <b>Pregnant (n=3104)</b>                             | 56   | 1.8  |
| <b>Self-reported history of chronic disease</b>      | 1145 | 18.4 |
| <b>History of COVID-19 like symptoms</b>             | 474  | 7.6  |
| <b>History of contact with a known COVID-19 case</b> | 439  | 7.0  |
| <b>Ever tested for COVID-19 (RT-PCR)</b>             | 1092 | 17.5 |
| <b>RT-PCR result (n=1088*)</b>                       |      |      |
| Positive                                             | 176  | 16.2 |
| Negative                                             | 912  | 83.8 |

COVID-19: Coronavirus disease; RT-PCR: Reverse transcriptase-polymerase chain reaction

\*RT-PCR result not known in four participants

We found an overall unweighted seroprevalence of 38.8% (95% CI 37.6 – 40.0). The seroprevalence ranged from 28.5% in district Kulgam to 43.1% in district Pulwama. (Figure 1 and online supplemental file 1) The overall weighted seroprevalence (adjusted for sampling design) was 36.9% (95% CI 34.5 – 39.4). The weighted seroprevalence adjusted for test performance was 36.7% (95% CI 34.3 – 39.2). (Table 2) Upon sensitivity analyses, the weighted seroprevalence adjusted for test performance ranged from 36.3% (95% CI 33.9 – 38.8) to 38.4% (95% CI 35.9 – 41.0). (Table 3)

**Table 2: Seroprevalence of SARS-CoV-2 specific IgG antibodies by participant characteristics**

|                   | Number tested | Number seropositive | Unweighted seroprevalence, % (95% CI) | Weighted seroprevalence, % (95% CI) | Weighted seroprevalence adjusted for test performance, % (95% CI) | Design-based F, p-value |
|-------------------|---------------|---------------------|---------------------------------------|-------------------------------------|-------------------------------------------------------------------|-------------------------|
| <b>Total</b>      | 6230          | 2415                | 38.8 (37.6-40.0)                      | 36.9 (34.5-39.4)                    | 36.7 (34.3-39.2)                                                  |                         |
| <b>Age, years</b> |               |                     |                                       |                                     |                                                                   |                         |
| 18-29             | 1513          | 538                 | 35.6 (33.2-38.0)                      | 33.7 (30.1-37.6)                    | 33.5 (29.8-37.4)                                                  | 6.42, 0.0006            |
| 30-49             | 2672          | 1000                | 37.4 (35.6-39.3)                      | 36.3 (33.5-39.3)                    | 36.1 (33.3-39.1)                                                  |                         |
| 50-69             | 1643          | 691                 | 42.1 (39.7-44.5)                      | 42.5 (38.8-46.2)                    | 42.3 (38.6-46.0)                                                  |                         |
| ≥70               | 402           | 186                 | 46.3 (41.5-51.2)                      | 45.3 (37.8-53.0)                    | 45.1 (37.6-52.8)                                                  |                         |
| <b>Gender</b>     |               |                     |                                       |                                     |                                                                   |                         |
| Male              | 3126          | 1166                | 37.3 (35.6-39.0)                      | 36.1 (33.5-38.9)                    | 35.9 (33.3-38.7)                                                  | 0.94, 0.34              |
| Female            | 3104          | 1249                | 40.2 (38.5-42.0)                      | 37.8 (34.5-41.3)                    | 37.6 (34.3-41.1)                                                  |                         |
| <b>Residence</b>  |               |                     |                                       |                                     |                                                                   |                         |
| Urban             | 2866          | 1180                | 41.2 (39.4-43.0)                      | 40.2 (36.3-44.1)                    | 40.0 (36.1-43.9)                                                  | 3.43, 0.07              |



|                                                      |      |      |                  |                  |                  |                |
|------------------------------------------------------|------|------|------------------|------------------|------------------|----------------|
| Rural                                                | 3364 | 1235 | 36.7 (35.1-38.4) | 35.5 (32.5-38.7) | 35.3 (32.2-38.5) |                |
| <b>Self-reported history of chronic disease</b>      |      |      |                  |                  |                  |                |
| Yes                                                  | 1145 | 495  | 43.2 (40.4-46.1) | 41.9 (37.4-46.6) | 41.7 (37.2-46.4) | 6.14, 0.02     |
| No                                                   | 5085 | 1920 | 37.8 (36.4-39.1) | 36.2 (33.7-38.9) | 36.0 (33.5-38.7) |                |
| <b>History of COVID-19 like symptoms</b>             |      |      |                  |                  |                  |                |
| Yes                                                  | 474  | 247  | 52.1 (47.6-56.6) | 47.4 (37.9-57.1) | 47.2 (37.7-56.9) | 5.53, 0.02     |
| No                                                   | 5756 | 2168 | 37.7 (36.4-38.9) | 36.3 (33.9-38.8) | 36.1 (33.7-38.6) |                |
| <b>History of contact with a known COVID-19 case</b> |      |      |                  |                  |                  |                |
| Yes                                                  | 439  | 219  | 49.9 (45.2-54.5) | 45.2 (38.3-52.2) | 45.0 (38.1-52.0) | 7.13, 0.01     |
| No                                                   | 5791 | 2196 | 37.9 (36.7-39.2) | 36.5 (34.1-39.0) | 36.3 (33.9-38.8) |                |
| <b>Ever tested for COVID-19 (RT-PCR)</b>             |      |      |                  |                  |                  |                |
| Yes                                                  | 1092 | 485  | 44.4 (41.5-47.4) | 41.0 (35.4-46.9) | 40.8 (35.2-46.7) | 2.17, 0.14     |
| No                                                   | 5138 | 1930 | 37.6 (36.2-38.9) | 36.2 (33.5-39.0) | 36.0 (33.3-38.8) |                |
| <b>RT-PCR result (n=1088*)</b>                       |      |      |                  |                  |                  |                |
| Positive                                             | 176  | 140  | 79.5 (73.0-84.9) | 81.8 (74.8-87.1) | 81.7 (74.7-87.1) | 74.93, <0.0001 |
| Negative                                             | 912  | 345  | 37.8 (34.7-41.0) | 38.8 (33.3-44.7) | 38.6 (33.1-44.5) |                |

COVID-19: Coronavirus disease; RT-PCR: Reverse transcriptase-polymerase chain reaction

\*RT-PCR result not known in four participants

**Table 3: Sensitivity analyses for seroprevalence at extremes of test performance**

|                   | Weighted seroprevalence, % (95% CI) | Weighted seroprevalence adjusted for test performance, % (95% CI)<br>[Sensitivity 100.00%, Specificity 99.63%] | Weighted seroprevalence adjusted for test performance, % (95% CI)<br>[Sensitivity 95.89%, Specificity 99.90%] | Weighted seroprevalence adjusted for test performance, % (95% CI)<br>[Sensitivity 100.00%, Specificity 99.05%] |
|-------------------|-------------------------------------|----------------------------------------------------------------------------------------------------------------|---------------------------------------------------------------------------------------------------------------|----------------------------------------------------------------------------------------------------------------|
| <b>Overall</b>    | 36.9 (34.5-39.4)                    | 36.7 (34.3-39.2)                                                                                               | 38.4 (35.9-41.0)                                                                                              | 36.3 (33.9-38.8)                                                                                               |
| <b>Age, years</b> |                                     |                                                                                                                |                                                                                                               |                                                                                                                |
| 18-29             | 33.7 (30.1-37.6)                    | 33.5 (29.8-37.4)                                                                                               | 35.1 (31.3-39.1)                                                                                              | 33.1 (29.4-37.0)                                                                                               |

7

|                                                      |                  |                  |                  |                  |
|------------------------------------------------------|------------------|------------------|------------------|------------------|
| 30-49                                                | 36.3 (33.5-39.3) | 36.1 (33.3-39.1) | 37.8 (34.9-40.9) | 35.7 (32.9-38.7) |
| 50-69                                                | 42.5 (38.8-46.2) | 42.3 (38.6-46.0) | 44.3 (40.4-48.1) | 41.9 (38.2-45.7) |
| ≥70                                                  | 45.3 (41.8-48.8) | 45.1 (41.6-48.6) | 47.2 (43.5-50.9) | 44.8 (41.3-48.3) |
| <b>Gender</b>                                        |                  |                  |                  |                  |
| Male                                                 | 36.1 (33.5-38.9) | 35.9 (33.3-38.7) | 37.6 (34.9-40.5) | 35.5 (32.9-38.3) |
| Female                                               | 37.8 (34.5-41.3) | 37.6 (34.3-41.1) | 39.4 (35.9-43.0) | 37.2 (33.9-40.7) |
| <b>Residence</b>                                     |                  |                  |                  |                  |
| Urban                                                | 40.2 (36.3-44.1) | 40.0 (36.1-43.9) | 41.9 (37.8-45.9) | 39.6 (35.7-43.6) |
| Rural                                                | 35.5 (32.5-38.7) | 35.3 (32.2-38.5) | 37.0 (33.8-40.3) | 34.9 (31.9-38.1) |
| <b>Self-reported history of chronic disease</b>      |                  |                  |                  |                  |
| Yes                                                  | 43.2 (40.4-46.1) | 41.9 (37.4-46.6) | 43.6 (38.9-48.5) | 41.3 (36.8-46.1) |
| No                                                   | 37.8 (36.4-39.1) | 36.2 (33.7-38.9) | 37.7 (35.1-40.5) | 35.6 (33.1-38.3) |
| <b>History of COVID-19 like symptoms</b>             |                  |                  |                  |                  |
| Yes                                                  | 52.1 (47.6-56.6) | 47.4 (37.9-57.1) | 49.4 (39.5-59.5) | 46.9 (37.3-56.7) |
| No                                                   | 37.7 (36.4-38.9) | 36.3 (33.9-38.8) | 37.8 (35.3-40.4) | 35.7 (33.3-38.2) |
| <b>History of contact with a known COVID-19 case</b> |                  |                  |                  |                  |
| Yes                                                  | 49.9 (45.2-54.5) | 45.2 (38.3-52.2) | 47.1 (39.9-54.4) | 44.7 (37.7-51.7) |
| No                                                   | 37.9 (36.7-39.2) | 36.5 (34.1-39.0) | 38.0 (35.5-40.6) | 35.9 (33.5-38.4) |
| <b>Ever tested for COVID-19 (RT-PCR)</b>             |                  |                  |                  |                  |
| Yes                                                  | 44.4 (41.5-47.4) | 41.0 (35.4-46.9) | 42.7 (36.9-48.9) | 40.4 (34.8-46.4) |
| No                                                   | 37.6 (36.2-38.9) | 36.2 (33.5-39.0) | 37.7 (34.9-40.6) | 35.6 (32.9-38.4) |
| <b>RT-PCR result (n=1088*)</b>                       |                  |                  |                  |                  |
| Positive                                             | 79.5 (73.0-84.9) | 81.8 (74.8-87.1) | 85.3 (78.0-90.8) | 81.6 (74.6-87.0) |
| Negative                                             | 37.8 (34.7-41.0) | 38.8 (33.3-44.7) | 40.4 (34.7-46.6) | 38.2 (32.7-44.2) |

Seroprevalence was lowest among participants aged 18-29 years [33.5% (95% CI 29.8 – 37.4)] and was higher in older age groups. Seroprevalence was highest in those aged 70 years and above [45.1% (95% CI 37.6 – 52.8)]. Seroprevalence was not significantly different among males and females ( $p=0.34$ ). The seroprevalence among urban residents was 40.0% (95% CI 36.1 – 43.9), slightly but not significantly, higher than rural residents [35.3% (95% CI 32.2 – 38.5),  $p=0.07$ ]. (Table 2)

One in five participants (1145/6230, 18.4%) self-reported history of at least one chronic disease (Table 1). Hypertension (815/6230, 13.1%) and diabetes mellitus (314/6230, 5.0%) were the most commonly reported chronic diseases (online supplemental file 2). Seroprevalence was significantly higher in participants who self-reported history of chronic disease (41.7%, 95% CI 37.2 – 46.4) as compared to those who did not report a history of chronic disease (36.0%, 95% CI 33.5 - 38.7) (Table 2).

1  
2  
3 Among participants who reported a history of COVID-19 like symptoms, seroprevalence was 47.2% (95%  
4 CI 37.7 – 56.9) compared with 36.1% (95% CI 33.7 – 38.6) among participants who did not report such  
5 symptoms. Seroprevalence was higher among those who reported contact with a known COVID-19 case  
6 [45.0% (95% CI 38.1 – 52.0)] than participants who did not report any history of such contact [36.3%  
7 (95% CI 33.9 – 38.8)]. (Table 2)  
8  
9

10 Seroprevalence was not significantly related to being tested for COVID-19 (RT-PCR). However, those who  
11 reported a positive RT-PCR COVID-19 test had significantly higher seroprevalence (81.7%, 95% CI 74.7 –  
12 87.1) as compared to those who reported a negative RT-PCR COVID-19 test (38.6%, 95% CI 33.1 – 44.5).  
13 (Table 2)  
14

15 Among 2 415 seropositive individuals, only 247 (10.2%) reported a history of COVID-19 like symptoms.  
16 Only 20.1% (485/2415) of the seropositive individuals were tested for COVID-19 (RT-PCR). Among 474  
17 who reported a history of COVID-19 like symptoms, 233 (49.2%) were tested for COVID-19 (RT-PCR).  
18 Among 4897 individuals who did not report a history of COVID-19 like symptoms and were never tested  
19 for COVID-19 (RT-PCR), 1825 (37.3%) were seropositive. (Figure 3)  
20  
21

22 Among 36 participants who reported a positive RT-PCR COVID-19 test but were seronegative, the  
23 duration between COVID-19 RT-PCR test and serological testing ranged from 9 days to 101 days. In only  
24 four of these 36 participants, the duration between the COVID-19 RT-PCR test and the serological test  
25 was 14 days or less. Of the remaining 32 participants, 21 did not report a history of COVID-19 like  
26 symptoms, nine did not report a history of contact with a known COVID-19 case, and eight reported  
27 neither a history of COVID-19 like symptoms nor a history of contact with a known COVID-19 case.  
28  
29

30 We estimated that there were 1 673 484 (95% CI 1 564 047 – 1 787 482) cumulative number of  
31 infections among adults aged  $\geq 18$  years in the valley by 03 Oct 2020, two weeks before the start of the  
32 survey. If we assume that the seroprevalence was similar to the overall seroprevalence in the population  
33 not included in our study ( $< 18$  years of age) then the estimated cumulative number of infections in the  
34 valley by 03 Oct 2020 was 2 791 933 (95% CI 2 609 354 – 2 982 119). Considering that the cumulative  
35 number of reported COVID-19 cases was 47 071 by 03 Oct 2020 (Figure 4), we estimate the number of  
36 infections per reported case as 59.3 (95% CI 55.4 – 63.4). The number of reported COVID-19 deaths after  
37 a three-week lag period (on 24 Oct 2020) was 955. Thus, we estimated the infection fatality rate as  
38 0.034% (95% CI 0.032 – 0.037). Of the total estimated SARS-CoV-2 infected persons, only 1.69% (47  
39 071/2 791 933) were reported. Of the total reported COVID-19 cases, 2.03% (955/47 071) died.  
40  
41  
42

## 43 DISCUSSION

44 We report the results of a seroprevalence survey conducted in Kashmir from October-November 2020,  
45 seven months after the appearance of the first local COVID-19 case. The COVID-19 pandemic is rapidly  
46 evolving worldwide. In Kashmir, several important events happened since we completed our survey.  
47 From 16 Jan 2021, COVID-19 vaccination was introduced in a phased manner. Healthcare workers were  
48 given preference during the first phase. From 01 Mar 2021, the vaccine was made available for people  
49  $\geq 60$  years of age and those with chronic diseases in the age group of 45-59 years. However, especially  
50 during the early phases of the COVID-19 vaccination campaign, many people were hesitant to receive  
51 the vaccine doses. During the same time, SARS-CoV-2 Variants of Concern began to emerge and  
52 circulate. The daily number of COVID-19 cases started to rise again. The 'second wave' in April 2021 was  
53 more explosive than the 'first wave' at the beginning of the pandemic. The fear of the disease had  
54  
55  
56  
57

1  
2  
3 diminished, and COVID appropriate behaviour was no more a norm. The government and the people  
4 were caught unawares. There were several reports of a possible 'second infection' and reports of cases  
5 among previously vaccinated individuals. Given these developments, the current seroprevalence in  
6 Kashmir will be higher than what we report in this study.  
7

8  
9 The results of our study indicate that by the first week of October 2020, nearly seven months after the  
10 appearance of the first laboratory-confirmed COVID-19 case on 18 March 2020, close to 37% of the  
11 valley's population aged  $\geq 18$  years had been infected. Our results suggest that the cumulative number of  
12 SARS-CoV-2 infections by the first week of October 2020 was nearly 2.8 million, with an estimated  
13 infection fatality rate of 0.034%. Seroprevalence did not differ by gender but was higher in older age  
14 groups.  
15

16  
17 The findings of our study are based on a representative sample of the population. The laboratory test  
18 used for the detection of SARS-CoV-2 specific IgG antibodies in serum samples provides valid  
19 results.[20,25] We report seroprevalence estimates adjusted for sampling design and test performance.  
20

21  
22 The overall adjusted seroprevalence of around 37% indicates that, by October 2020, a large proportion  
23 of the valley's population had been infected with the virus. Easing of lockdown, being fed up with the  
24 restrictions, and non-adherence to prevention norms are the possible reasons. Using several  
25 assumptions about the test sensitivity and specificity to calculate adjusted seroprevalence estimates  
26 yielded small differences.  
27

28  
29 Several factors potentially influence the seroprevalence rates. These include population density, social  
30 and demographic structure of the population, governmental policies and the extent of their  
31 implementation, immunity level of the population, time since the start of infection transmission,  
32 adherence to infection prevention guidelines, quality of contact tracing and quarantine, and possibly the  
33 geography and environment of an area. The emergence of several Variants of Concern and the  
34 introduction of COVID-19 vaccination will also influence population immunity. Herd immunity in the  
35 context of COVID-19 is a matter of debate as reports of a second infection continue to pour in.[26]  
36

37  
38 Comparison with previous reports suggests that, by October 2020, the seroprevalence had increased  
39 almost ten-fold since July 2020.[16,27] The second of the three nationwide seroprevalence surveys in  
40 India conducted in August-September 2020 reports an overall seroprevalence of 6.6%, ranging from  
41 5.2% in rural areas to 16.9% in urban slums.[28] A nationwide survey conducted in December 2020-  
42 January 2021 reported an overall seroprevalence of 24.1% ranging from 4.9% - 44.4% across  
43 districts.[29] Kashmir is thus not a low-infection area. Being an oft-visited tourist area, Kashmir is at an  
44 increased risk of infection transmission. Adherence to COVID appropriate behavior (use of face masks in  
45 public, frequent handwashing, physical and social distancing) has been poor. The experience of a  
46 'second wave' of COVID-19 in April-June 2021, the appearance of virus variants, and the introduction of  
47 vaccination programs warrant robust surveillance of the epidemic.  
48

49  
50 The seroprevalence of SARS-CoV-2 IgG antibodies was higher in older age groups. During the early  
51 period of the pandemic, people were adherent to social distancing and other non-pharmaceutical  
52 interventions because of a fear of the disease and administrative restrictions. With time, administrative  
53 restrictions were relaxed, fear of the disease attenuated, and people became fed up with the social  
54 restrictions. This led to an increase in the number of reported COVID-19 cases and provided the  
55 population, including older age groups, an opportunity to contract the infection. That older people have  
56  
57

1  
2  
3 an increased risk of symptomatic and more severe disease is now well known.[30,31] However, age-  
4 based differential susceptibility to SARS-CoV-2 infection antibody response and the reasons thereof are  
5 still a grey area and need further understanding. Existing literature might suggest that the more mobile  
6 and socially active young have a higher risk of infection.[6,7] However, this should not imply that the  
7 elderly have a decreased susceptibility to SARS-CoV-2 infection or a decreased antibody response.[32]  
8 On the contrary, several studies suggest that the seroprevalence of SARS-CoV-2 specific IgG antibodies is  
9 higher in the older age groups and particularly so in more dense population groups.[4,5,8–11,13]  
10 Furthermore, SARS-CoV-2 antibody levels have been reported to be higher in older people.[12]  
11

12  
13 The seroprevalence of SARS-CoV-2 specific IgG antibodies did not differ significantly by gender, though  
14 the figure was slightly higher for females. These findings are consistent with the available  
15 literature.[6,13] Difference in seroprevalence by gender has been suggested by some studies, and  
16 females have been reported to have lower antibody levels.[5,7,9,11,12,14,33]  
17  
18

19 Urban areas are more densely populated than rural areas, accelerating the transmission of infections in  
20 the population. The seroprevalence of SARS-CoV-2 specific IgG antibodies is thus expected to be higher  
21 in urban areas, especially during the early phases of an epidemic. However, as the epidemic progresses,  
22 the seroprevalence gap between urban and rural areas will wane off. We estimated an adjusted  
23 seroprevalence of 40.0% (95% CI 36.1 – 43.9) in urban areas as compared to 35.3% (95% CI 32.2 – 38.5)  
24 in rural areas ( $p=0.07$ ).  
25

26  
27 People with a chronic disease experience more severe COVID-19 symptoms and are more likely to die  
28 when compared to people with no chronic disease.[34] We found a higher proportion of symptomatic  
29 infection among participants with a self-reported history of chronic disease (78/1145, 6.8%) as  
30 compared to participants with no chronic disease (169/5085, 3.3%) (online supplemental file 3). Little is,  
31 however, known about the risk of infection in chronic disease patients. We found a significantly higher  
32 seroprevalence among participants with a self-reported history of chronic disease (Table 2). This finding  
33 needs further research for corroboration and possible explanations.  
34  
35

36 People with a self-reported history of COVID-19 related symptoms, contact with a known COVID-19  
37 case, or a positive COVID-19 RT-PCR had a higher seroprevalence as compared to their complement.  
38 Among seropositive individuals, only 10.2% reported being symptomatic. The percentage of  
39 asymptomatic infections, thus, was 90%. However, only 49% of individuals with a history of COVID-19  
40 like symptoms were tested using RT-PCR. We also estimated that only one out of almost 59 infections  
41 gets reported. This reflects the necessity of improving the efficiency of RT-PCR testing so that more  
42 symptomatic individuals receive the test. Not all individuals with a known RT-PCR positive result showed  
43 the presence of IgG antibodies. Around 20% of RT-PCR positive individuals were seronegative, and in a  
44 large majority of them (32 out of 36), the duration since RT-PCR positivity was more than two weeks.  
45 This may be attributed to a poor B cell response or a false negative antibody test.[35] Around 38% of RT-  
46 PCR negative individuals were seropositive, suggesting a false-negative RT-PCR or infection acquisition at  
47 a date later than the RT-PCR test.  
48  
49  
50

51 We estimated an infection fatality rate of 0.034% (95% CI 0.032 – 0.037). The infection fatality rate in  
52 SARS-CoV-2 infection has been reported to range from as low as 0.00% to 1.63%.[36] Our estimates of  
53 the infection fatality rate are low as compared to estimates from several Indian studies.[5,28,37] Under-  
54 reporting COVID-19 deaths because of the non-uniform definition for a 'COVID-19 death' may falsely  
55 lower the infection fatality rates.[38] Many other factors can influence the infection fatality rate in SARS-  
56  
57

1  
2  
3  
4  
5  
6  
7  
8  
9  
10  
11  
12  
13  
14  
15  
16  
17  
18  
19  
20  
21  
22  
23  
24  
25  
26  
27  
28  
29  
30  
31  
32  
33  
34  
35  
36  
37  
38  
39  
40  
41  
42  
43  
44  
45  
46  
47  
48  
49  
50  
51  
52  
53  
54  
55  
56  
57  
58  
59  
60

CoV-2 infection – the quality of available health facilities, the age structure of the population, and COVID-19 epidemic intensity.[39,40] Developing countries usually have a younger population as compared to the developed countries, and Kashmir is not an exception. However, because of the possibility of under-reporting of COVID-19 deaths, the true infection fatality rate in Kashmir may be higher than our estimates. The infection fatality rate is, however, known to be lower in developing nations.[30,41] In developed nations like the United States and many European countries, a higher infection fatality rate has been reported.[30,42]

### Limitations

One important limitation of our study is that even though we adjusted the weighted seroprevalence estimates for test performance using manufacturer-provided sensitivity and specificity (100% and 99-63% respectively), we did not quantify the test validity in-house. Another limitation of our study estimates is that we excluded people <18 years of age. The results of our study may not thus be generalizable to this group of the population.

Our estimated seroprevalence was much higher than we anticipated at the designing stage. This has impacted the precision of our estimates to some extent. However, we believe we still have been able to estimate the seroprevalence with reasonable precision.

Lack of reliable death counts is another potential limitation. This may have led to an underestimation of the infection fatality rate. We did not perform any adjustment for death counts. Further, because of lack of age- and gender-specific mortality data, we could not estimate age- and gender-specific infection fatality rates.

### CONCLUSIONS

We conclude that nearly 37% of individuals aged 18 years and above were infected with SARS-CoV-2 in Kashmir by October 2020. The infection fatality rate in the valley is around 0.034%. A majority of cases go unreported. For every reported case, there are 59 unreported infections in the population. Since almost half of the symptomatic individuals go unreported, testing of symptomatic individuals and effective contact tracing needs to continue. Given the emergence of mutant Variants of Concern, increasing the population immunity through augmented and sustained vaccination is necessary. We further recommend that adherence to COVID-19 prevention measures should be ensured until a large proportion of the population gets vaccinated.

### ACKNOWLEDGMENTS

We thank Prof. Samia Rashid for her support. We acknowledge the help from Divisional COVID-19 Control Room Kashmir, especially from Dr. Rauf Hussain Rather. We thank the following coordinating center teams and the laboratory support team for their support and coordination:

Coordinating center teams: Dr. Sabira Aalia Dkhar, Dr. Kouser Sideeq, Dr. Uruj Qureshi, Dr. Mehraj u Din Sofi, Dr. Yasmin Kango, Dr. Suhail Manzoor Shah, Dr. Bashir Ahmad Khan, Dr. Nabeel Ishtiyahq, Dr. Tajamul Hussain Khan, Dr. Lahoot Hassan Khan, Dr. Muzaffer Ahmad, Dr. Ramesh Kumar Malla, Dr. Ruqaya Rasool Kapta, Dr. Mohammad Yousuf Naikoo, Dr. Khalid Abbass, Dr. Zarar Ahmad Bhat, Dr. Sumair Rashid, Dr. Zubair Ahmad, Dr. Shalender Singh Bali, Dr. Abdul Rouf, Dr. Abdul Hamid, Dr. Khalid Bashir, Dr. Qazi Najeeb Ahmad, Dr. Syed Irtiza, Dr. P Sharik Shaheen Khaki, Dr. Sheikh Mohammad Shafi,

1  
2  
3 Dr. Mohammad Yousuf Zagoo, Dr. Mukhtar Ahmad Shah, Dr. Imtiaz-ur-Rehman Bhat, Dr. Showkat  
4 Parray, Dr. Fazil Ali Kochak, Dr. Muzaffar Ahmad Zargar, Dr. Abdul Rashid Shah, Dr. Shagufta Saleem, Dr.  
5 Abdul Gani, Dr. Nighat Nasreen, Dr. Asima Nazeer, Dr. Zahoor Ahmad Lone.

6  
7 Laboratory support team: Ishtiyah Ahmad Handoo, Rahiba Makhdoomi, Iyman Wani, Romana Rasool,  
8 Asiya Rehman, Insha Rehman, Zahoor Ahmad, Gulzar Ahmad Wani, Javid Ahmad Bhat, M Saleem Malik,  
9 Naveed Manzoor, Mubeena.

## 11 **COMPETING INTERESTS**

12  
13 We declare no competing interests, financial or otherwise.

## 14 **FUNDING**

15  
16 The National Health Mission Jammu & Kashmir funded the study. The funding agency was not involved  
17 in study designing, implementation, analysis, or interpretation of the study findings.

## 18 **CONTRIBUTORS**

19  
20 S Muhammad Salim Khan: Conceptualization, Funding acquisition, Methodology, Writing-review &  
21 editing.

22  
23 Mariya Amin Qurieshi, Inaamul Haq, Sabhiya Majid: Formal analysis, Data curation, Methodology,  
24 Project administration, Writing-original draft, Writing-review & editing.

25  
26 Javid Ahmad, Taha Ayub, Anjum Bashir, Ashfaq Ahmad Bhat, Abdul Majeed Ganai, Yasmeen Jan, Rauf-  
27 ur-Rashid Kaul, Zahid Ali Khan, Muneer Ahmad Masoodi, Beenish Mushtaq, Fouzia Nazir, Muzamil Nazir,  
28 Malik Waseem Raja, Mahbooba Rasool: Project administration, Supervision, Investigation, Writing-  
29 review & editing.

30  
31 Anjum Asma, Munazza Aziz, Shifana Ayoub, Arif Akbar Bhat, Iqra Nisar Chowdri, Shaista Ismail, Misbah  
32 Ferooz Kawoosa, Mehvish Afzal Khan, Mosin Saleem Khan, Rafiya Kousar, Ab Aziz Lone, Shahroz Nabi,  
33 Mohammad Obaid, Tanzeela Bashir Qazi, Iram Sabah, Ishtiyah Ahmad Sumji: Supervision, Investigation,  
34 Writing-review & editing.

35  
36 S Muhammad Salim Khan, Mariya Amin Qurieshi, Inaamul Haq, and Sabhiya Majid have verified the  
37 underlying data.

## 38 **DATA SHARING**

39  
40 Anonymized data collected for the study, including individual participant data and a data dictionary  
41 defining each field in the set, will be made available to interested researchers on request by Inaamul  
42 Haq ([haqinaam@yahoo.co.in](mailto:haqinaam@yahoo.co.in)) for two years from publication. The study protocol, statistical analysis  
43 plan, and informed consent forms are also available from Inaamul Haq.

## REFERENCES

- 1 Timeline of WHO's response to COVID-19. <https://www.who.int/emergencies/diseases/novel-coronavirus-2019/interactive-timeline#!> (accessed 26 Mar 2021).
- 2 Saleem S, Quansar R, Qurieshi M. COVID-19: Preparedness and response by union territory of Jammu and Kashmir for containment of pandemic. *Curr Med Issues* 2020;**18**:206. doi:10.4103/cmi.cmi\_56\_20
- 3 Peirlinck M, Linka K, Sahli Costabal F, *et al.* Visualizing the invisible: The effect of asymptomatic transmission on the outbreak dynamics of COVID-19. *Comput Methods Appl Mech Eng* 2020;**372**. doi:10.1016/j.cma.2020.113410
- 4 Borges LP, Martins AF, de Melo MS, *et al.* Seroprevalence of SARS-CoV-2 IgM and IgG antibodies in an asymptomatic population in Sergipe, Brazil. *Rev Panam Salud Publica/Pan Am J Public Heal* 2020;**44**:e108. doi:10.26633/RPSP.2020.108
- 5 Malani A, Shah D, Kang G, *et al.* Seroprevalence of SARS-CoV-2 in slums versus non-slums in Mumbai, India. *Lancet Glob. Heal.* 2021;**9**:e110–1. doi:10.1016/S2214-109X(20)30467-8
- 6 Capai L, Ayhan N, Masse S, *et al.* Seroprevalence of SARS-CoV-2 IgG Antibodies in Corsica (France), April and June 2020. *J Clin Med* 2020;**9**:3569. doi:10.3390/jcm9113569
- 7 Mahajan S, Srinivasan R, Redlich CA, *et al.* Seroprevalence of SARS-CoV-2-Specific IgG Antibodies Among Adults Living in Connecticut: Post-Infection Prevalence (PIP) Study. *Am J Med* 2021;**134**:526-534.e11. doi:10.1016/j.amjmed.2020.09.024
- 8 Goldstein E, Lipsitch M, Cevik M. On the Effect of Age on the Transmission of SARS-CoV-2 in Households, Schools, and the Community. *J Infect Dis* 2021;**223**:362–9. doi:10.1093/infdis/jiaa691
- 9 Pan Y, Li X, Yang G, *et al.* Seroprevalence of SARS-CoV-2 immunoglobulin antibodies in Wuhan, China: part of the city-wide massive testing campaign. *Clin Microbiol Infect* 2021;**27**:253–7. doi:10.1016/j.cmi.2020.09.044
- 10 Pagani G, Conti F, Giacomelli A, *et al.* Seroprevalence of SARS-CoV-2 significantly varies with age: Preliminary results from a mass population screening. *J. Infect.* 2020;**81**:e10–2. doi:10.1016/j.jinf.2020.09.021
- 11 Vena A, Berruti M, Adessi A, *et al.* Prevalence of Antibodies to SARS-CoV-2 in Italian Adults and Associated Risk Factors. *J Clin Med* 2020;**9**:2780. doi:10.3390/jcm9092780
- 12 Gudbjartsson DF, Norddahl GL, Melsted P, *et al.* Humoral Immune Response to SARS-CoV-2 in Iceland. *N Engl J Med* 2020;**383**:1724–34. doi:10.1056/nejmoa2026116
- 13 Pollán M, Pérez-Gómez B, Pastor-Barriuso R, *et al.* Prevalence of SARS-CoV-2 in Spain (ENE-COVID): a nationwide, population-based seroepidemiological study. *Lancet* 2020;**396**:535–44. doi:10.1016/S0140-6736(20)31483-5
- 14 Stringhini S, Wisniak A, Piumatti G, *et al.* Seroprevalence of anti-SARS-CoV-2 IgG antibodies in Geneva, Switzerland (SEROCoV-POP): a population-based study. *Lancet* 2020;**396**:313–9. doi:10.1016/S0140-6736(20)31304-0
- 15 Clapham H, Hay J, Routledge I, *et al.* Seroepidemiologic study designs for determining SARS-COV-

14



- 1  
2  
3 2 transmission and immunity. *Emerg. Infect. Dis.* 2020;**26**:1978–86. doi:10.3201/eid2609.201840  
4  
5 16 Khan SMS, Qurieshi MA, Haq I, *et al.* Seroprevalence of SARS-CoV-2 specific IgG antibodies in  
6 District Srinagar, northern India – A cross-sectional study. *PLoS One* 2020;**15**:e0239303.  
7 doi:10.1371/journal.pone.0239303  
8  
9 17 OpenEpi - Toolkit Shell for Developing New Applications.  
10 <http://www.openepi.com/SampleSize/SSPropor.htm> (accessed 5 Jul 2021).  
11  
12 18 Census of India Website : Office of the Registrar General & Census Commissioner, India.  
13 <https://www.censusindia.gov.in/> (accessed 26 Mar 2021).  
14  
15 19 Epicollect5 - Free and easy-to-use mobile data-gathering platform. <https://five.epicollect.net/>  
16 (accessed 26 Mar 2021).  
17  
18 20 SARS-CoV-2 Immunoassay | Abbott Core Laboratory.  
19 <https://www.corelaboratory.abbott/us/en/offerings/segments/infectious-disease/sars-cov-2>  
20 (accessed 26 Mar 2021).  
21  
22 21 Brown LD, Cai TT, Das Gupta A. Interval estimation for a binomial proportion. *Stat Sci*  
23 2001;**16**:101–17. doi:10.1214/ss/1009213286  
24  
25 22 Census of India Website : Office of the Registrar General & Census Commissioner, India.  
26 [https://censusindia.gov.in/vital\\_statistics/SRS\\_Bulletins/Bulletins.html](https://censusindia.gov.in/vital_statistics/SRS_Bulletins/Bulletins.html) (accessed 26 Mar 2021).  
27  
28 23 Sempos CT, Tian L. Adjusting Coronavirus Prevalence Estimates for Laboratory Test Kit Error. *Am J*  
29 *Epidemiol* 2021;**190**:109–15. doi:10.1093/aje/kwaa174  
30  
31 24 Bendavid E, Mulaney B, Sood N, *et al.* COVID-19 antibody seroprevalence in Santa Clara County,  
32 California. *Int J Epidemiol* 2021;**50**:410–9. doi:10.1093/ije/dyab010  
33  
34 25 Bryan A, Pepper G, Wener MH, *et al.* Performance characteristics of the abbott architect sars-  
35 cov-2 igg assay and seroprevalence in Boise, Idaho. *J Clin Microbiol* 2020;**58**:e00941-20.  
36 doi:10.1128/JCM.00941-20  
37  
38 26 Elzein F, Ibrahim A, Alshahrani F, *et al.* Reinfection, recurrence, or delayed presentation of  
39 COVID-19? Case series and review of the literature. *J Infect Public Health* 2021;**14**:474–7.  
40 doi:10.1016/j.jiph.2021.01.002  
41  
42 27 Khan MS, Haq I, Qurieshi MA, *et al.* SARS-CoV-2 Seroprevalence Among Healthcare Workers by  
43 Workplace Exposure Risk in Kashmir, India. *J Hosp Med* 2021;**16**:274–81. doi:10.12788/jhm.3609  
44  
45 28 Murhekar M V., Bhatnagar T, Selvaraju S, *et al.* SARS-CoV-2 antibody seroprevalence in India,  
46 August–September, 2020: findings from the second nationwide household serosurvey. *Lancet*  
47 *Glob Heal* 2021;**9**:e257–66. doi:10.1016/S2214-109X(20)30544-1  
48  
49 29 Murhekar M V., Bhatnagar T, Thangaraj JWV, *et al.* SARS-CoV-2 seroprevalence among the  
50 general population and healthcare workers in India, December 2020–January 2021. *Int J Infect*  
51 *Dis* 2021;**108**:145–55. doi:10.1016/j.ijid.2021.05.040  
52  
53 30 O’Driscoll M, Ribeiro Dos Santos G, Wang L, *et al.* Age-specific mortality and immunity patterns of  
54 SARS-CoV-2. *Nature* 2021;**590**:140–5. doi:10.1038/s41586-020-2918-0  
55  
56 31 Kadambari S, Klenerman P, Pollard AJ. Why the elderly appear to be more severely affected by  
57  
58 15

- 1  
2  
3 COVID-19: The potential role of immunosenescence and CMV. *Rev. Med. Virol.* 2020;**30**:e2144.  
4 doi:10.1002/rmv.2144  
5
- 6 32 Pawelec G, Weng NP. Can an effective sars-cov-2 vaccine be developed for the older population?  
7 *Immun. Ageing.* 2020;**17**. doi:10.1186/s12979-020-00180-2  
8
- 9 33 Naranbhai V, Chang CC, Beltran WFG, *et al.* High seroprevalence of anti-SARS-CoV-2 antibodies in  
10 Chelsea, Massachusetts. *J Infect Dis* 2020;**222**:1955–9. doi:10.1093/infdis/jiaa579  
11
- 12 34 Yang J, Zheng Y, Gou X, *et al.* Prevalence of comorbidities and its effects in coronavirus disease  
13 2019 patients: A systematic review and meta-analysis. *Int J Infect Dis* 2020;**94**:91–5.  
14 doi:10.1016/j.ijid.2020.03.017  
15
- 16 35 Vabret N. Antibody responses to SARS-CoV-2 short-lived. *Nat Rev Immunol* 2020;**20**:519.  
17 doi:10.1038/s41577-020-0405-3  
18
- 19 36 Ioannidis JPA. Infection fatality rate of COVID-19 inferred from seroprevalence data. *Bull World*  
20 *Health Organ* 2021;**99**:19-33F. doi:10.2471/BLT.20.265892  
21
- 22 37 Murhekar M V., Bhatnagar T, Selvaraju S, *et al.* Prevalence of SARS-CoV-2 infection in India:  
23 Findings from the national serosurvey, May-June 2020. *Indian J Med Res* 2020;**152**:48–60.  
24 doi:10.4103/ijmr.IJMR\_3290\_20  
25
- 26 38 Pulla P. What counts as a covid-19 death? *BMJ* 2020;**370**:m2859. doi:10.1136/bmj.m2859  
27
- 28 39 Mahajan S, Caraballo C, Li S-X, *et al.* SARS-CoV-2 Infection Hospitalization Rate and Infection  
29 Fatality Rate Among the Non-Congregate Population in Connecticut. *Am J Med* 2021;**134**:812-  
30 816.e2. doi:10.1016/J.AMJMED.2021.01.020  
31
- 32 40 Kenyon C. COVID-19 Infection Fatality Rate Associated with Incidence-A Population-Level Analysis  
33 of 19 Spanish Autonomous Communities. *Biology (Basel)* 2020;**9**:1–4.  
34 doi:10.3390/BIOLOGY9060128  
35
- 36 41 Gu X, Mukherjee B, Das S, *et al.* COVID-19 prediction in South Africa: Understanding the  
37 unascertained cases - The hidden part of the epidemiological iceberg. medRxiv. 2020.  
38 doi:10.1101/2020.12.10.20247361  
39
- 40 42 McCulloh I, Kiernan K, Kent T. Inferring True COVID19 Infection Rates From Deaths. *Front Big*  
41 *Data* 2020;**3**. doi:10.3389/fdata.2020.565589  
42  
43  
44  
45

46 **Figure 1 legend:**

47  
48 Figure 1: Location of the ten districts and seroprevalence (%) by district. Figures in parentheses indicate  
49 a 95% Confidence Interval for seroprevalence.  
50

51 **Figure 2 legend:**

52  
53 Figure 2: Participant flow.  
54

55 **Figure 3 legend:**

56  
57  
58 16  
59

1  
2  
3 Figure 3: A. Seropositivity by the history of COVID-19 like symptoms, RT-PCR testing, and test result. B.  
4 History of COVID-19 like symptoms by seropositivity, RT-PCR testing, and test result.  
5

6 **Figure 4 legend:**  
7

8 Figure 4: A. Daily cases and deaths in Kashmir since the start of the COVID-19 pandemic; B. Cumulative  
9 number of cases and deaths in Kashmir.  
10  
11  
12  
13  
14  
15  
16  
17  
18  
19  
20  
21  
22  
23  
24  
25  
26  
27  
28  
29  
30  
31  
32  
33  
34  
35  
36  
37  
38  
39  
40  
41  
42  
43  
44  
45  
46  
47  
48  
49  
50  
51  
52  
53  
54  
55  
56  
57

For peer review only

1  
2  
3  
4  
5  
6  
7  
8  
9  
10  
11  
12  
13  
14  
15  
16  
17  
18  
19  
20  
21  
22  
23  
24  
25  
26  
27  
28  
29  
30  
31  
32  
33  
34  
35  
36  
37  
38  
39  
40

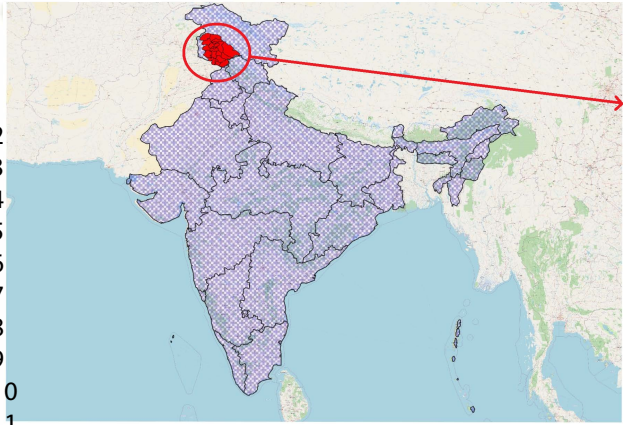

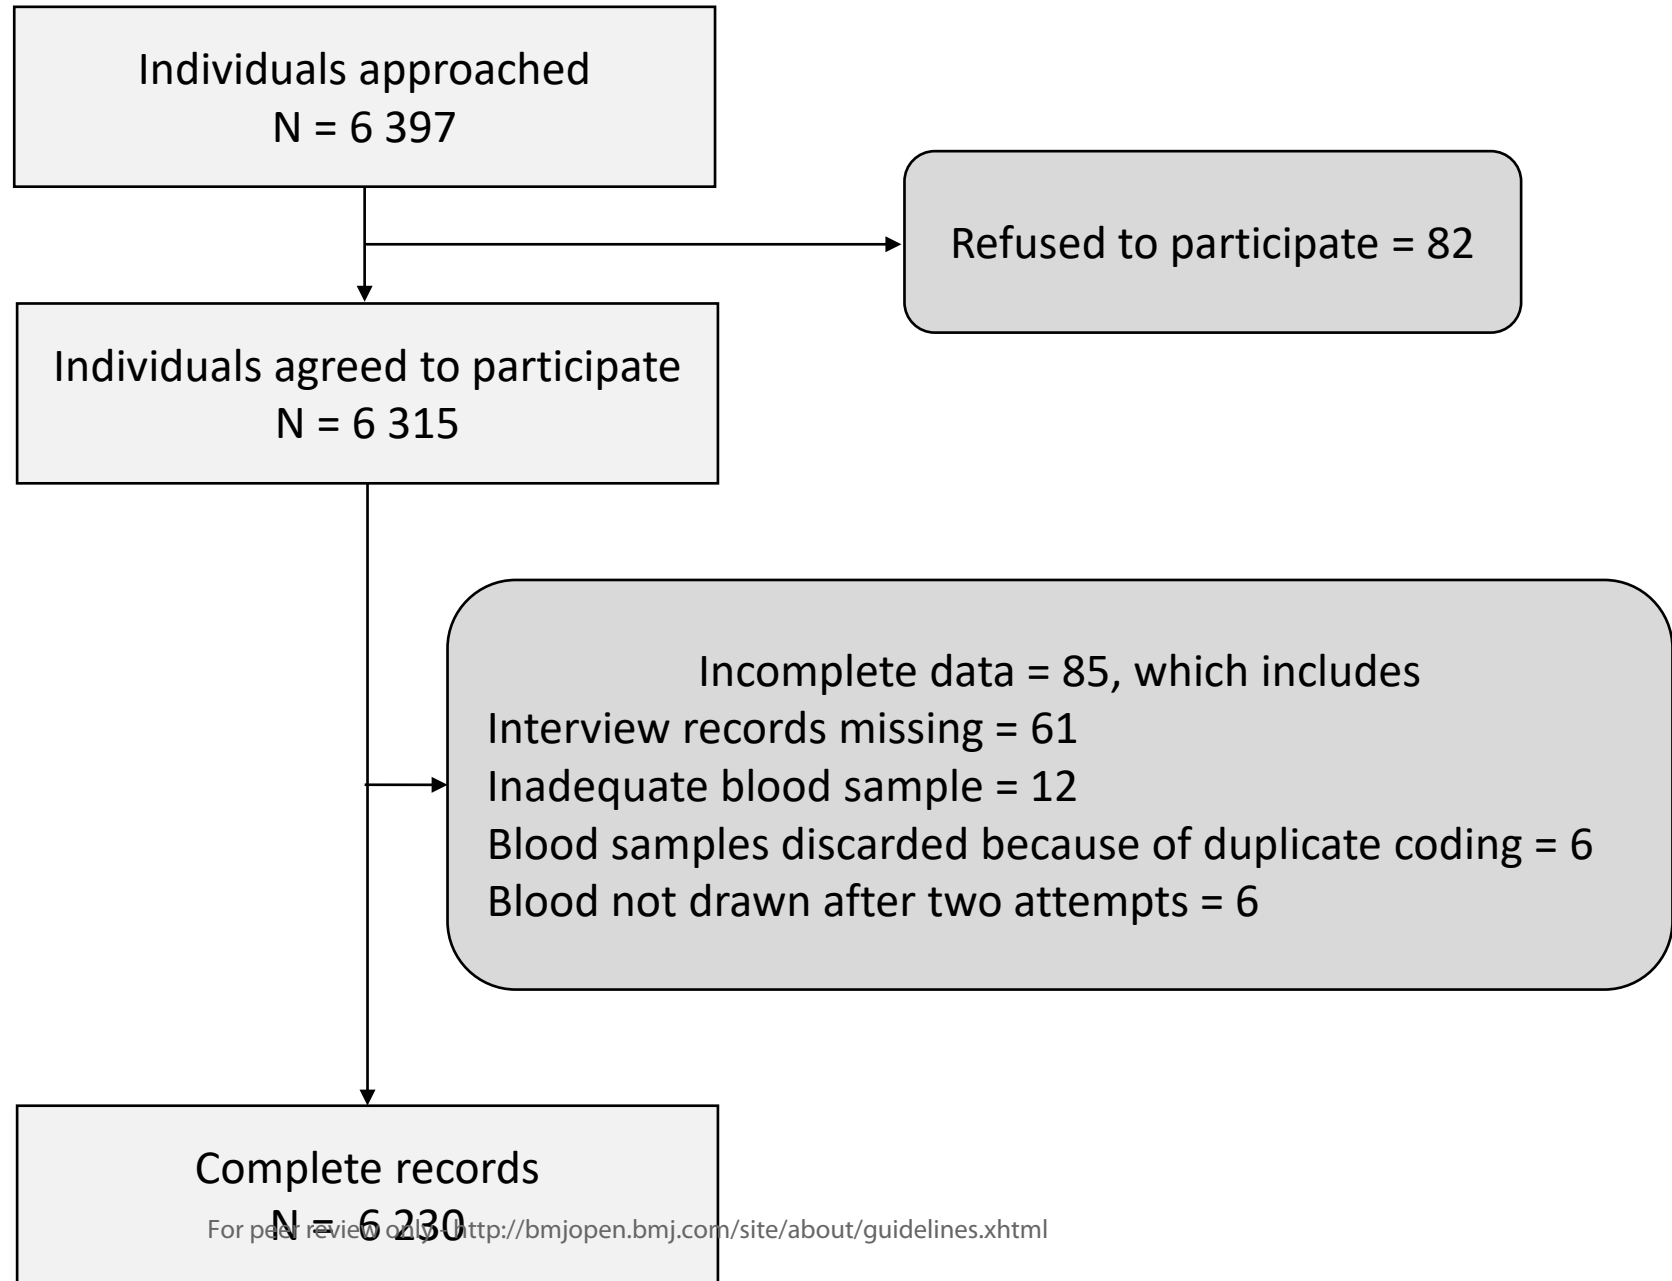

1  
2  
3  
4  
5  
6  
7  
8  
9  
10  
11  
12  
13  
14  
15  
16  
17  
18  
19  
20  
21  
22  
23  
24  
25  
26  
27  
28  
29  
30  
31  
32  
33  
34  
35  
36  
37  
38  
39  
40  
41

1  
2  
3  
4  
5  
6  
7  
8  
9  
10  
11  
12  
13  
14  
15  
16  
17  
18  
19  
20  
21  
22  
23  
24  
25  
26  
27  
28  
29  
30  
31  
32  
33  
34  
35  
36  
37  
38  
39  
40  
41  
42  
43  
44  
45  
46  
47  
48  
49  
50  
51  
52  
53  
54  
55  
56  
57  
58  
59  
60



### BMJ Open



Supplemental Table 1: Participant characteristics by district

| District     | Total       | Age (years) |             |             |            | Gender      |             | Residence   |             |
|--------------|-------------|-------------|-------------|-------------|------------|-------------|-------------|-------------|-------------|
|              |             | <30         | 30-49       | 50-69       | 70+        | Female      | Male        | Rural       | Urban       |
| Anantnag     | 421         | 84          | 197         | 113         | 27         | 214         | 207         | 295         | 126         |
| Budgam       | 442         | 113         | 190         | 105         | 34         | 263         | 179         | 354         | 88          |
| Bandipora    | 424         | 106         | 174         | 114         | 30         | 227         | 197         | 341         | 83          |
| Baramulla    | 405         | 113         | 176         | 98          | 18         | 214         | 191         | 325         | 80          |
| Ganderbal    | 442         | 92          | 210         | 123         | 17         | 233         | 209         | 346         | 96          |
| Kulgam       | 428         | 102         | 194         | 113         | 19         | 257         | 171         | 346         | 82          |
| Kupwara      | 400         | 81          | 171         | 105         | 43         | 215         | 185         | 360         | 40          |
| Pulwama      | 443         | 102         | 176         | 126         | 39         | 218         | 225         | 396         | 47          |
| Shopiyan     | 407         | 119         | 152         | 90          | 46         | 211         | 196         | 368         | 39          |
| Srinagar     | 2418        | 601         | 1032        | 656         | 129        | 1052        | 1366        | 233         | 2185        |
| <b>Total</b> | <b>6230</b> | <b>1513</b> | <b>2672</b> | <b>1643</b> | <b>402</b> | <b>3104</b> | <b>3126</b> | <b>3364</b> | <b>2866</b> |

Supplemental Table 2: Seroprevalence (unadjusted) by district and participant characteristics

| District  | Overall          | Age (years)      |                  |                  |                  | Gender           |                  | Residence        |                  |
|-----------|------------------|------------------|------------------|------------------|------------------|------------------|------------------|------------------|------------------|
|           |                  | <30              | 30-49            | 50-69            | 70+              | Male             | Female           | Urban            | Rural            |
| Anantnag  | 35.2 (30.7-39.8) | 29.8 (21-40.4)   | 34.5 (28.2-41.4) | 38.9 (30.4-48.2) | 40.7 (24.2-59.7) | 36.2 (30-43)     | 34.1 (28.1-40.7) | 42.9 (34.5-51.6) | 31.9 (26.8-37.4) |
| Budgam    | 43 (38.4-47.7)   | 44.2 (35.4-53.5) | 37.9 (31.3-45)   | 48.6 (39.2-58.1) | 50 (33.8-66.2)   | 41.9 (34.9-49.3) | 43.7 (37.8-49.8) | 38.6 (29.1-49.2) | 44.1 (39-49.3)   |
| Bandipora | 39.6 (35.1-44.4) | 37.7 (29-47.3)   | 42 (34.8-49.4)   | 40.4 (31.8-49.6) | 30 (16.4-48.3)   | 37.6 (31.1-44.5) | 41.4 (35.2-47.9) | 55.4 (44.6-65.7) | 35.8 (30.9-41)   |
| Baramulla | 34.6 (30.1-39.3) | 27.4 (20-36.4)   | 32.4 (25.9-39.6) | 44.9 (35.4-54.8) | 44.4 (24-67)     | 39.3 (32.6-46.4) | 30.4 (24.6-36.9) | 36.3 (26.5-47.3) | 34.2 (29.2-39.5) |
| Ganderbal | 39.1 (34.7-43.8) | 34.8 (25.8-45)   | 40.5 (34-47.3)   | 39.8 (31.6-48.7) | 41.2 (21-64.8)   | 39.2 (32.8-46)   | 39.1 (33-45.5)   | 42.7 (33.2-52.8) | 38.2 (33.2-43.4) |
| Kulgam    | 28.5 (24.4-33)   | 27.5 (19.7-36.9) | 26.8 (21-33.5)   | 31 (23.1-40.1)   | 36.8 (18.7-59.7) | 25.1 (19.2-32.2) | 30.7 (25.4-36.6) | 37.8 (28-48.7)   | 26.3 (21.9-31.2) |
| Kupwara   | 42.3 (37.5-47.2) | 33.3 (24-44.2)   | 39.8 (32.7-47.3) | 50.5 (41-59.9)   | 48.8 (34.4-63.4) | 41.6 (34.7-48.9) | 42.8 (36.3-49.5) | 50 (35-65)       | 41.4 (36.4-46.6) |
| Pulwama   | 43.1 (38.6-47.8) | 35.3 (26.7-45)   | 42.6 (35.5-50)   | 45.2 (36.8-54)   | 59 (43.2-73.1)   | 39.6 (33.4-46.1) | 46.8 (40.3-53.4) | 40.4 (27.5-54.9) | 43.4 (38.6-48.4) |
| Shopiyan  | 31.9 (27.6-36.6) | 28.6 (21.2-37.3) | 29.6 (22.9-37.3) | 41.1 (31.4-51.5) | 30.4 (18.9-45.1) | 31.1 (25-37.9)   | 32.7 (26.7-39.3) | 38.5 (24.7-54.4) | 31.3 (26.7-36.2) |
| Srinagar  | 40.7 (38.8-42.7) | 39.1 (35.3-43.1) | 39.2 (36.3-42.3) | 41.9 (38.2-45.7) | 53.5 (44.9-61.9) | 37.7 (35.2-40.3) | 44.6 (41.6-47.6) | 40.8 (38.7-42.9) | 39.9 (33.8-46.3) |



### Chronic disease and SARS-CoV-2 infection in the study population

Of the 6230 participants, 1145 reported a history of at least one chronic disease. Two hundred ninety-eight reported a history of more than one chronic disease.

#### Supplementary Table 3: Chronic disease in the study population

| Chronic disease (n = 1145)            | Number (%)  |
|---------------------------------------|-------------|
| Hypertension                          | 815 (13.1%) |
| Diabetes                              | 314 (5.0%)  |
| Chronic Obstructive Pulmonary Disease | 39 (0.6%)   |
| Coronary Heart Disease                | 35 (0.6%)   |
| Cerebrovascular Disease               | 16 (0.3%)   |
| Asthma                                | 15 (0.2%)   |
| Chronic Kidney Disease                | 10 (0.2%)   |
| Chronic Liver Disease                 | 5 (0.1%)    |
| Cancer                                | 4 (0.1%)    |

**Supplementary Table 4: History of COVID-19 like symptoms and seropositivity vis-à-vis history of chronic disease**

|                                                        |              | History of COVID-19 like symptoms |      |
|--------------------------------------------------------|--------------|-----------------------------------|------|
|                                                        |              | Yes                               | No   |
| Reported history of chronic disease (n=1145)           | Seropositive | 78                                | 417  |
|                                                        | Seronegative | 63                                | 587  |
| Did not report any history of chronic disease (n=5085) | Seropositive | 169                               | 1751 |
|                                                        | Seronegative | 164                               | 3001 |

Of the 1154 participants who reported a history of chronic disease 78 (6.8%) reported a history of COVID-19 like symptoms within three months of the interview date and were seropositive for SARS-CoV-2 specific IgG (symptomatic infection). The proportion of symptomatic infection among participants who did not report any history of chronic disease was 3.3% (169/5085).

STROBE Statement—Checklist of items that should be included in reports of *cross-sectional studies*

|                              | Item No | Recommendation                                                                                                                                                                                    | Page No              |
|------------------------------|---------|---------------------------------------------------------------------------------------------------------------------------------------------------------------------------------------------------|----------------------|
| <b>Title and abstract</b>    | 1       | (a) Indicate the study's design with a commonly used term in the title or the abstract                                                                                                            | 1, 3                 |
|                              |         | (b) Provide in the abstract an informative and balanced summary of what was done and what was found                                                                                               | 2                    |
| <b>Introduction</b>          |         |                                                                                                                                                                                                   |                      |
| Background/rationale         | 2       | Explain the scientific background and rationale for the investigation being reported                                                                                                              | 3                    |
| Objectives                   | 3       | State specific objectives, including any prespecified hypotheses                                                                                                                                  | 3                    |
| <b>Methods</b>               |         |                                                                                                                                                                                                   |                      |
| Study design                 | 4       | Present key elements of study design early in the paper                                                                                                                                           | 3                    |
| Setting                      | 5       | Describe the setting, locations, and relevant dates, including periods of recruitment, exposure, follow-up, and data collection                                                                   | 3 and Figure 1       |
| Participants                 | 6       | (a) Give the eligibility criteria, and the sources and methods of selection of participants                                                                                                       | 3, 4                 |
| Variables                    | 7       | Clearly define all outcomes, exposures, predictors, potential confounders, and effect modifiers. Give diagnostic criteria, if applicable                                                          | 4                    |
| Data sources/<br>measurement | 8*      | For each variable of interest, give sources of data and details of methods of assessment (measurement). Describe comparability of assessment methods if there is more than one group              | 4                    |
| Bias                         | 9       | Describe any efforts to address potential sources of bias                                                                                                                                         | 4, 5                 |
| Study size                   | 10      | Explain how the study size was arrived at                                                                                                                                                         | 3                    |
| Quantitative variables       | 11      | Explain how quantitative variables were handled in the analyses. If applicable, describe which groupings were chosen and why                                                                      | 4                    |
| Statistical methods          | 12      | (a) Describe all statistical methods, including those used to control for confounding                                                                                                             | 4, 5                 |
|                              |         | (b) Describe any methods used to examine subgroups and interactions                                                                                                                               | 5                    |
|                              |         | (c) Explain how missing data were addressed                                                                                                                                                       | 5                    |
|                              |         | (d) If applicable, describe analytical methods taking account of sampling strategy                                                                                                                | 4, 5                 |
|                              |         | (e) Describe any sensitivity analyses                                                                                                                                                             | 6, Table 3           |
| <b>Results</b>               |         |                                                                                                                                                                                                   |                      |
| Participants                 | 13*     | (a) Report numbers of individuals at each stage of study—eg numbers potentially eligible, examined for eligibility, confirmed eligible, included in the study, completing follow-up, and analysed | Figure 2, and page 5 |
|                              |         | (b) Give reasons for non-participation at each stage                                                                                                                                              | Figure 2             |
|                              |         | (c) Consider use of a flow diagram                                                                                                                                                                | Figure 2             |
| Descriptive data             | 14*     | (a) Give characteristics of study participants (eg demographic, clinical, social) and information on exposures and potential confounders                                                          | Table 1              |
|                              |         | (b) Indicate number of participants with missing data for each variable of interest                                                                                                               | Table 1, Figure 2    |
| Outcome data                 | 15*     | Report numbers of outcome events or summary measures                                                                                                                                              | Table 2              |

|    |                          |    |                                                                         |
|----|--------------------------|----|-------------------------------------------------------------------------|
| 1  |                          |    |                                                                         |
| 2  | Main results             | 16 | (a) Give unadjusted estimates and, if applicable, confounder-adjusted   |
| 3  |                          |    | estimates and their precision (eg, 95% confidence interval). Make       |
| 4  |                          |    | clear which confounders were adjusted for and why they were             |
| 5  |                          |    | included                                                                |
| 6  |                          |    |                                                                         |
| 7  |                          |    | (b) Report category boundaries when continuous variables were           |
| 8  |                          |    | categorized                                                             |
| 9  |                          |    |                                                                         |
| 10 |                          |    | (c) If relevant, consider translating estimates of relative risk into   |
| 11 |                          |    | absolute risk for a meaningful time period                              |
| 12 | Other analyses           | 17 | Report other analyses done—eg analyses of subgroups and                 |
| 13 |                          |    | interactions, and sensitivity analyses                                  |
| 14 |                          |    |                                                                         |
| 15 | <b>Discussion</b>        |    |                                                                         |
| 16 | Key results              | 18 | Summarise key results with reference to study objectives                |
| 17 |                          |    |                                                                         |
| 18 | Limitations              | 19 | Discuss limitations of the study, taking into account sources of        |
| 19 |                          |    | potential bias or imprecision. Discuss both direction and magnitude     |
| 20 |                          |    | of any potential bias                                                   |
| 21 | Interpretation           | 20 | Give a cautious overall interpretation of results considering           |
| 22 |                          |    | objectives, limitations, multiplicity of analyses, results from similar |
| 23 |                          |    | studies, and other relevant evidence                                    |
| 24 |                          |    |                                                                         |
| 25 | Generalisability         | 21 | Discuss the generalisability (external validity) of the study results   |
| 26 |                          |    |                                                                         |
| 27 | <b>Other information</b> |    |                                                                         |
| 28 | Funding                  | 22 | Give the source of funding and the role of the funders for the present  |
| 29 |                          |    | study and, if applicable, for the original study on which the present   |
| 30 |                          |    | article is based                                                        |
| 31 |                          |    |                                                                         |
| 32 |                          |    |                                                                         |

33 \*Give information separately for exposed and unexposed groups.

34

35

36

37

38

39

40

41

42

43

44

45

46

47

48

49

50

51

52

53

54

55

56

57

58

59

60
