# Supplementary material for: Seroprevalence of SARS-CoV-2-specific IgG antibodies in Kashmir, India, 7 months after the first reported local COVID-19 case: results of a population-based seroprevalence survey from October to November 2020
Source: PubMed Central journal article supplement — BMJ Open. 2021 Sep 23;11(9):e053791. doi: 10.1136/bmjopen-2021-053791 (PMC8461364; doi:10.1136/bmjopen-2021-053791), 2021-09-23
Supplement: bmjopen-2021-053791supp002.pdf [file bmjopen-2021-053791supp002.pdf]

**Supplementary Table 4: History of COVID-19 like symptoms and seropositivity vis-à-vis history of chronic disease**

|                                                        |              | History of COVID-19 like symptoms |      |
|--------------------------------------------------------|--------------|-----------------------------------|------|
|                                                        |              | Yes                               | No   |
| Reported history of chronic disease (n=1145)           | Seropositive | 78                                | 417  |
|                                                        | Seronegative | 63                                | 587  |
| Did not report any history of chronic disease (n=5085) | Seropositive | 169                               | 1751 |
|                                                        | Seronegative | 164                               | 3001 |

Of the 1154 participants who reported a history of chronic disease 78 (6.8%) reported a history of COVID-19 like symptoms within three months of the interview date and were seropositive for SARS-CoV-2 specific IgG (symptomatic infection). The proportion of symptomatic infection among participants who did not report any history of chronic disease was 3.3% (169/5085).
