# Supplementary material for: Seroprevalence of SARS-CoV-2-specific IgG antibodies in Kashmir, India, 7 months after the first reported local COVID-19 case: results of a population-based seroprevalence survey from October to November 2020
Source: PubMed Central journal article supplement — BMJ Open. 2021 Sep 23;11(9):e053791. doi: 10.1136/bmjopen-2021-053791 (PMC8461364; doi:10.1136/bmjopen-2021-053791), 2021-09-23
Supplement: bmjopen-2021-053791supp003.pdf [file bmjopen-2021-053791supp003.pdf]

### Chronic disease and SARS-CoV-2 infection in the study population

Of the 6230 participants, 1145 reported a history of at least one chronic disease. Two hundred ninety-eight reported a history of more than one chronic disease.

**Supplementary Table 3: Chronic disease in the study population**

| Chronic disease (n = 1145)            | Number (%)  |
|---------------------------------------|-------------|
| Hypertension                          | 815 (13.1%) |
| Diabetes                              | 314 (5.0%)  |
| Chronic Obstructive Pulmonary Disease | 39 (0.6%)   |
| Coronary Heart Disease                | 35 (0.6%)   |
| Cerebrovascular Disease               | 16 (0.3%)   |
| Asthma                                | 15 (0.2%)   |
| Chronic Kidney Disease                | 10 (0.2%)   |
| Chronic Liver Disease                 | 5 (0.1%)    |
| Cancer                                | 4 (0.1%)    |
